# Supplementary material for: Efficient metal-free green syntheses of 4H-chromenes and 3-amino alkylated indoles using a reusable graphite oxide carbocatalyst under aqueous and solvent-free reaction conditions
Source: Royal Society of Chemistry journal article supplement (doi:10.1039/d2nj00756h), 2022-01-01

## SUPPLEMENTARY INFORMATION

### **Efficient Metal-Free Green Syntheses of 4*H*-Chromenes and 3-Aminoalkylated Indoles Using Reusable Graphite Oxide Carbocatalyst Under Aqueous and Solvent-Free Reaction Conditions**

Lenida Kyndiah, Phillip Kumar Sarkar, Ajay Gupta, Amartya Kumar Pal\*

Department of Chemistry, Centre for Advanced Studies, North-Eastern Hill University,  
Shillong-793022, Meghalaya, India.

E-mail: amartya\_pal22@yahoo.com, akpal@nehu.ac.in Tel: +91 364 2722606 Fax: +91 364  
2550076

| <b>Table of content</b>                                                                                  | <b>Page No.</b> |
|----------------------------------------------------------------------------------------------------------|-----------------|
| 1. Weight % of C and O in GO                                                                             | S2              |
| 2. Preparation of Graphite Oxide                                                                         | S2              |
| 3. Calculation for TON and TOF                                                                           | S2-S3           |
| 4. Spectral data of the compounds ( <b>4a-4q, 8a-8n and 8a* &amp; 8l*</b> )                              | S3 - S18        |
| 5. References                                                                                            | S18 - S19       |
| 6. <sup>1</sup> H and <sup>13</sup> C NMR spectra of compounds ( <b>4a-4q, 8a-8n and 8a* &amp; 8l*</b> ) | S19 - S51       |

## 1. Weight % of C and O in GO

| Full results :                            |          |          |                 |                          |               |         |              |
|-------------------------------------------|----------|----------|-----------------|--------------------------|---------------|---------|--------------|
| Processing option : All elements analyzed |          |          |                 | Number of iterations : 1 |               |         |              |
| Element                                   | Line     | k factor | Absorbion corr. | Weight%                  | Weight% sigma | Atomic% | Standard     |
| C                                         | K_SERIES | 1.706    | 1.0000          | 17.45                    | 3.51          | 21.97   | Standardless |
| O                                         | K_SERIES | 1.353    | 1.0000          | 82.55                    | 3.51          | 78.03   | Standardless |
| Totals                                    |          |          |                 | 100.00                   |               |         |              |

## 2. Preparation of graphite oxide (GO)

Graphite Oxide (GO) was prepared in accordance with the modified Hummer's method from graphite powder. 20 mL of sulphuric acid (H<sub>2</sub>SO<sub>4</sub>, 98 %) was kept in a reaction flask. and the flask was kept in an ice bath. To this, 1 g of graphite (Sigma-Aldrich) and sodium nitrate (500 mg) was added. Then, 4 g of potassium permanganate (KMnO<sub>4</sub>) was added slowly in portions over a period of an hour under stirring to avoid any explosion. After the addition is complete, the reaction mixture was allowed to stir for another hour. The mixture was then heated slowly to 45 °C and stirred maintaining the temperature for one more hour. After that, 20 mL of deionized (DI) water was added and heated (45 °C) for another 30 mins. Finally, 180 mL of DI water was mixed followed by dropwise addition of hydrogen peroxide (H<sub>2</sub>O<sub>2</sub>, 30 %) until the colour of the solution changed from dark brown to yellowish-brown. The prepared graphite oxide was then recovered by centrifugation and washed with DI water (3 X 10 mL), EtOH (3 X 10 mL), and diethyl ether (3 X 10 mL). After washing, the graphite oxide was allowed to dry under vacuum to obtain a yellowish-brown powder.

## 3. Calculation for TON and TOF

For a catalytic reaction system, the effectiveness of the catalyst can be expressed in terms of turnover number (TON) and turnover frequency (TOF). The TON is a unitless measure and can be calculated as:-

$$\text{TON} = \% \text{ conversion} \times \text{No. of moles of reactants} / \text{No. of active sites of catalyst in moles}$$

And TOF can be calculated as:-

$$\text{TOF} = \text{TON}/\text{time}$$

From TPD Analysis, 1 g of the catalyst contains 39 mmol of active sites

Therefore, 1 mg of the catalyst contains  $3.9 \times 10^{-2}$  mmol of active sites

For 4*H*-Chromenes,

Since, 10 mg of the catalyst is used for the reaction

Hence, 10 mg of the catalyst contains 0.39 mmol of active sites

$$\text{TON} = 92 \times 1/0.39$$

$$= 236$$

$$\text{TOF} = 236/3$$

$$= 79 \text{ h}^{-1}$$

For 3-amino alkylated indoles,

Since, 8 mg of the catalyst is used for the reaction

Hence, 8 mg of the catalyst contains 0.31 mmol of active sites

$$\text{TON} = 92 \times 1/0.31$$

$$= 298$$

$$\text{TOF} = 236/6$$

$$= 49 \text{ h}^{-1}$$

#### 4. Spectral data of the compounds (4a-4q, 8a-8n and 8a\* & 8l\*)

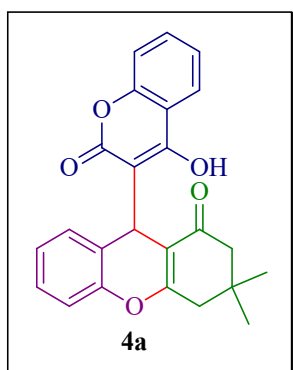

Colourless solid. M.p.: 232-234 °C. <sup>1</sup>H NMR (CDCl<sub>3</sub>, 400 MHz): δ = 11.03 (s, 1H), 7.98 (dd, *J* = 1.6 Hz, 1H), 7.45-7.41 (m, 1H), 7.26-7.22 (m, 1H), 7.20-7.14 (m, 2H), 7.06 (d, *J* = 8.0 Hz, 1H), 7.00 (d, *J* = 4.4 Hz, 2H), 5.03 (s, 1H), 2.65-2.49 (dd, *J* = 17.8, 45.8 Hz, 2H), 2.39-2.29

(dd,  $J=16.8, 25.2$  Hz, 2H), 1.11 (s, 3H), 1.01 (s, 3H).  $^{13}\text{C}$  NMR ( $\text{CDCl}_3$ , 100 MHz):  $\delta = 200.3, 169.1, 160.1, 159.9, 151.9, 150.1, 130.5, 127.5, 127.1, 123.9, 123.1, 122.6, 121.2, 115.9, 115.1, 114.9, 108.9, 108.1, 48.8, 40.5, 31.3, 28.2, 27.4, 26.1$ . [1]

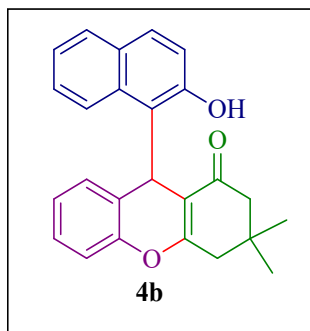

White solid. M.p.: 223-224 °C.  $^1\text{H}$  NMR ( $\text{CDCl}_3$ , 400 MHz):  $\delta = 9.26$  (s, 1H), 7.89-7.76 (m, 2H), 7.68 (d,  $J = 8.0$  Hz, 1H), 7.42-7.36 (m, 2H), 7.34 (d,  $J = 8.8$  Hz, 1H), 7.01-6.99 (m, 2H), 6.62-6.60 (m, 2H), 5.76 (s, 1H), 2.60 (s, 2H), 2.44 (dd,  $J = 16.6, 25.8$  Hz, 2H), 1.14 (s, 3H), 0.99 (s, 3H).  $^{13}\text{C}$  NMR ( $\text{CDCl}_3$ , 100 MHz):  $\delta = 200.7, 166.8, 152.8, 147.8, 132.7, 131.5, 131.0, 129.1, 128.7, 128.2, 127.9, 127.5, 125.2, 123.4, 121.5, 118.8, 117.4, 116.5, 113.9, 50.2, 41.5, 32.4, 29.0, 27.9, 27.2$ . [1]

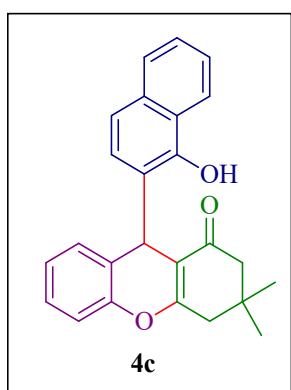

White solid. M.p.: 200-202 °C.  $^1\text{H}$  NMR ( $\text{CDCl}_3$ , 400 MHz):  $\delta = 9.21$  (s, 1H), 8.29 (d,  $J = 8.4$  Hz, 1H), 7.82 (d,  $J = 8$  Hz, 1H), 7.62 (t,  $J = 7.2$  Hz, 1H), 7.56-7.53 (m, 2H), 7.09-6.98 (m, 3H), 6.69-6.65 (m, 1H), 6.55 (dd,  $J = 1.4, 7.8$  Hz, 1H), 5.36 (s, 1H), 2.75 (dd,  $J = 17.6, 28$  Hz, 2H), 2.44 (dd,  $J = 16.6, 24.2$  Hz, 2H), 1.16 (s, 3H), 1.02 (s, 3H).  $^{13}\text{C}$  NMR ( $\text{CDCl}_3$ , 100 MHz):  $\delta = 200.8, 166.9, 153.5, 145.0, 133.3, 132.9, 130.0, 127.9, 127.8, 127.2, 126.6, 125.2, 123.3, 121.2,$

120.8, 119.4, 118.7, 114.0, 50.2, 41.7, 32.3, 31.0, 29.0, 27.3. HRMS (ESI)  $m/z$  calcd. for  $C_{25}H_{22}O_3$   $[M+H]^+$  371.1647, Found 371.1633.

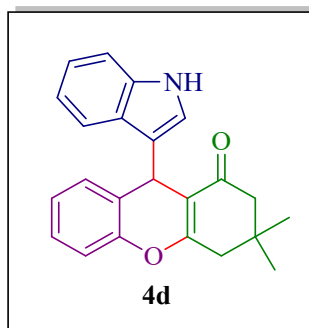

Red solid. M.p.: 178-180 °C.  $^1H$  NMR ( $CDCl_3$ , 400 MHz):  $\delta$  = 8.21 (s, 1H), 7.60 (d,  $J$  = 8 Hz, 1H), 7.47 (t,  $J$  = 4.2 Hz, 2H), 7.38-7.36 (m, 2H), 7.34-7.32 (m, 1H), 7.29-7.27 (m, 1H), 7.20-7.15 (m, 2H), 5.51 (s, 1H), 2.82 (dd,  $J$  = 17.6, 28 Hz, 2H), 2.47 (dd,  $J$  = 16.4, 28 Hz, 2H), 1.30 (s, 3H), 1.16 (s, 3H).  $^{13}C$  NMR ( $CDCl_3$ , 100 MHz):  $\delta$  = 196.9, 163.8, 149.0, 136.0, 129.6, 126.9, 125.1, 124.7, 124.4, 121.8, 121.0, 119.9, 118.8, 118.5, 115.7, 112.1, 110.7, 50.4, 41.0, 31.6, 28.9, 28.5, 27.1. <sup>[1]</sup>

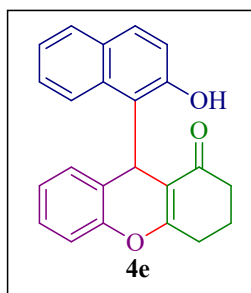

White solid. M.p.: 258-259 °C.  $^1H$  NMR ( $CDCl_3$ , 400 MHz):  $\delta$  = 9.44 (s, 1H), 7.80 (t,  $J$  = 7 Hz, 2H), 7.66 (d,  $J$  = 7.6 Hz, 1H), 7.41-7.32 (m, 3H), 7.02 (d,  $J$  = 3.6 Hz, 2H), 6.64-6.57 (m, 2H), 5.76 (s, 1H), 2.81-2.66 (m, 2H), 2.60-2.44 (m, 2H), 2.14-1.96 (m, 2H).  $^{13}C$  NMR ( $CDCl_3$ , 100 MHz):  $\delta$  = 201.0, 168.6, 153.0, 147.8, 132.6, 131.5, 131.0, 129.1, 128.9, 128.2, 128.0, 127.5, 125.2, 123.4, 121.4, 118.7, 117.5, 116.5, 115.1, 36.3, 28.1, 27.9, 19.9. <sup>[1]</sup>

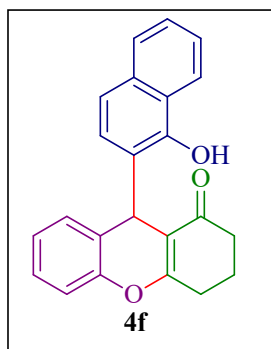

White solid. M.p.: 207-209 °C.  $^1\text{H}$  NMR ( $\text{CDCl}_3$ , 400 MHz):  $\delta$  = 9.36 (s, 1H), 8.31 (d,  $J$  = 8.4 Hz, 1H), 7.83 (d,  $J$  = 8 Hz, 1H), 7.63 (t,  $J$  = 7.4 Hz, 1H), 7.57-7.53 (m, 2H), 7.08-6.98 (m, 3H), 6.69 (t,  $J$  = 7.4 Hz, 1H), 6.53 (d,  $J$  = 8 Hz, 1H), 5.35 (s, 1H), 2.92-2.74 (m, 2H), 2.61-2.45 (m, 2H), 2.17-1.98 (m, 2H).  $^{13}\text{C}$  NMR ( $\text{CDCl}_3$ , 100 MHz):  $\delta$  = 201.1, 168.8, 153.6, 145.0, 133.3, 132.8, 130.1, 128.0, 127.8, 127.2, 126.66, 126.65, 125.3, 123.3, 121.0, 120.8, 119.4, 118.6, 115.3, 36.4, 31.1, 28.0, 19.9. HRMS (ESI)  $m/z$  calcd. for  $\text{C}_{23}\text{H}_{18}\text{O}_3$   $[\text{M}+\text{H}]^+$  343.1334, Found 343.1329.

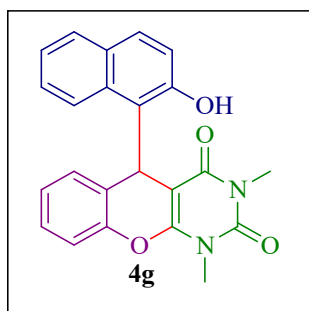

Yellow solid. M.p.: 208-210 °C.  $^1\text{H}$  NMR ( $\text{CDCl}_3$ , 400 MHz):  $\delta$  = 9.44 (s, 1H), 7.71-7.68 (m, 2H), 7.42 (d,  $J$  = 8 Hz, 1H), 7.34 (d,  $J$  = 8.8 Hz, 1H), 7.20 (d,  $J$  = 3.2 Hz, 2H), 7.18-7.12 (m, 2H), 6.97-6.93 (m, 1H), 6.88 (d,  $J$  = 7.6 Hz, 1H), 6.05 (s, 1H), 3.68 (s, 3H), 3.30 (s, 3H).  $^{13}\text{C}$  NMR ( $\text{CDCl}_3$ , 100 MHz):  $\delta$  = 164.6, 153.7, 153.2, 150.1, 149.1, 131.8, 130.7, 130.0, 129.8, 129.1, 128.3, 126.3, 125.7, 124.6, 122.7, 122.6, 122.2, 121.0, 115.8, 89.3, 30.6, 29.4, 28.5. <sup>[1]</sup>

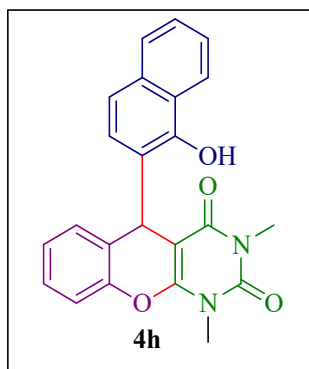

Orange solid. M.p.: 148-150 °C.  $^1\text{H}$  NMR ( $\text{CDCl}_3$ , 400 MHz):  $\delta$  = 10.09 (s, 1H), 8.45 (d,  $J$  = 8.4 Hz, 1H), 7.66 (d,  $J$  = 8 Hz, 1H), 7.50- 7.46 (m, 1H), 7.44-7.40 (m, 1H), 7.36-7.27 (m, 2H), 7.20 (d,  $J$  = 8.8 Hz, 1H), 7.18-7.14 (m, 1H), 7.09-7.07 (m, 1H), 6.61 (d,  $J$  = 8.8 Hz, 1H), 5.69 (s, 1H), 3.59 (s, 3H), 3.34 (s, 3H).  $^{13}\text{C}$  NMR ( $\text{CDCl}_3$ , 100 MHz):  $\delta$  = 165.0, 153.4, 149.9, 149.8, 149.5, 133.4, 130.7, 128.5, 127.0, 126.8, 126.3, 126.1, 125.6, 125.4, 124.1, 123.4, 120.8, 116.2, 90.6, 31.9, 29.3, 28.6. HRMS (ESI)  $m/z$  calcd. for  $\text{C}_{23}\text{H}_{18}\text{N}_2\text{O}_4$   $[\text{M}+\text{Na}]^+$  409.1164, Found 409.1157.

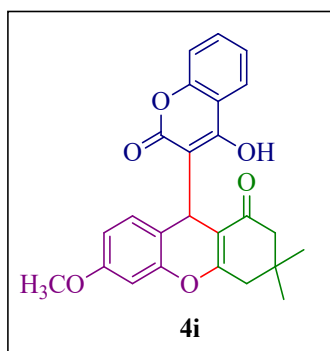

Yellow solid. M.p.: 246-248 °C.  $^1\text{H}$  NMR ( $\text{CDCl}_3$ , 400 MHz):  $\delta$  = 11.02 (s, 1H), 8.01 (d,  $J$  = 7.6 Hz, 1H), 7.49 (t,  $J$  = 7.6 Hz, 1H), 7.30 (t,  $J$  = 7.2 Hz, 1H), 7.20 (d,  $J$  = 8.4 Hz, 1H), 6.94 (d,  $J$  = 8.4 Hz, 1H), 6.66 (s, 1H), 6.61 (d,  $J$  = 8.4 Hz, 1H), 5.02 (s, 1H), 3.78 (s, 3H), 2.67 (dd,  $J$  = 17.8, 42.2 Hz, 2H), 2.43 (dd,  $J$  = 16.8, 26 Hz, 2H), 1.15 (s, 3H), 1.05 (s, 3H).  $^{13}\text{C}$  NMR ( $\text{CDCl}_3$ , 100 MHz):  $\delta$  = 201.3, 169.9, 161.1, 160.7, 159.4, 153.0, 151.8, 131.5, 128.9, 124.1, 123.6, 117.0, 116.1, 114.1, 111.4, 110.2, 109.1, 101.3, 55.4, 49.8, 41.6, 32.3, 29.2, 27.9, 27.1. <sup>[1]</sup>

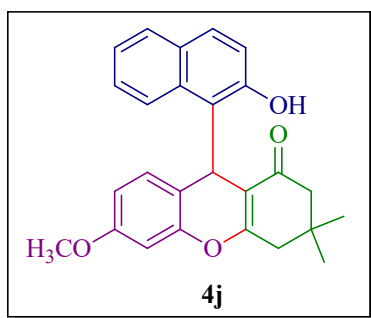

White solid. M.p.: 255-257 °C.  $^1\text{H}$  NMR ( $\text{CDCl}_3$ , 400 MHz):  $\delta$  = 9.40 (s, 1H), 7.79 (d  $J$  = 8.4 Hz, 2H), 7.67 (d,  $J$  = 8 Hz, 1H), 7.43-7.36 (m, 2H), 7.33 (d,  $J$  = 8.8 Hz, 1H), 6.57 (s, 1H), 6.48 (d,  $J$  = 8.8 Hz, 1H), 6.20 (d,  $J$  = 8.4 Hz, 1H), 5.67 (s, 1H), 3.68 (s, 3H), 2.60 (s, 2H), 2.44 (dd,  $J$  = 16.6, 24.2 Hz, 2H), 1.15 (s, 3H), 1.00 (s, 3H).  $^{13}\text{C}$  NMR ( $\text{CDCl}_3$ , 100 MHz):  $\delta$  = 200.8, 166.6, 159.2, 153.8, 147.8, 131.5, 131.0, 129.3, 129.0, 128.2, 127.4, 125.2, 125.1, 123.5, 117.5, 116.5, 114.0, 108.1, 103.4, 55.1, 50.2, 41.5, 32.4, 29.0, 27.5, 27.2. <sup>[2]</sup>

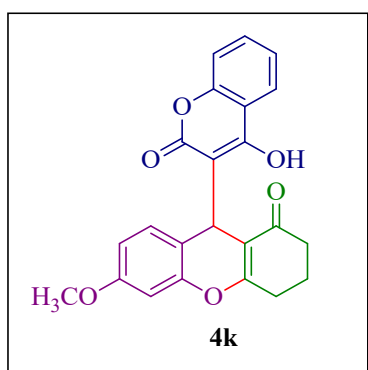

White solid. M.p.: 186-188°C.  $^1\text{H}$  NMR ( $\text{CDCl}_3$ , 400 MHz):  $\delta$  = 11.15 (s, 1H), 8.00 (dd,  $J$  = 1.4, 7.8 Hz, 1H), 7.49-7.45 (m, 1H), 7.29-7.27 (m, 1H), 7.20 (d,  $J$  = 8.4 Hz, 1H), 6.93 (d,  $J$  = 8.4 Hz, 1H), 6.66 (d,  $J$  = 2.4 Hz, 1H), 6.61 (dd,  $J$  = 2.6, 8.6 Hz, 1H), 5.02 (s, 1H), 3.78 (s, 3H), 2.85-2.78 (m, 1H), 2.69-2.57 (m, 1H), 2.55-2.43 (m, 2H), 2.13-1.97 (m, 2H).  $^{13}\text{C}$  NMR ( $\text{CDCl}_3$ , 100 MHz):  $\delta$  = 201.8, 171.6, 161.2, 160.8, 159.4, 152.9, 151.7, 131.5, 128.9, 124.1, 123.6, 117.0, 116.1, 114.3, 111.6, 111.3, 109.2, 101.2, 55.4, 35.9, 28.04, 28.00, 19.9. <sup>[1]</sup>



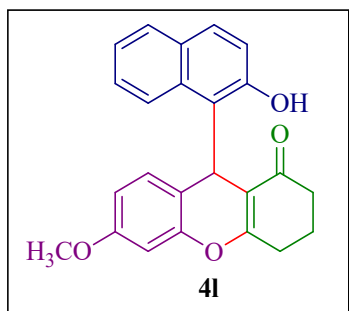

White solid. M.p.: 232-234 °C.  $^1\text{H}$  NMR ( $\text{CDCl}_3$ , 400 MHz):  $\delta$  = 9.55 (s, 1H), 7.79-7.77 (m, 2H), 7.66 (d,  $J$  = 8 Hz, 1H), 7.42-7.35 (m, 2H), 7.34 (d,  $J$  = 8.8 Hz, 1H), 6.57 (s, 1H), 6.45 (d,  $J$  = 8.8 Hz, 1H), 6.20 (d,  $J$  = 8.8 Hz, 1H), 5.67 (s, 1H), 3.68 (s, 3H), 2.81-2.66 (m, 2H), 2.61-2.44 (m, 2H), 2.17-1.96 (m, 2H).  $^{13}\text{C}$  NMR ( $\text{CDCl}_3$ , 100 MHz):  $\delta$  = 201.2, 168.5, 159.3, 154.0, 147.8, 131.5, 131.0, 129.5, 129.0, 128.2, 127.4, 125.2, 125.1, 123.4, 117.5, 116.5, 115.3, 108.0, 103.3, 55.1, 36.3, 27.8, 27.6, 19.9. <sup>[2]</sup>

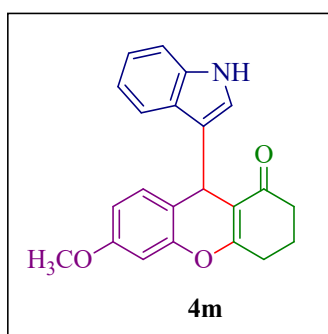

White solid. M.p.: 206-208 °C.  $^1\text{H}$  NMR ( $\text{CDCl}_3$ , 400 MHz):  $\delta$  = 7.97 (s, 1H), 7.41-7.36 (m, 2H), 7.25-7.24 (m, 1H), 7.21-7.17 (m, 1H), 7.14 (d,  $J$  = 2.4 Hz, 1H), 7.00-6.95 (m, 3H), 5.27 (s, 1H), 3.76 (s, 3H), 2.77-2.61 (m, 2H), 2.40-2.27 (m, 2H), 2.04-1.89 (m, 2H).  $^{13}\text{C}$  NMR ( $\text{CDCl}_3$ , 100 MHz):  $\delta$  = 197.4, 165.8, 158.8, 150.1, 136.5, 130.6, 125.7, 122.4, 121.5, 120.7, 119.3, 119.1, 117.4, 114.3, 111.5, 111.1, 101.1, 55.4, 37.0, 28.9, 27.8, 20.4. HRMS (ESI)  $m/z$  calcd. for  $\text{C}_{22}\text{H}_{19}\text{NO}_3$   $[\text{M}+\text{Na}]^+$  368.1263, Found 368.1255. <sup>[2]</sup>

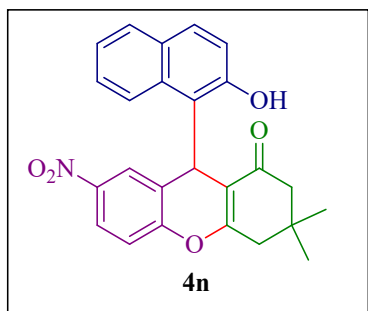

White solid. M.p.: 246-248 °C.  $^1\text{H}$  NMR ( $\text{CDCl}_3$ , 400 MHz):  $\delta$  = 10.46 (s, 1H), 7.93 (d,  $J$  = 9.2 Hz, 1H), 7.86 (d,  $J$  = 9.2 Hz, 1H), 7.82-7.81 (m, 1H), 7.49-7.45 (m, 2H), 7.41-7.38 (m, 3H), 7.10 (d,  $J$  = 9.2 Hz, 1H), 5.75 (s, 1H), 2.72 (dd,  $J$  = 17.8, 26.2 Hz, 2H), 2.48 (dd,  $J$  = 16.8, 25.6 Hz, 2H), 1.17 (s, 3H), 1.01 (s, 3H).  $^{13}\text{C}$  NMR ( $\text{CDCl}_3$ , 100 MHz):  $\delta$  = 201.3, 168.3, 159.5, 147.9, 142.0, 133.1, 131.7, 130.5, 130.0, 128.7, 127.7, 125.5, 125.2, 124.3, 122.7, 119.3, 116.8, 115.7, 112.7, 50.0, 41.6, 32.4, 29.0, 28.2, 27.2. <sup>[2]</sup>

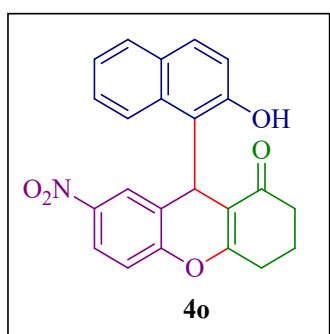

Light Yellow solid. M.p.: 376-378 °C.  $^1\text{H}$  NMR ( $\text{CDCl}_3$ , 400 MHz):  $\delta$  = 10.57 (s, 1H), 7.94 (dd,  $J$  = 2.4, 9.2 Hz, 1H), 7.86 (d,  $J$  = 8.8 Hz, 1H), 7.83-7.81 (m, 1H), 7.50-7.48 (m, 1H), 7.44-7.39 (m, 4H), 7.09 (d,  $J$  = 8.8 Hz, 1H), 5.75 (s, 1H), 2.90-2.71 (m, 2H), 2.65-2.48 (m, 2H), 2.19-2.02 (m, 2H).  $^{13}\text{C}$  NMR ( $\text{CDCl}_3$ , 100 MHz):  $\delta$  = 201.6, 169.9, 159.5, 147.9, 142.0, 133.1, 131.7, 130.4, 130.0, 128.7, 127.7, 125.5, 125.4, 124.3, 122.7, 119.2, 116.8, 115.8, 113.9, 36.2, 28.3, 28.0, 19.8. <sup>[2]</sup>

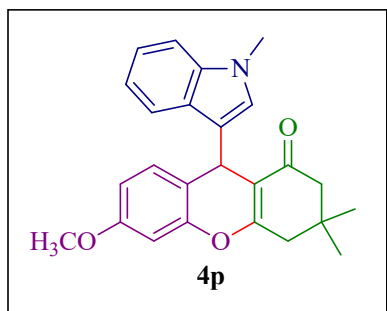

Orange solid, M.p.: 160-162 °C.  $^1\text{H}$  NMR ( $\text{CDCl}_3$ , 400 MHz):  $\delta$  = 7.40-7.30 (m, 2H), 7.25-7.17 (m, 2H), 7.11-7.00 (m, 3H), 6.96 (t,  $J$  = 7.4 Hz, 1H), 5.21 (s, 1H), 3.76 (s, 3H), 3.69 (s, 3H), 2.60 (dd,  $J$  = 17.2, 29.6 Hz, 2H), 2.25 (dd,  $J$  = 16.4, 26.0 Hz, 2H), 1.09 (s, 3H), 0.95 (s, 3H).  $^{13}\text{C}$  NMR ( $\text{CDCl}_3$ , 100 MHz):  $\delta$  = 200.9, 166.7, 159.3, 154.5, 133.2, 130.6, 127.8, 127.3, 126.6, 125.3, 125.2, 123.3, 120.8, 119.5, 114.2, 107.9, 103.2, 55.1, 50.3, 41.7, 32.4, 30.9, 30.5, 29.0, 27.4. <sup>[3]</sup>

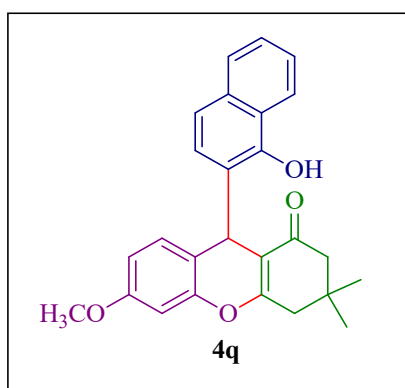

Orange solid. M.p.: 200-202 °C.  $^1\text{H}$  NMR ( $\text{CDCl}_3$ , 400 MHz):  $\delta$  = 9.33 (s, 1H), 8.29 (d,  $J$  = 8.4 Hz, 1H), 7.83 (d,  $J$  = 8 Hz, 1H), 7.63-7.59 (m, 1H), 7.56 (d,  $J$  = 8.4 Hz, 2H), 7.05 (d,  $J$  = 8.4 Hz, 1H), 6.56 (d,  $J$  = 2.4 Hz, 1H), 6.41 (d,  $J$  = 8.8 Hz, 1H), 6.26 (dd,  $J$  = 2.4, 8.8 Hz, 1H), 5.26 (s, 1H), 3.71 (s, 3H), 2.75 (dd,  $J$  = 17.6, 28.4 Hz, 2H), 2.44 (dd,  $J$  = 16.8, 22.8 Hz, 2H), 1.16 (s, 3H), 1.03 (s, 3H).  $^{13}\text{C}$  NMR ( $\text{CDCl}_3$ , 100 MHz):  $\delta$  = 200.8, 166.6, 159.3, 153.9, 147.8, 131.5, 131.1, 129.3, 128.2, 127.4, 125.2, 123.5, 117.5, 116.5, 114.1, 108.2, 103.4, 55.1, 50.2, 41.6, 32.4, 29.0, 27.5, 27.2. HRMS (ESI)  $m/z$  calcd. for  $\text{C}_{26}\text{H}_{24}\text{O}_4$   $[\text{M}+\text{Na}]^+$  423.1572, Found 423.1563.

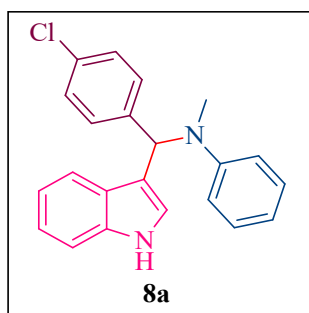

White solid, M.p.: 128-130 °C.  $^1\text{H}$  NMR ( $\text{CDCl}_3$ , 400 MHz):  $\delta$  = 7.91 (s, 1H), 7.33 (d,  $J$  = 8 Hz, 1H), 7.25-7.20 (m, 4H), 7.17-7.13 (m, 3H), 7.01-6.96 (m, 3H), 6.54-6.52 (m, 3H), 5.52 (s, 1H), 2.80 (s, 3H).  $^{13}\text{C}$  NMR ( $\text{CDCl}_3$ , 100 MHz):  $\delta$  = 147.7, 143.3, 136.7, 132.3, 131.6, 130.3, 129.6, 128.3, 126.9, 124.0, 122.1, 120.1, 119.9, 119.4, 112.4, 111.1, 47.3, 30.9. ESI MS:  $m/z$  347.48, 349.47  $[\text{M}+\text{H}]^+$ . [4]

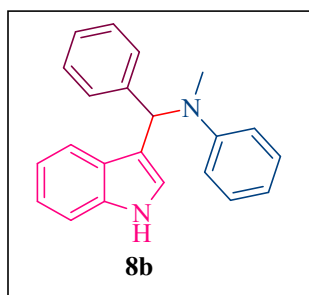

White solid, M.p.: 125-127 °C.  $^1\text{H}$  NMR ( $\text{CDCl}_3$ , 400 MHz):  $\delta$  = 7.82 (s, 1H), 7.25 (d,  $J$  = 8 Hz, 1H), 7.20-7.14 (m, 5H), 7.12-7.03 (m, 3H), 6.97 (d,  $J$  = 8.4 Hz, 2H), 6.91-6.84 (m, 1H), 6.47-6.45 (m, 3H), 5.48 (s, 1H), 2.72 (s, 3H).  $^{13}\text{C}$  NMR ( $\text{CDCl}_3$ , 100 MHz):  $\delta$  = 147.6, 144.7, 136.7, 133.0, 130.1, 129.7, 129.4, 128.9, 128.2, 128.1, 127.1, 126.0, 124.0, 121.9, 120.5, 120.0, 119.2, 112.5, 112.4, 111.0, 47.9, 30.9. [4]

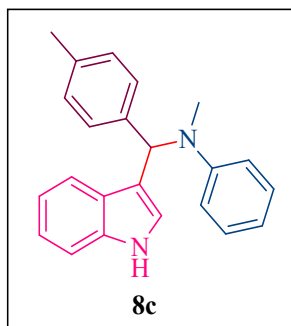

White solid, M.p.: 168-170 °C.  $^1\text{H}$  NMR ( $\text{CDCl}_3$ , 400 MHz):  $\delta$  = 7.87 (s, 1H), 7.31 (d,  $J$  = 8Hz, 1H), 7.25-7.22 (m, 1H), 7.15-7.11 (m, 8H), 6.98 (t,  $J$  = 7.4 Hz, 1H), 6.53 (m, 3H), 5.52 (s, 1H), 2.78 (s, 3H), 2.30 (s, 3H).  $^{13}\text{C}$  NMR ( $\text{CDCl}_3$ , 100 MHz):  $\delta$  = 147.5, 141.8, 136.7, 135.4, 133.2, 129.7, 128.9, 128.8, 127.1, 124.0, 121.9, 120.6, 120.1, 119.2, 112.4, 111.0, 47.5, 30.9, 21.1.<sup>[5]</sup>

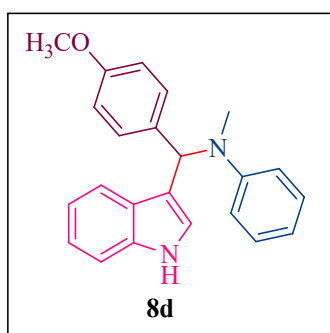

White solid, M.p.: 158-160 °C,  $^1\text{H}$  NMR ( $\text{CDCl}_3$ , 400 MHz):  $\delta$  = 7.93 (s, 1H), 7.35 (d,  $J$  = 8 Hz, 1H), 7.27 (s, 1H), 7.18-7.14 (m, 4H), 7.05 (d,  $J$  = 8.4 Hz, 2H), 7.00 (t,  $J$  = 7.4 Hz, 1H), 6.83 (d,  $J$  = 8.4 Hz, 2H), 6.58 (s, 1H), 6.56 (d,  $J$  = 8.4 Hz, 2H), 5.53 (s, 1H), 3.79 (s, 3H), 2.82 (s, 3H).  $^{13}\text{C}$  NMR ( $\text{CDCl}_3$ , 100 MHz):  $\delta$  = 157.7, 147.4, 136.9, 136.7, 133.4, 129.8, 129.6, 127.0, 123.8, 121.9, 120.9, 120.1, 119.2, 113.5, 112.4, 110.9, 55.2, 47.0, 31.0. HRMS (ESI)  $m/z$  calcd. for  $\text{C}_{23}\text{H}_{22}\text{N}_2\text{O}$  [ $\text{M}+\text{H}$ ]<sup>+</sup> 343.1810, Found 343.1811.

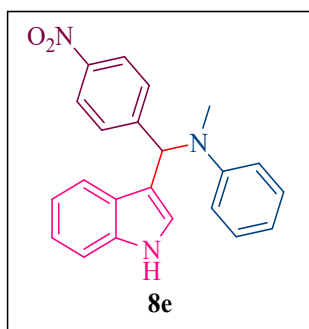

Yellow solid, M.p.: 93.95 °C,  $^1\text{H}$  NMR ( $\text{CDCl}_3$ , 400 MHz):  $\delta$  = 8.15 (d,  $J$  = 8.4 Hz, 2H), 8.08 (s, 1H), 7.41 (d,  $J$  = 8.8 Hz, 3H), 7.28-7.19 (m, 3H), 7.08-7.02 (m, 3H), 6.75 (m 2H), 6.60 (s, 1H), 5.68 (s, 1H), 2.87 (s, 3H).  $^{13}\text{C}$  NMR ( $\text{CDCl}_3$ , 100 MHz):  $\delta$  = 152.5, 148.1, 146.3, 136.7, 131.0, 129.7, 129.6, 126.6, 124.0, 123.5, 122.3, 119.67, 119.63, 119.1, 112.4, 111.2, 47.9, 30.7.  
[4]

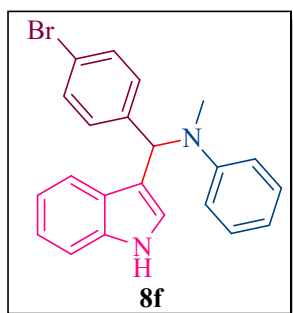

Red solid, M.p.: 136-138 °C.  $^1\text{H}$  NMR ( $\text{CDCl}_3$ , 400 MHz):  $\delta$  = 7.93 (s, 1H), 7.37-7.32 (m, 3H), 7.24-7.14 (m, 3H), 7.10 (d,  $J$  = 8 Hz, 2H), 7.01-6.99 (m, 3H), 6.55 (m, 3H), 5.51 (s, 1H), 2.80 (s, 3H).  $^{13}\text{C}$  NMR ( $\text{CDCl}_3$ , 100 MHz):  $\delta$  = 147.7, 143.8, 136.7, 132.2, 131.2, 130.7, 129.6, 126.8, 124.0, 122.1, 120.0, 119.9, 119.8, 119.4, 112.4, 111.1, 47.4, 30.9. HRMS (ESI)  $m/z$  calcd. for  $\text{C}_{22}\text{H}_{19}\text{BrN}_2$   $[\text{M}+\text{H}]^+$  391.0810, Found 391.0828.

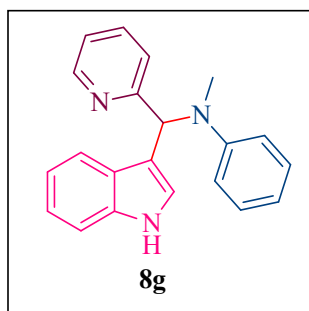

Yellow solid, M.p.: 125-127 °C.  $^1\text{H}$  NMR ( $\text{CDCl}_3$ , 400 MHz):  $\delta$  = 8.58 (d,  $J$  = 4.4 Hz, 1H), 8.08 (s, 1H), 7.57-7.53 (m, 1H), 7.32 (d,  $J$  = 8.0 Hz, 1H), 7.22-7.13 (m, 3H), 7.11 (d,  $J$  = 8.4 Hz, 3H), 7.01-6.94 (m, 2H), 6.67 (s, 1H), 6.56 (d,  $J$  = 8.4 Hz, 2H), 5.72 (s, 1H), 2.80 (s, 3H).  $^{13}\text{C}$  NMR ( $\text{CDCl}_3$ , 100 MHz):  $\delta$  = 164.0, 149.3, 147.8, 136.7, 136.4, 129.6, 127.0, 123.8, 122.0, 121.2, 119.8, 119.3, 112.5, 111.0, 50.6, 30.9. HRMS (ESI)  $m/z$  calcd. for  $\text{C}_{21}\text{H}_{19}\text{N}_3$   $[\text{M}+\text{H}]^+$  314.1657, Found 314.1638.

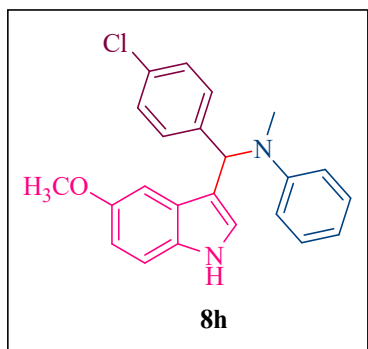

White solid, M.p.: 110-112 °C.  $^1\text{H}$  NMR ( $\text{CDCl}_3$ , 400 MHz):  $\delta$  = 7.85 (s, 1H), 7.24-7.21 (m, 4H), 7.16 (d,  $J$  = 8 Hz, 2H), 7.01 (d,  $J$  = 8.4 Hz, 2H), 6.83 (dd,  $J$  = 2.2, 8.6 Hz, 1H), 6.63 (d,  $J$  = 1.6 Hz, 1H), 6.55 (d,  $J$  = 8 Hz, 3H), 5.47 (s, 1H), 3.68 (s, 3H), 2.80 (s, 3H).  $^{13}\text{C}$  NMR ( $\text{CDCl}_3$ , 100 MHz):  $\delta$  = 153.7, 147.7, 143.2, 132.3, 131.9, 131.6, 130.3, 129.6, 128.3, 127.3, 124.8, 119.7, 112.4, 112.0, 111.7, 101.9, 55.8, 47.3, 30.9. <sup>[5]</sup>

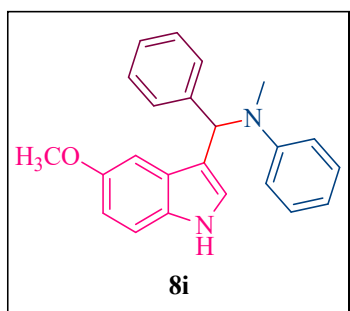

White solid, M.p.: 108-110 °C.  $^1\text{H}$  NMR ( $\text{CDCl}_3$ , 400 MHz):  $\delta$  = 7.81 (s, 1H), 7.27-7.16 (m, 7H), 7.05 (d,  $J$  = 8.4 Hz, 2H), 6.81 (dd,  $J$  = 2.2, 8.6 Hz, 1H), 6.65 (d,  $J$  = 2.4 Hz, 1H), 6.54 (d,  $J$  = 8.4 Hz, 3H), 5.50 (s, 1H), 3.66 (s, 3H), 2.79 (s, 3H).  $^{13}\text{C}$  NMR ( $\text{CDCl}_3$ , 100 MHz):  $\delta$  = 153.6, 147.6, 144.6, 132.8, 131.8, 129.7, 128.9, 128.1, 127.5, 125.9, 124.7, 120.2, 112.4, 111.9, 111.6, 102.0, 55.7, 47.9, 30.9. <sup>[6]</sup>

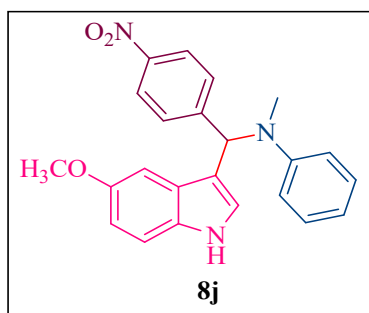

Yellow solid, M.p.: 102-105 °C. <sup>1</sup>H NMR (CDCl<sub>3</sub>, 400 MHz): δ = 8.11 (d, *J* = 8.8 Hz, 2H), 7.99 (s, 1H), 7.38 (d, *J* = 8 Hz, 3H), 7.24 (d, *J* = 8.8 Hz, 1H), 7.00 (d, *J* = 8.4 Hz, 2H), 6.84 (dd, *J* = 2.4, 8.8 Hz, 1H), 6.60 (d, *J* = 2.4 Hz, 1H), 6.56-6.54 (m, 3H), 5.58 (s, 1H), 3.67 (s, 3H), 2.80 (s, 3H). <sup>13</sup>C NMR (CDCl<sub>3</sub>, 100 MHz): δ = 153.8, 152.6, 148.1, 146.2, 131.9, 131.0, 129.7, 129.6, 127.0, 124.9, 123.5, 118.5, 112.5, 112.1, 112.0, 101.6, 55.8, 47.8, 30.8. HRMS (ESI) *m/z* calcd. for C<sub>23</sub>H<sub>21</sub>N<sub>3</sub>O<sub>3</sub> [M+H]<sup>+</sup> 388.1661, Found 388.1643.

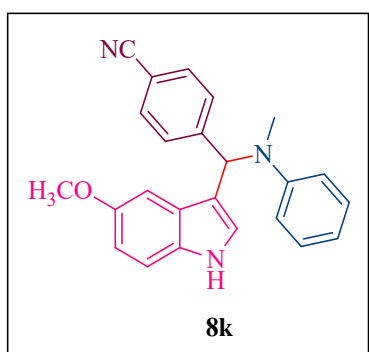

White solid, M.p.: 145-148 °C. <sup>1</sup>H NMR (CDCl<sub>3</sub>, 400 MHz): δ = 7.93 (s, 1H), 7.55 (d, *J* = 8 Hz, 2H), 7.34 (d, *J* = 8 Hz, 3H), 7.25 (d, *J* = 8.4 Hz, 1H), 6.99 (d, *J* = 8.4 Hz, 2H), 6.84 (dd, *J* = 2, 8.4 Hz, 1H), 6.59 (d, *J* = 1.6 Hz, 1H), 6.56 (d, *J* = 8 Hz, 3H), 5.54 (s, 1H), 3.67 (s, 3H), 2.81 (s, 3H). <sup>13</sup>C NMR (CDCl<sub>3</sub>, 100 MHz): δ = 153.9, 150.1, 146.4, 132.8, 132.1, 131.8, 129.8, 129.7, 127.1, 124.8, 119.1, 118.6, 113.7, 112.2, 111.9, 109.9, 101.7, 55.8, 48.1, 31.6. HRMS (ESI) *m/z* calcd. for C<sub>24</sub>H<sub>21</sub>N<sub>3</sub>O [M+H]<sup>+</sup> 368.1763, Found 368.1756.



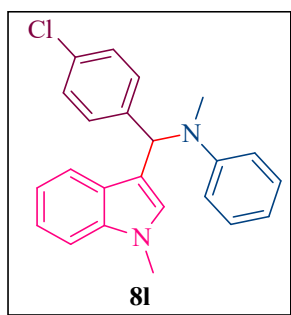

White solid, M.p.: 86-88 °C.  $^1\text{H}$  NMR ( $\text{CDCl}_3$ , 400 MHz):  $\delta = 7.21\text{-}7.06$  (m, 8H), 6.92-6.88 (m, 3H), 6.50 (d,  $J = 8.4$  Hz, 2H), 6.32 (s, 1H), 5.44 (s, 1H), 3.61 (s, 3H), 2.74 (s, 3H).  $^{13}\text{C}$  NMR ( $\text{CDCl}_3$ , 100 MHz):  $\delta = 147.4, 143.4, 137.4, 132.9, 131.6, 130.3, 129.6, 128.7, 128.3, 127.2, 121.6, 120.0, 118.8, 118.4, 112.8, 109.1, 47.3, 32.7, 31.2$ . HRMS (ESI)  $m/z$  calcd. for  $\text{C}_{23}\text{H}_{21}\text{N}_2\text{Cl}$   $[\text{M}+\text{H}]^+$  361.1472, Found 361.1450.

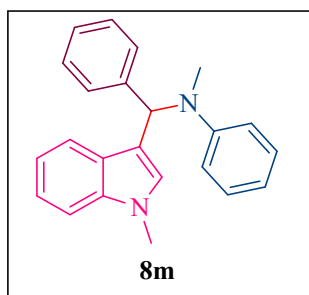

Light Pink solid, M.p.: 110-112 °C.  $^1\text{H}$  NMR ( $\text{CDCl}_3$ , 400 MHz):  $\delta = 7.27\text{-}7.21$  (m, 7H), 7.19 (t,  $J = 7.6$  Hz, 2H), 7.04 (d,  $J = 8.4$  Hz, 2H), 6.97 (t,  $J = 7.4$  Hz, 1H), 6.55 (d,  $J = 8.4$  Hz, 2H), 6.41 (s, 1H), 5.55 (s, 1H), 3.66 (s, 3H), 2.79 (s, 3H).  $^{13}\text{C}$  NMR ( $\text{CDCl}_3$ , 100 MHz):  $\delta = 147.5, 144.9, 137.5, 133.2, 129.8, 129.0, 128.8, 128.2, 127.5, 126.0, 121.6, 120.2, 119.0, 118.8, 112.5, 109.1, 48.0, 32.7, 31.1$ . <sup>[5]</sup>

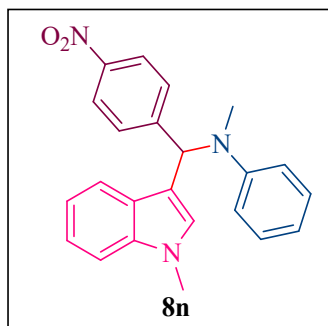

Yellow solid, M.p.: 146-148 °C. <sup>1</sup>H NMR (CDCl<sub>3</sub>, 400 MHz): δ = 8.12 (d, *J* = 8.8 Hz, 2H), 7.39 (d, *J* = 8.8 Hz, 2H), 7.31 (d, *J* = 8.4 Hz, 1H), 7.22 (t, *J* = 7.8 Hz, 1H), 7.17 (d, *J* = 8 Hz, 1H), 7.01-6.96 (m, 4H), 6.57 (d, *J* = 8.4 Hz, 2H), 6.42 (s, 1H), 5.63 (s, 1H), 3.71 (s, 3H), 2.82 (s, 3H). <sup>13</sup>C NMR (CDCl<sub>3</sub>, 100 MHz): δ = 152.7, 148.0, 146.3, 137.4, 131.2, 129.7, 129.6, 128.7, 127.0, 123.5, 121.8, 119.7, 119.0, 117.4, 112.5, 109.3, 47.8, 32.7, 30.9. HRMS (ESI) *m/z* calcd. for C<sub>23</sub>H<sub>21</sub>N<sub>3</sub>O<sub>2</sub> [M+H]<sup>+</sup> 372.1712, Found 372.1732.

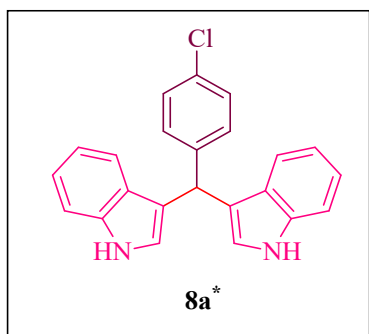

Red solid, M.p.: 80-82 °C. <sup>1</sup>H NMR (CDCl<sub>3</sub>, 400 MHz): δ = 7.92 (s, 2H), 7.40-7.34 (m, 6H), 7.25-7.27 (m, 1H), 7.22-7.14 (m, 3H), 7.02 (t, *J* = 7.4 Hz, 2H), 6.66 (d, *J* = 1.6 Hz, 2H), 5.88 (s, 1H), [7]

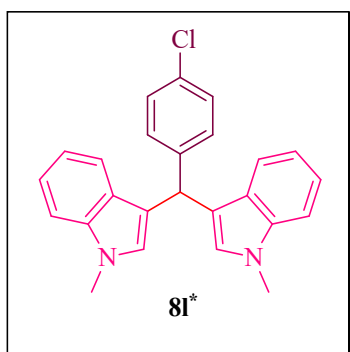

White solid, M.p.: 208-210 °C. <sup>1</sup>H NMR (CDCl<sub>3</sub>, 400 MHz): δ = 7.41 (d, *J* = 7.6 Hz, 2H), 7.36-7.24 (m, 8H), 7.07 (t, *J* = 7.4 Hz, 2H), 6.56 (s, 2H), 5.90 (s, 1H), 3.73 (s, 6H). [8]

## 5. References

1. P. P. Ghosh and A. R. Das, *J. Org. Chem.*, 2013, **78**, 6170–6181.
2. H. Ghavidel, B. Mirza and S. S. Amiri, *Polycycl aromat compd.*, 2021, **41**, 604-625.

3. M. Nourisefat, F. Panahi, M. Nabipour, S. Heidari and Ali K. Nezhad, *J. Iran Chem. Soc.*, 2016, **13**, 1853-1865.
4. A. Kumar, M. K. Gupta, M. Kumar and D. Saxena, *RSC Adv.*, 2013, **3**, 1673-1678.
5. P. Srihari, V. K. Singh, D. C. Bhunia and J. S. Yadav, *Tetrahedron Lett.*, 2009, **50**, 3763-3766.
6. U. C. Rajesh, J. Wang, S. Prescott, T. Tsuzuki and D. S. Rawat, *ACS Sustain. Chem. Eng.*, 2015, **3**, 9-18.
7. M. Esmailpour, B. Akhlaghinia, R. Jahanshahi, *J. Chem. Sci.*, 2017, **129**, 313–328.
8. X. S. Wang, M. Y. Yin, W. Wang, S. J. Tu, *Eur. J. Org. Chem.*, 2012, **2012**, 4811–4818.

## 6. <sup>1</sup>H and <sup>13</sup>C NMR spectra of compounds (4a-4q, 8a-8n and 8a\* & 8l\*)

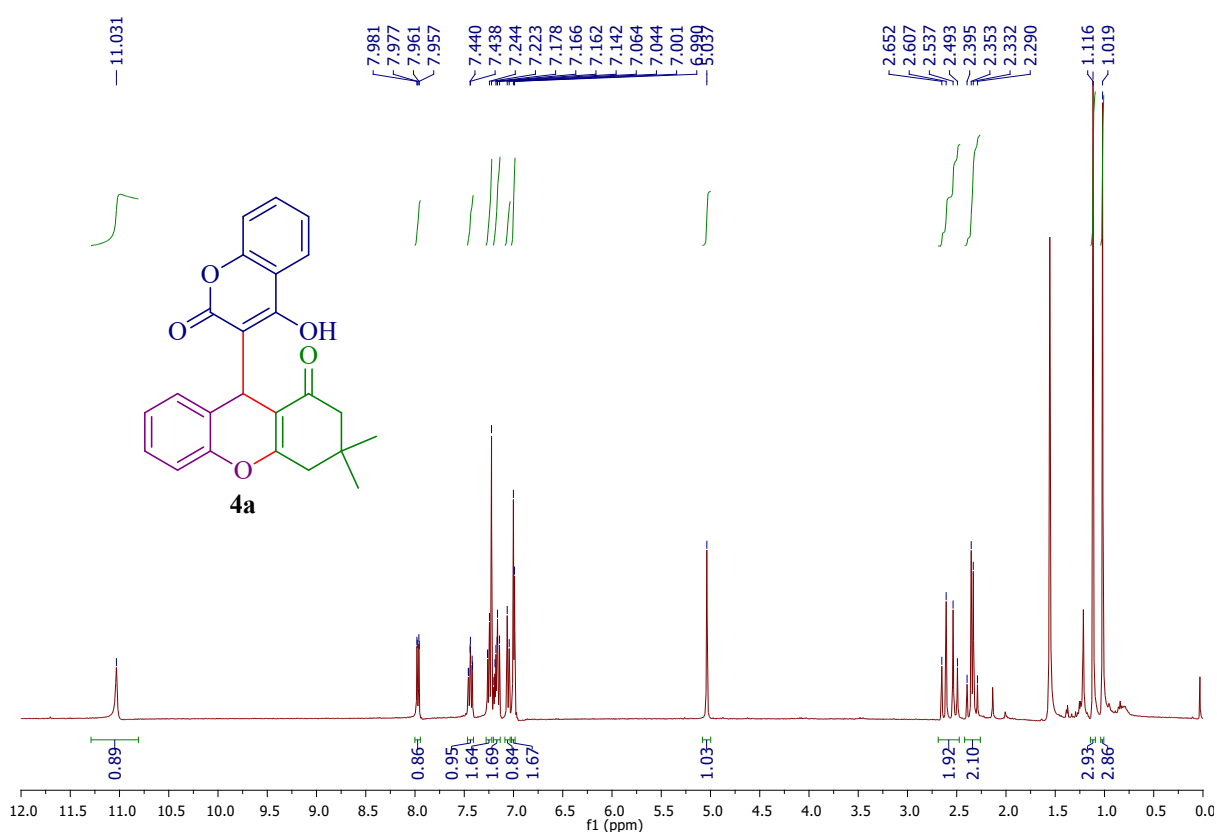

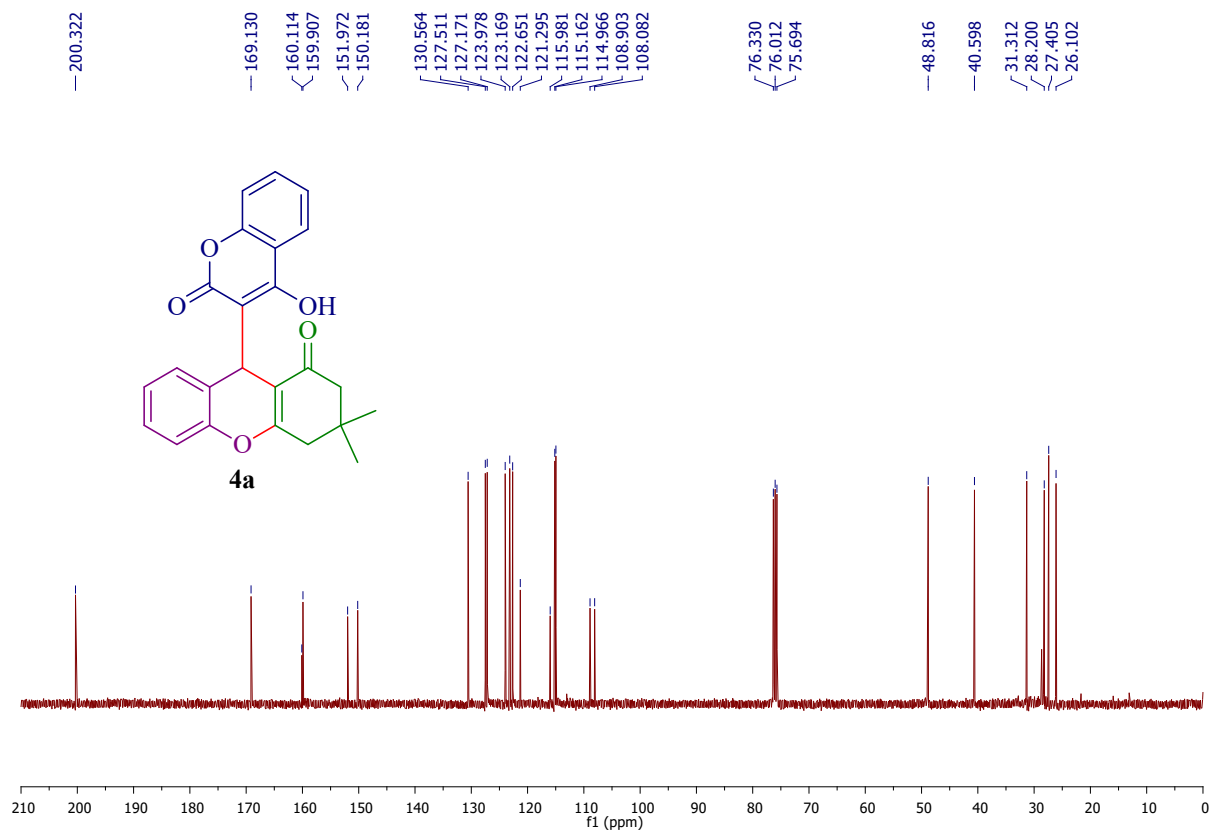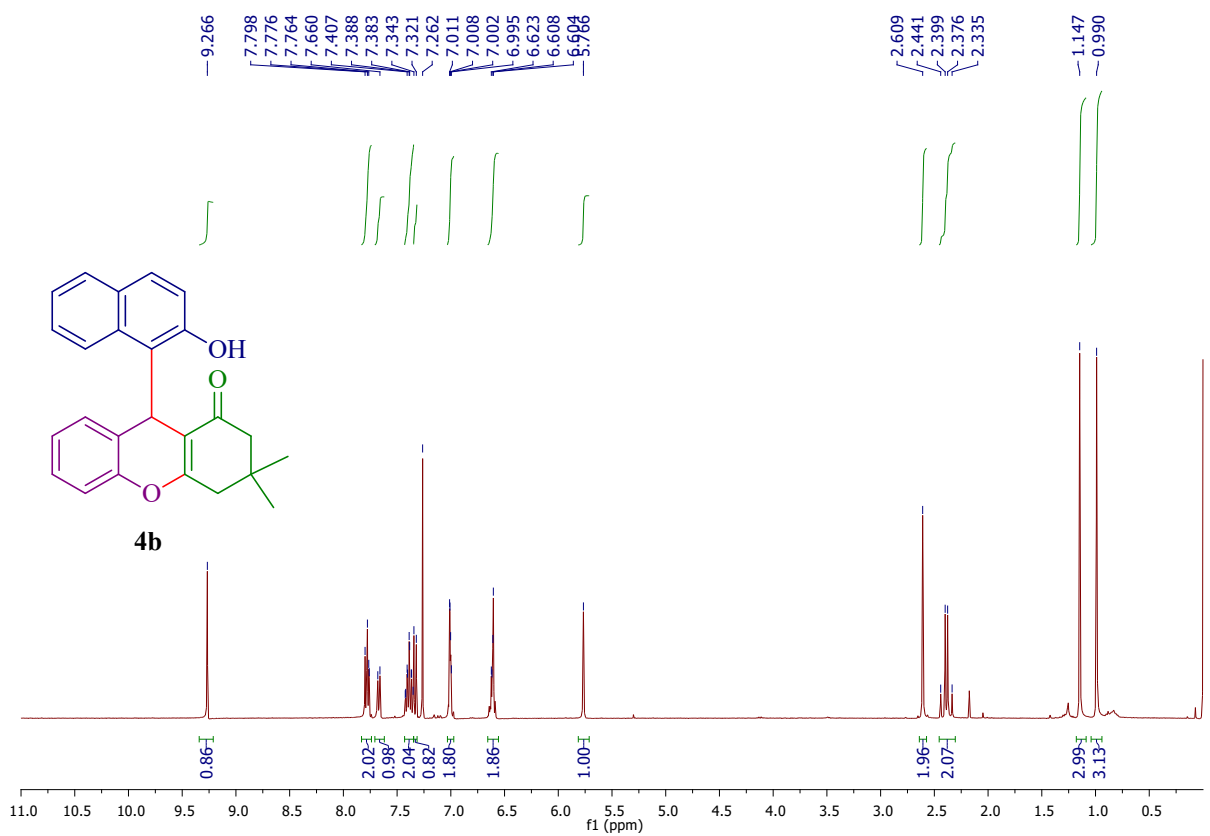

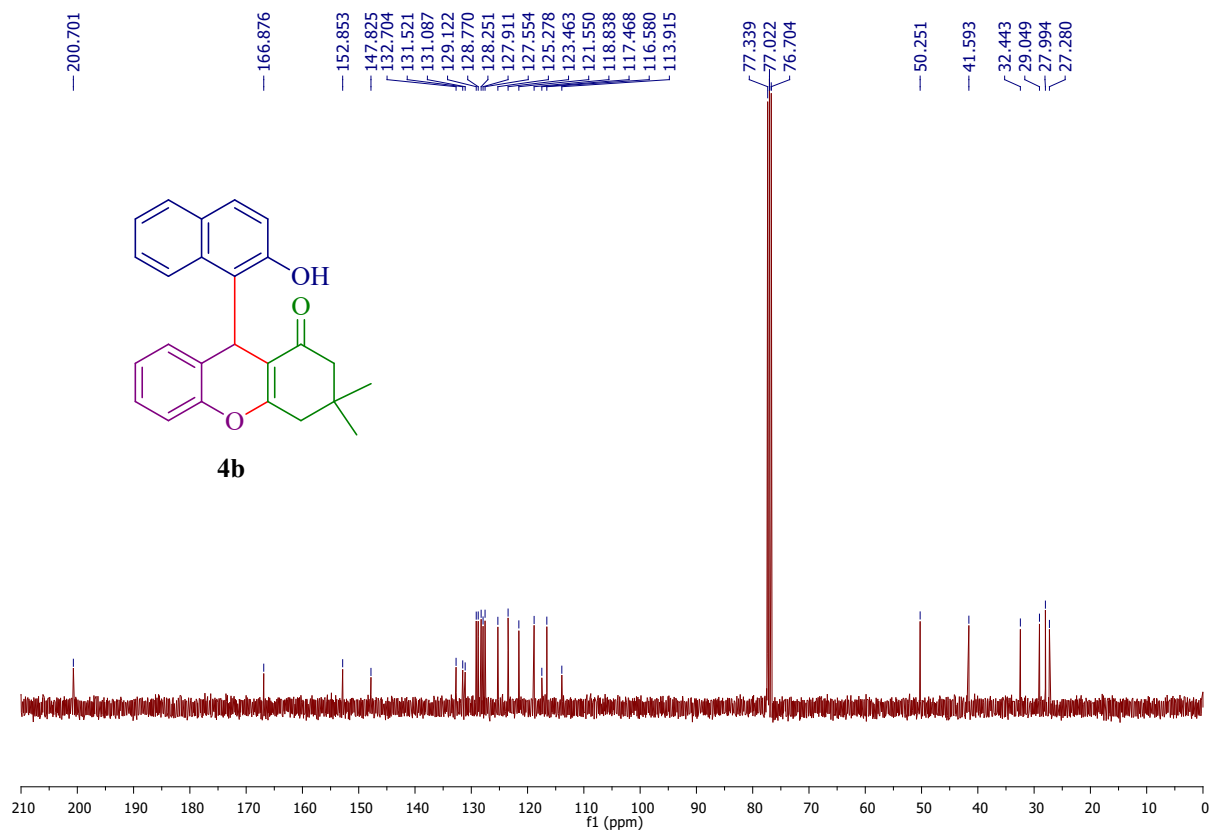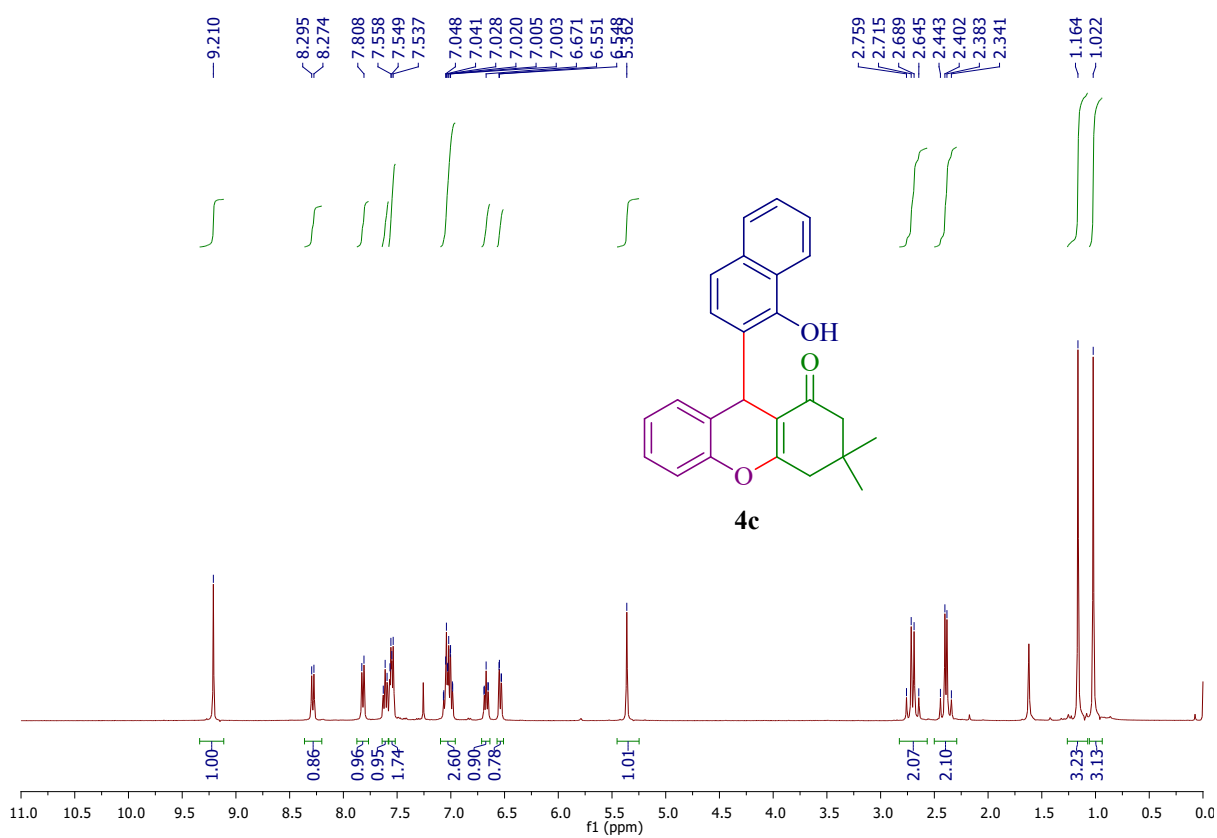

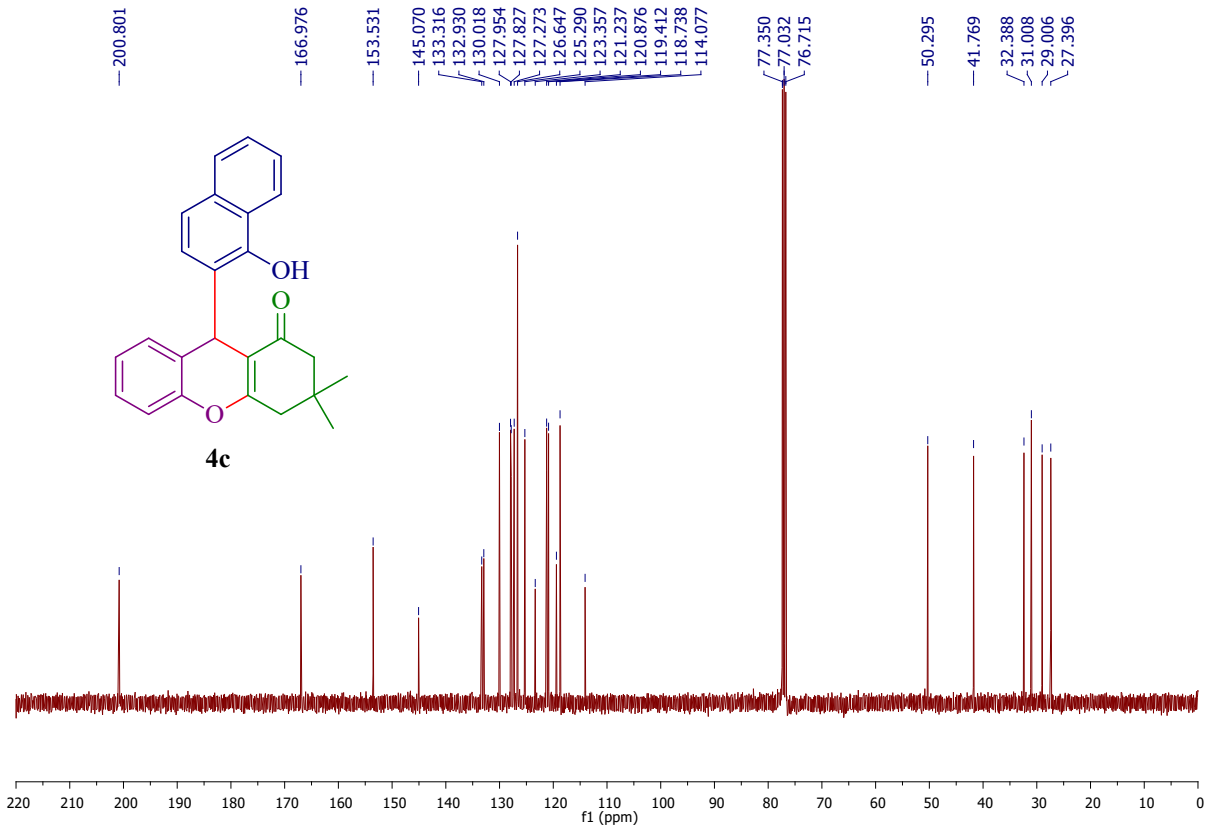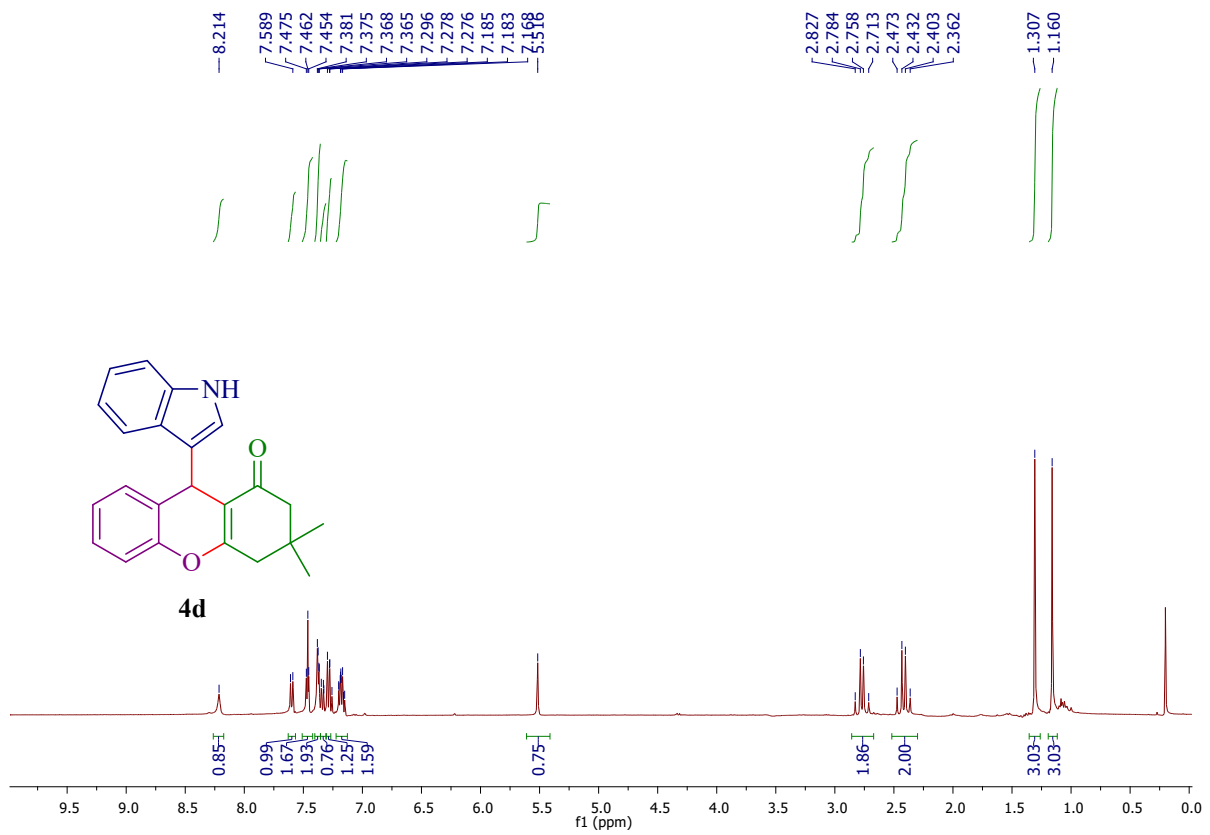

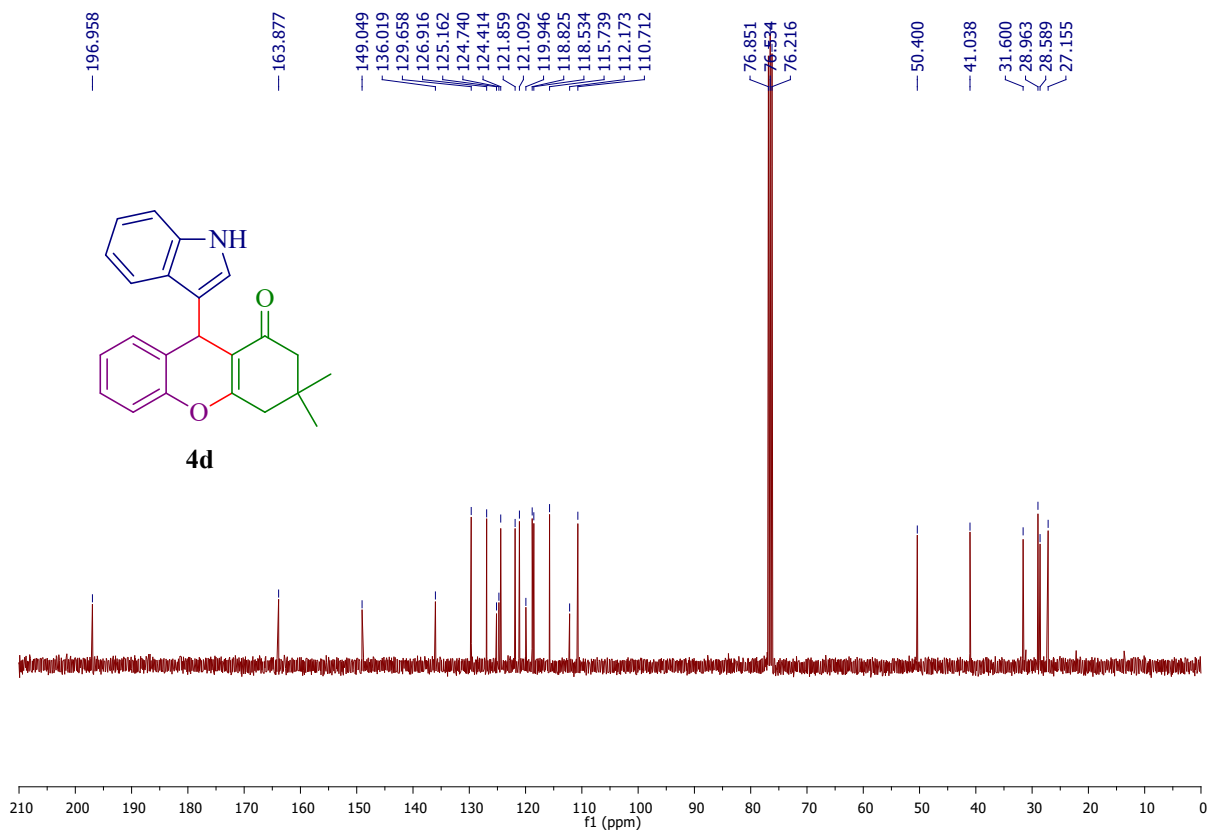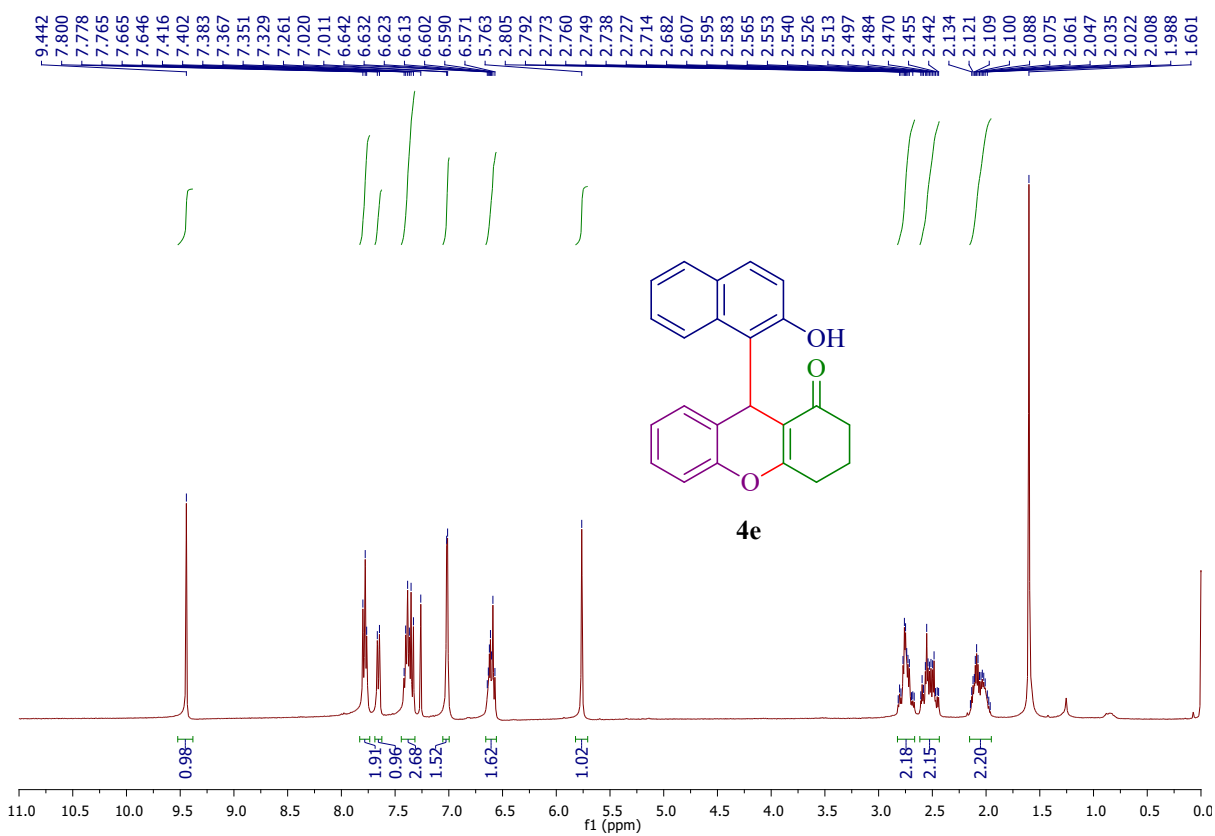

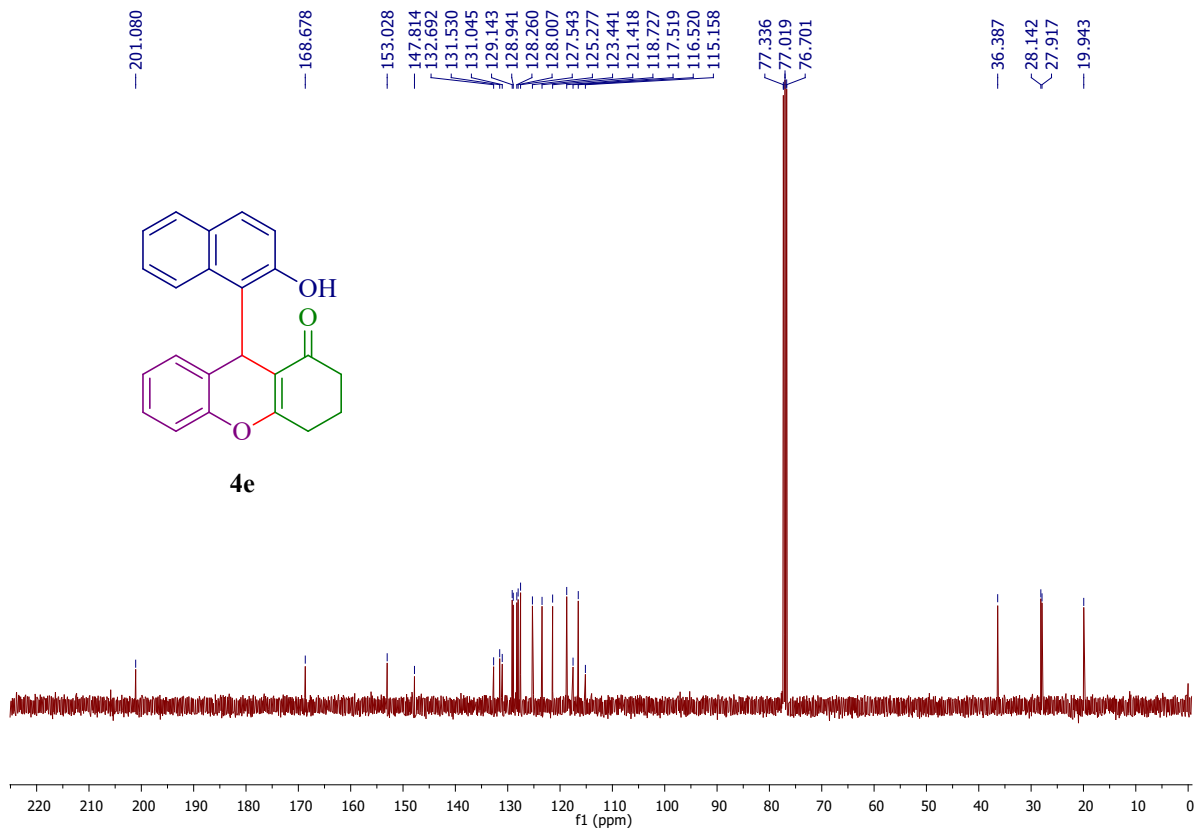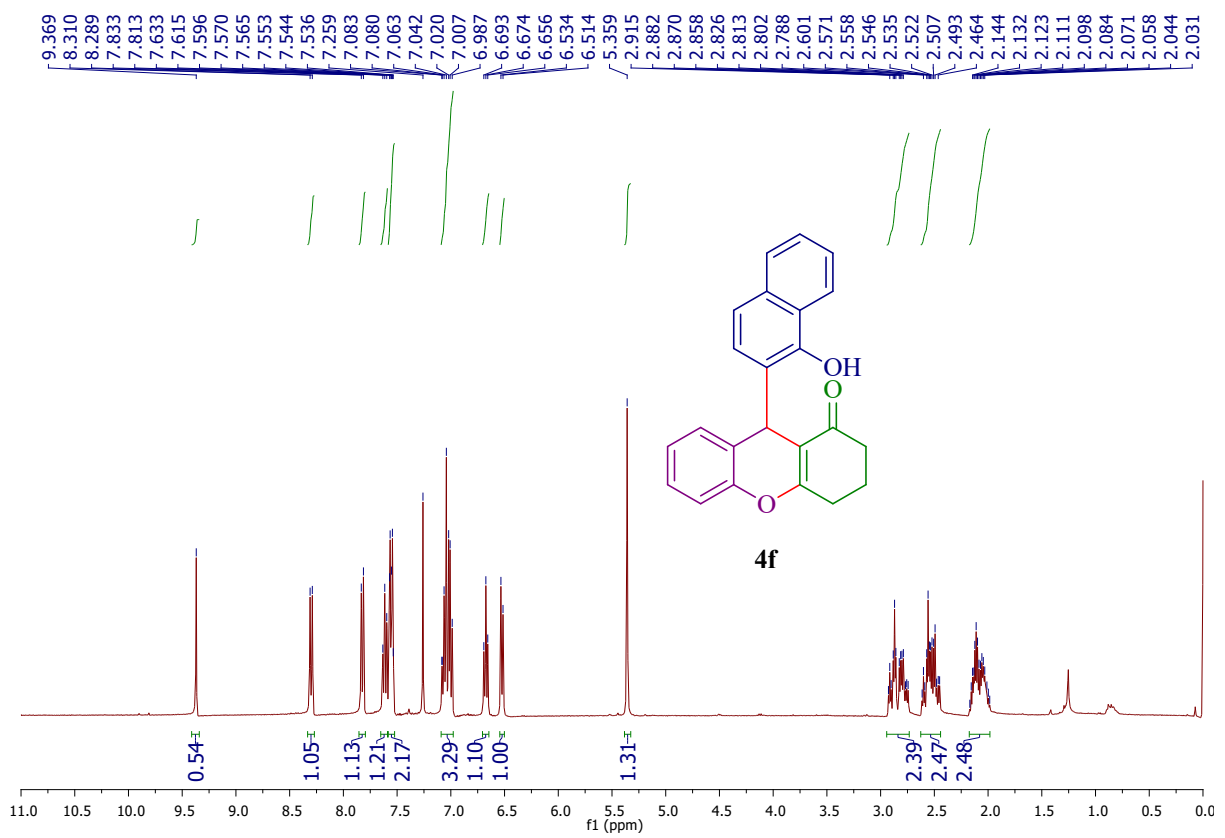



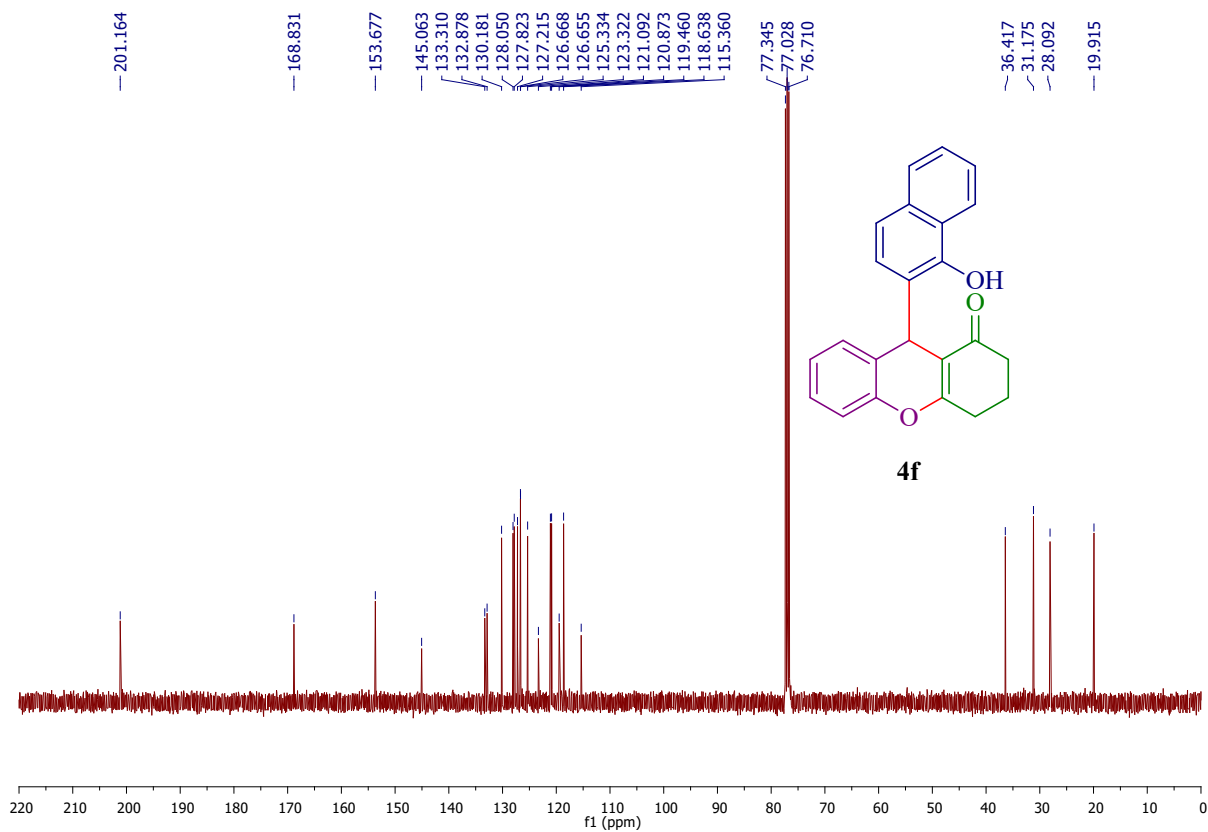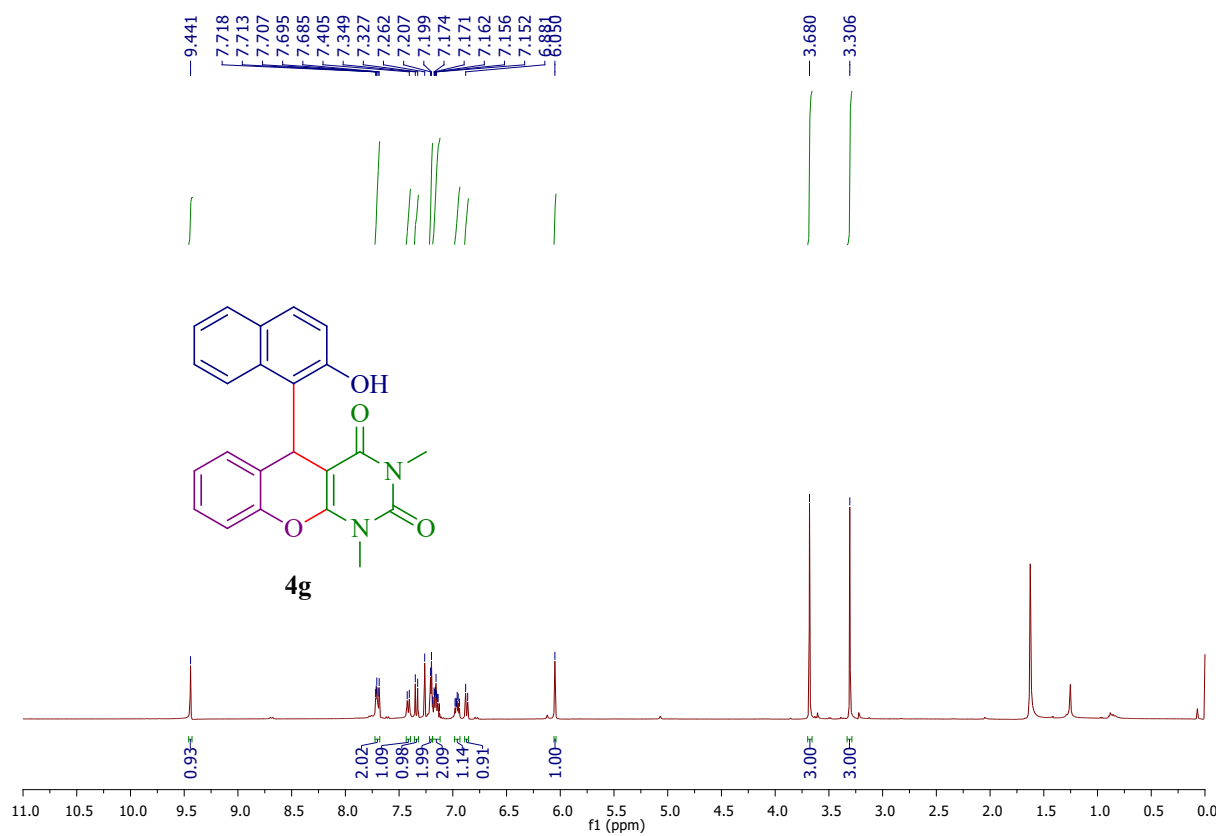

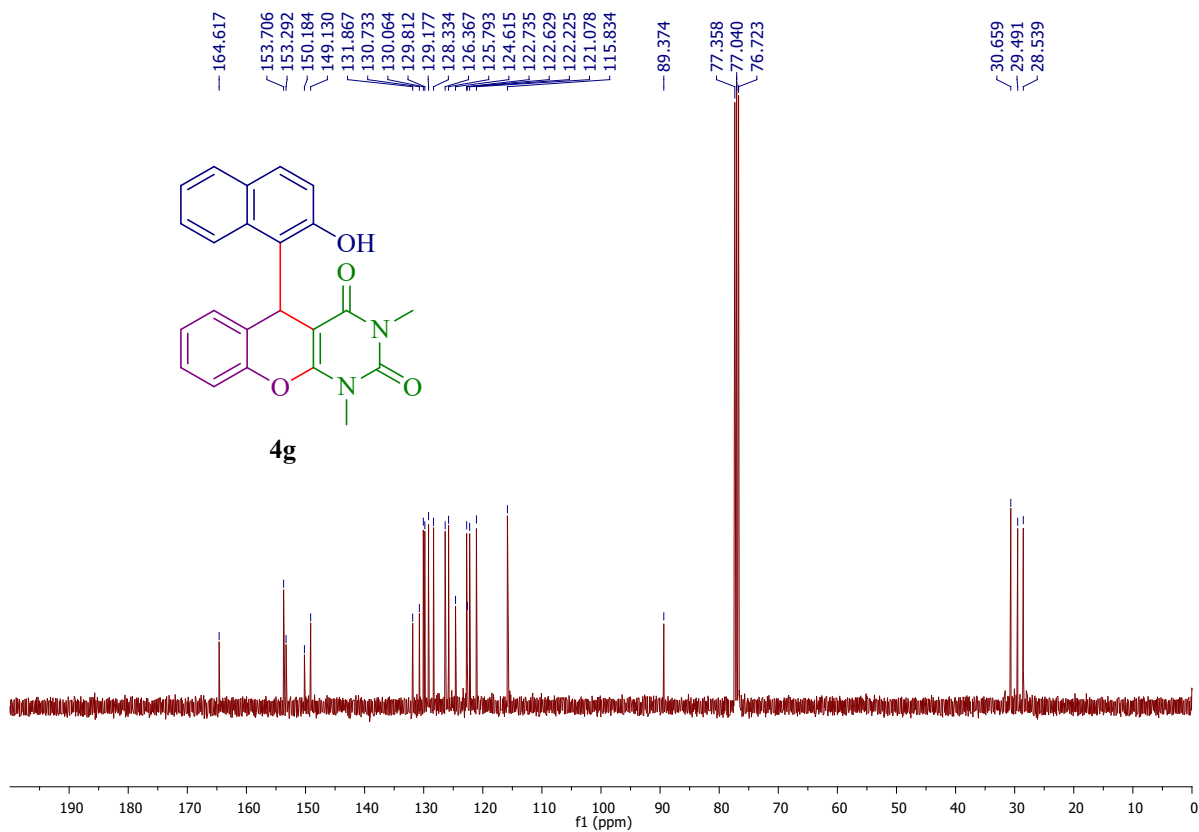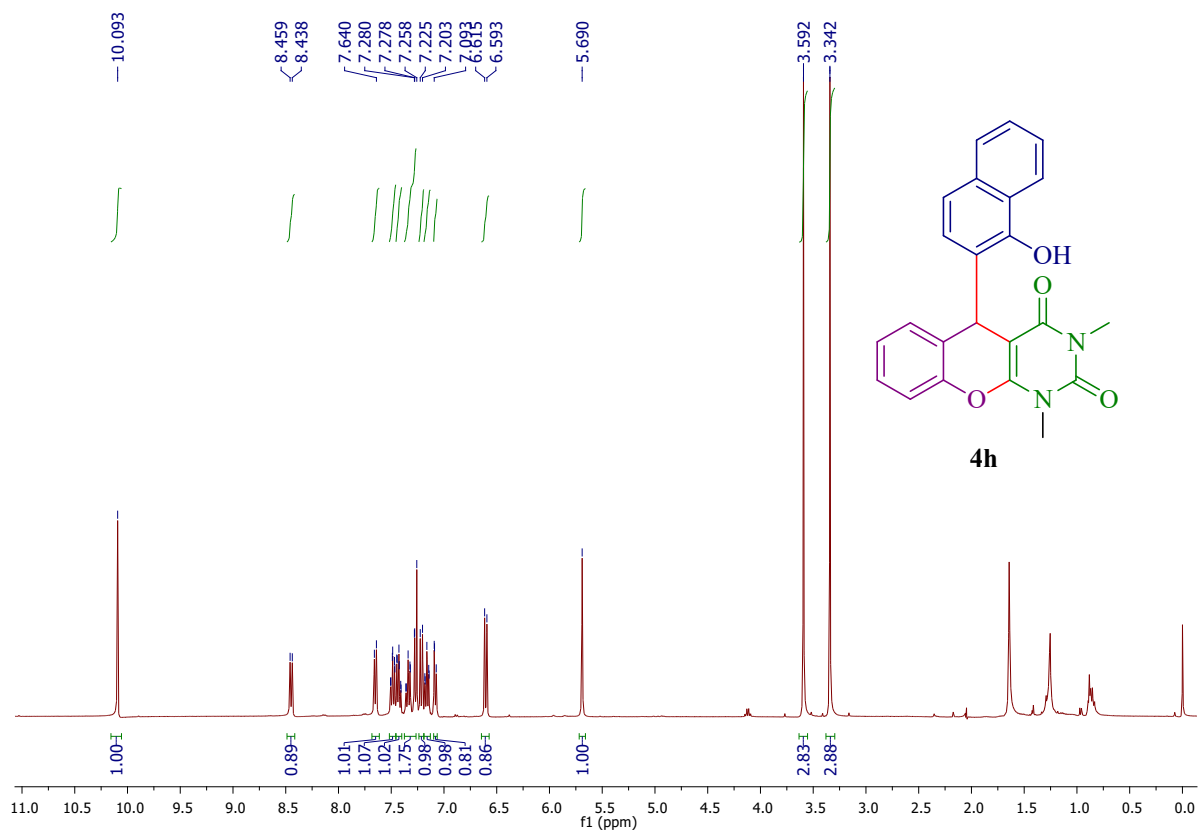

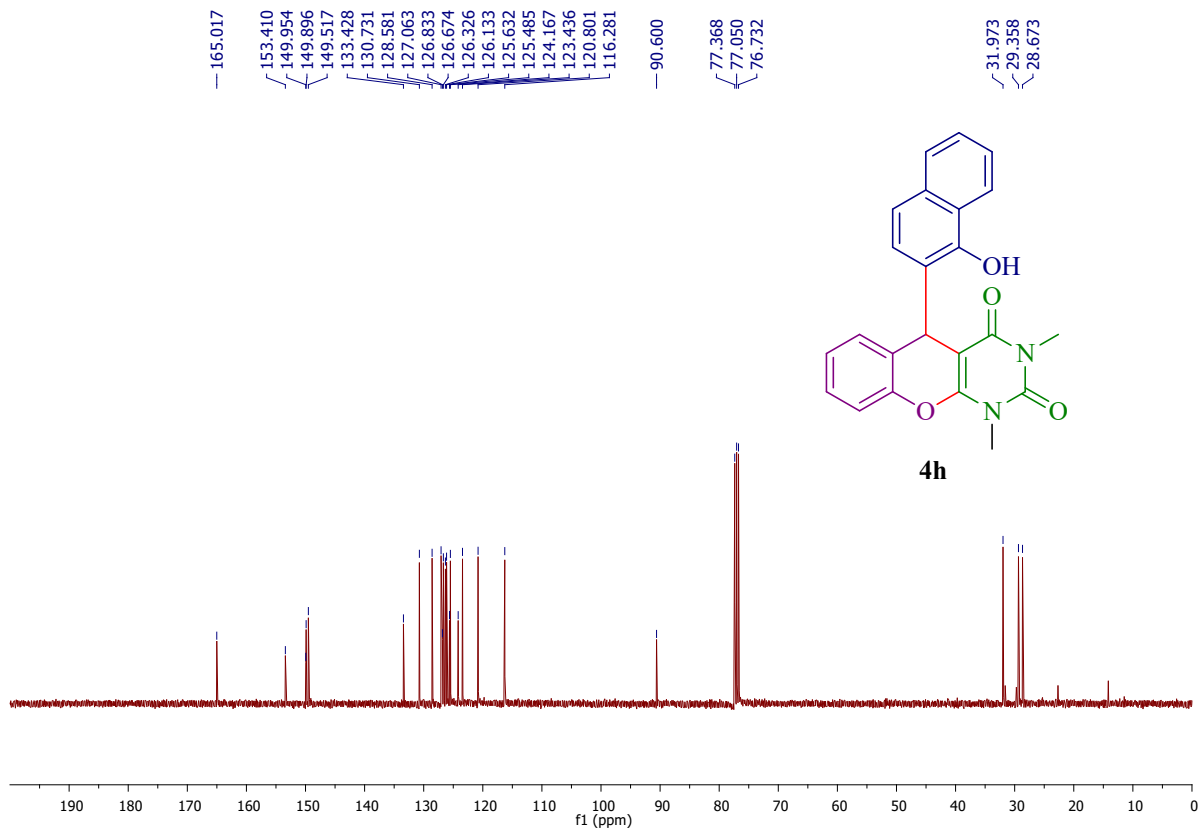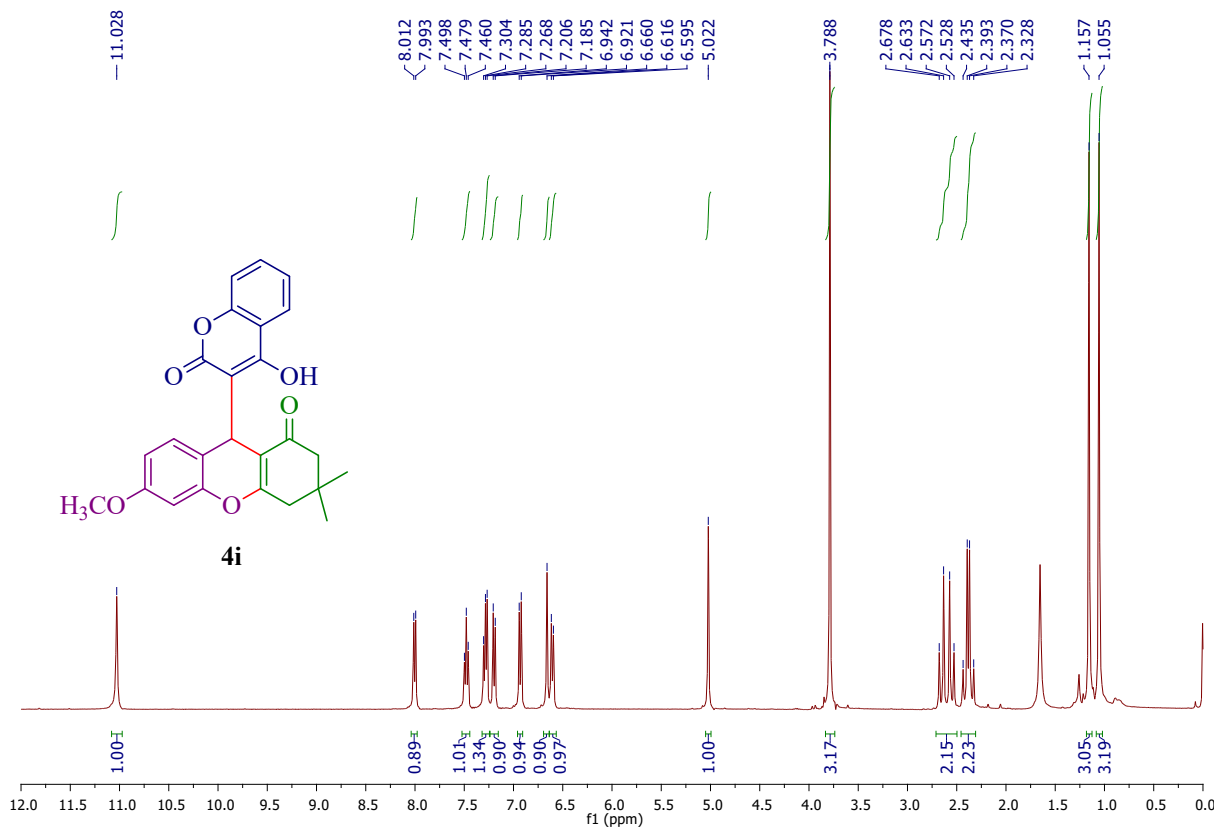

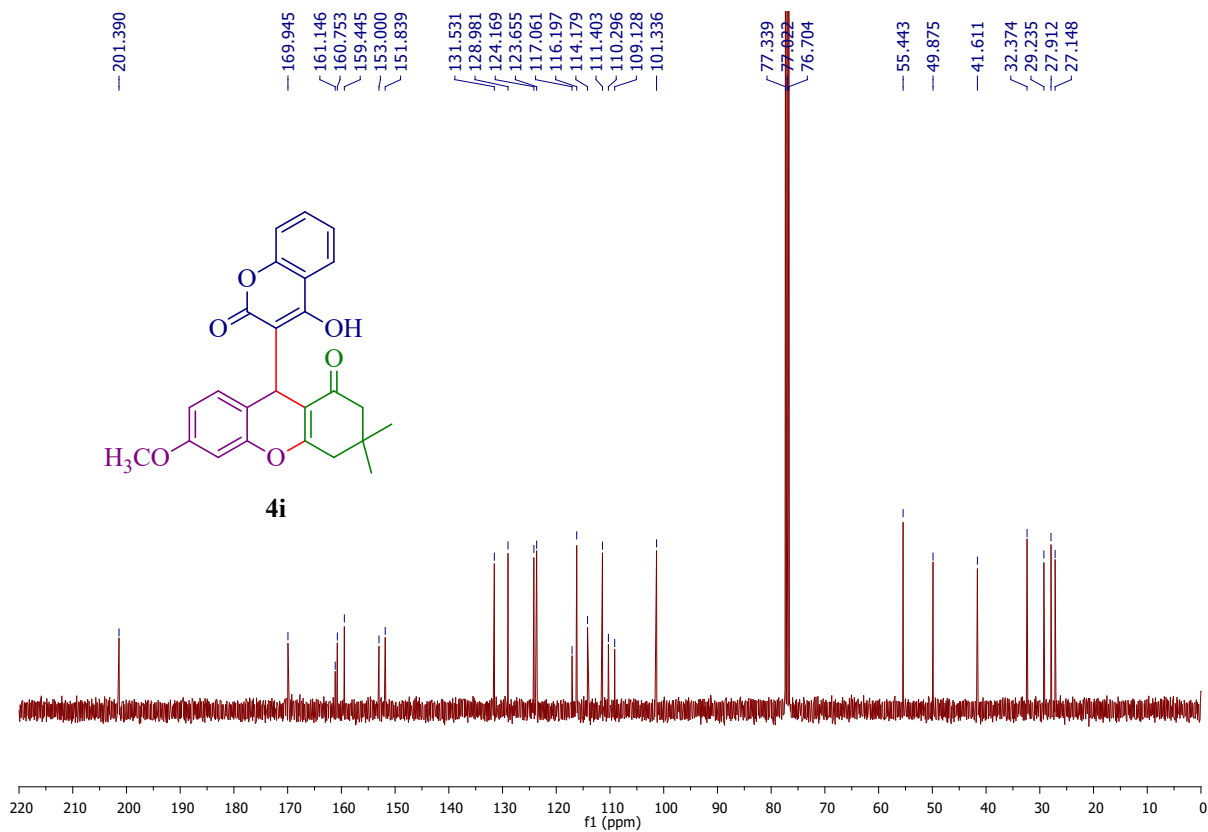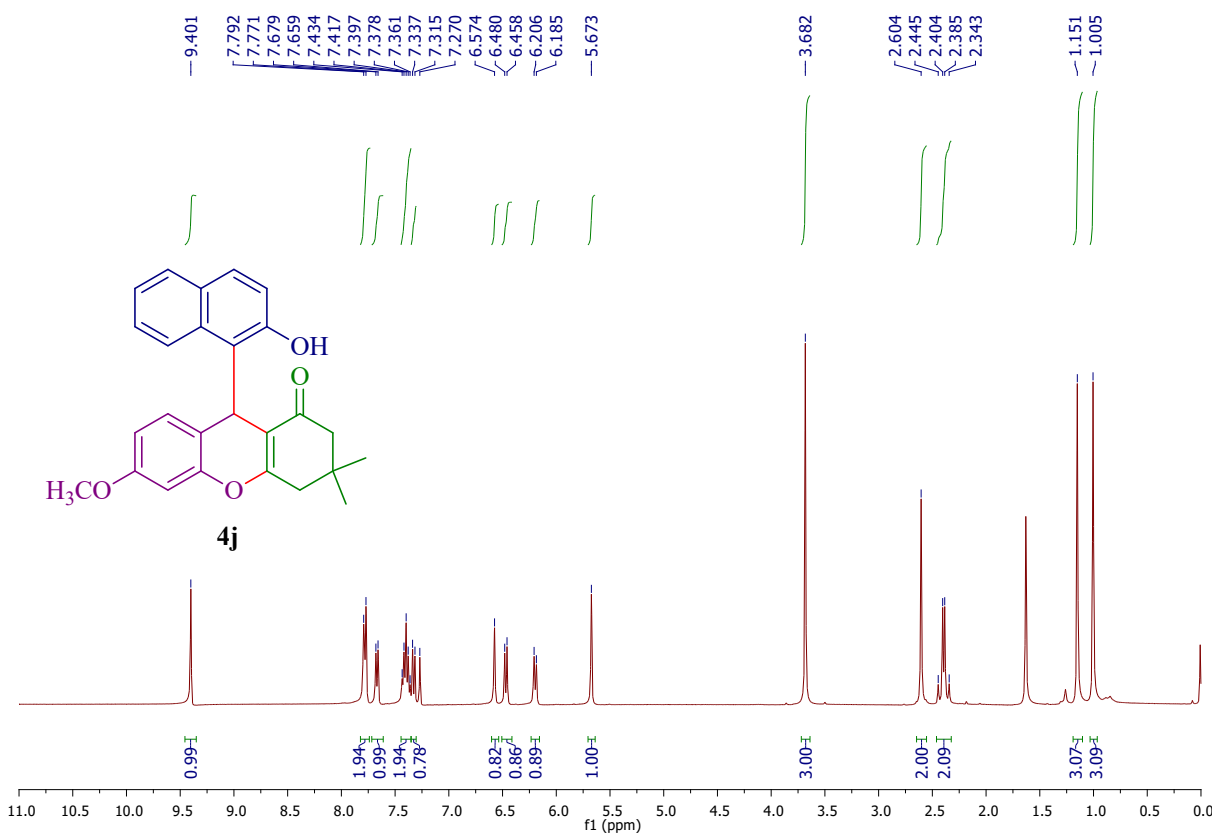

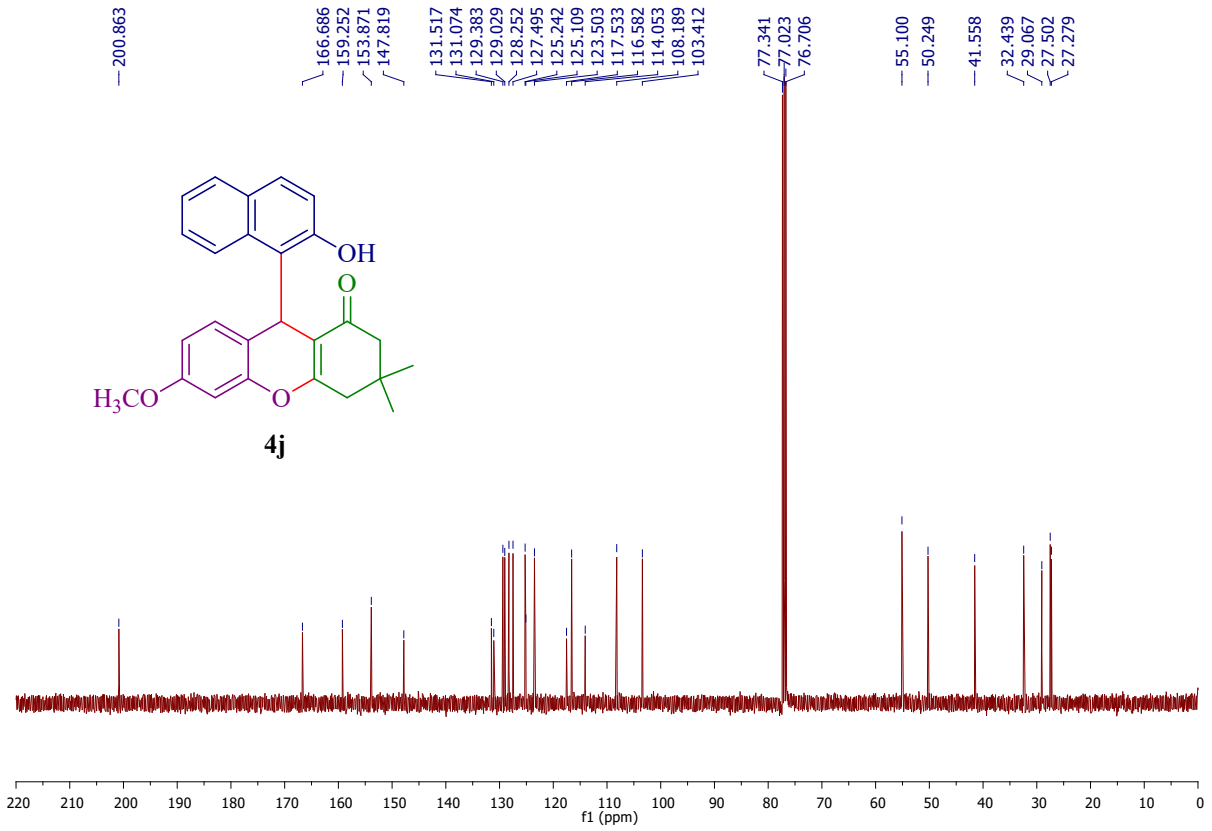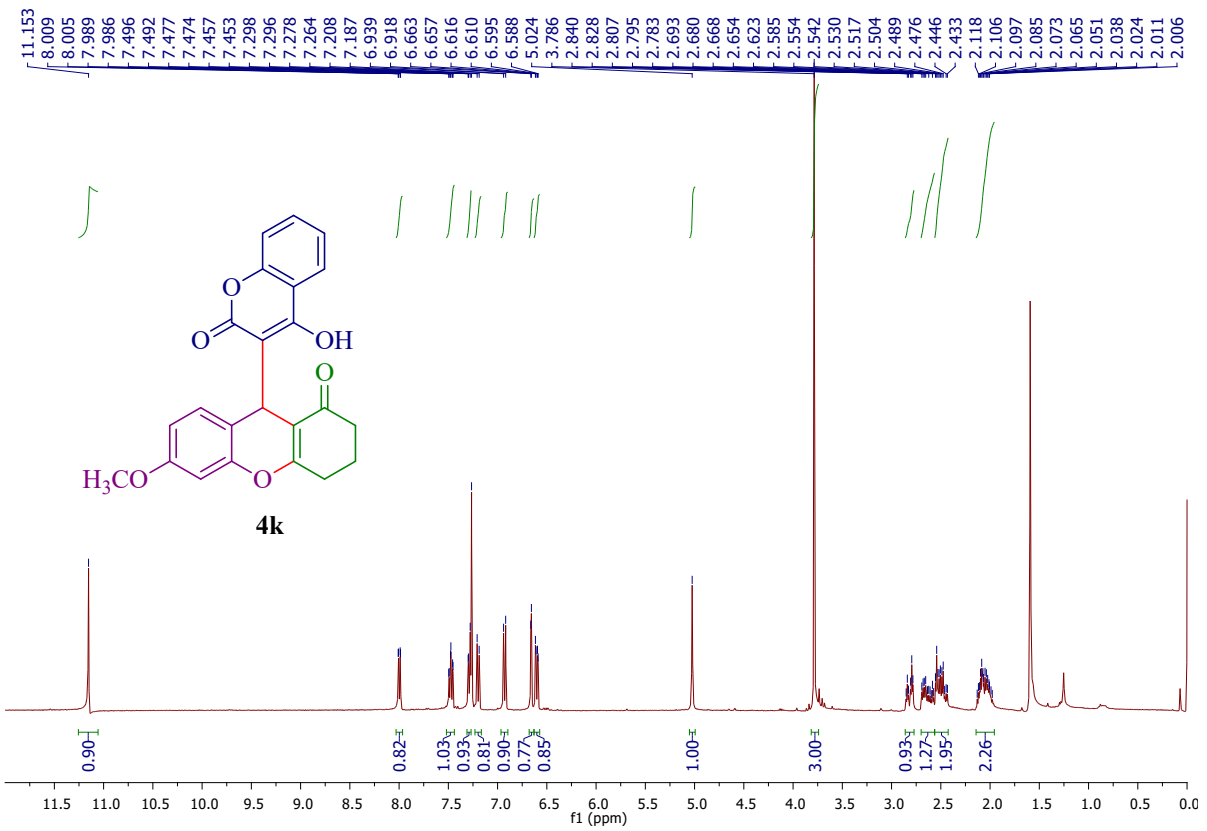

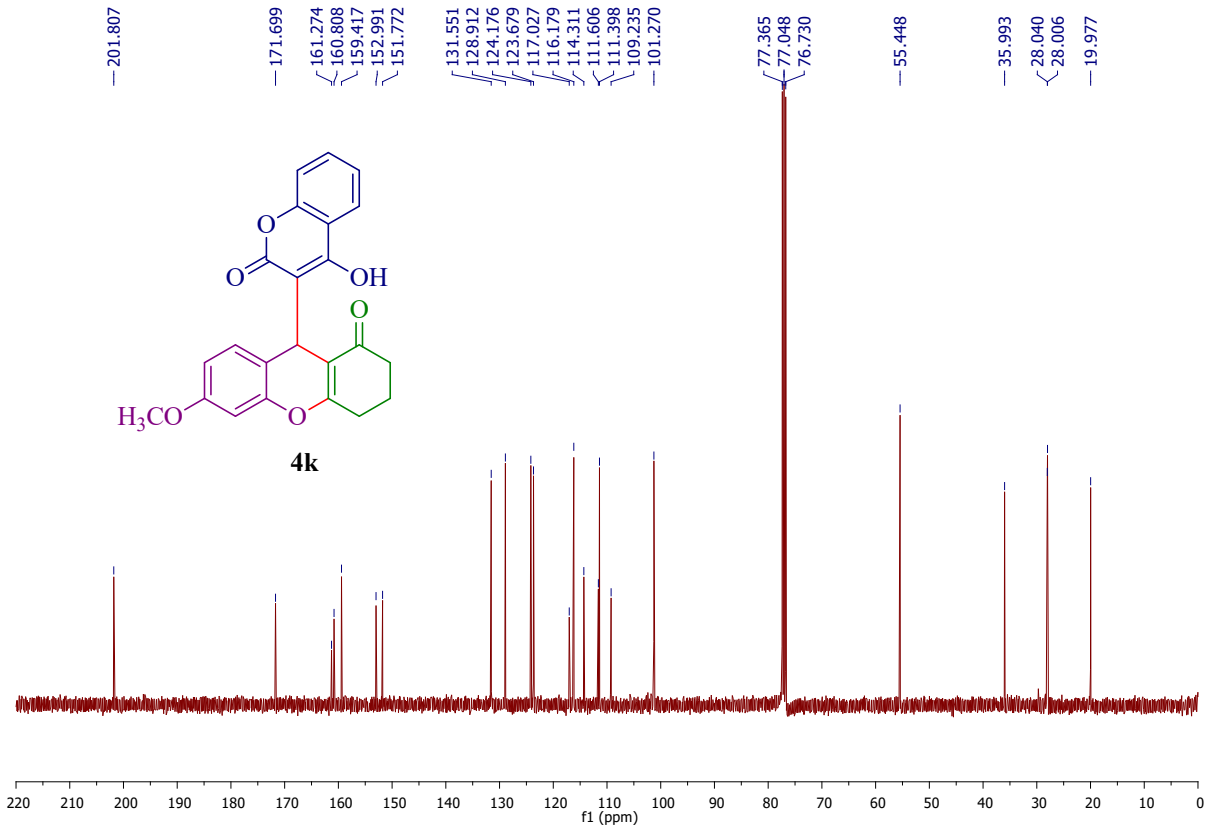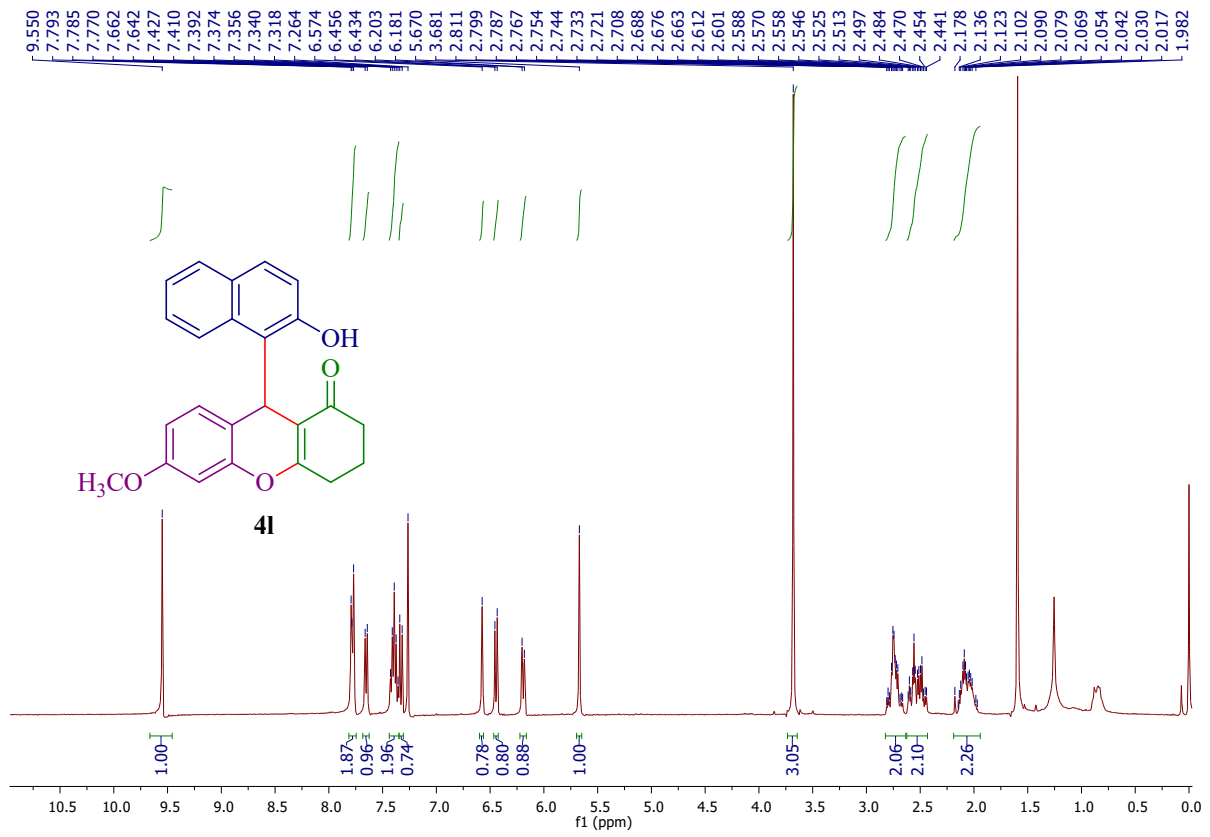

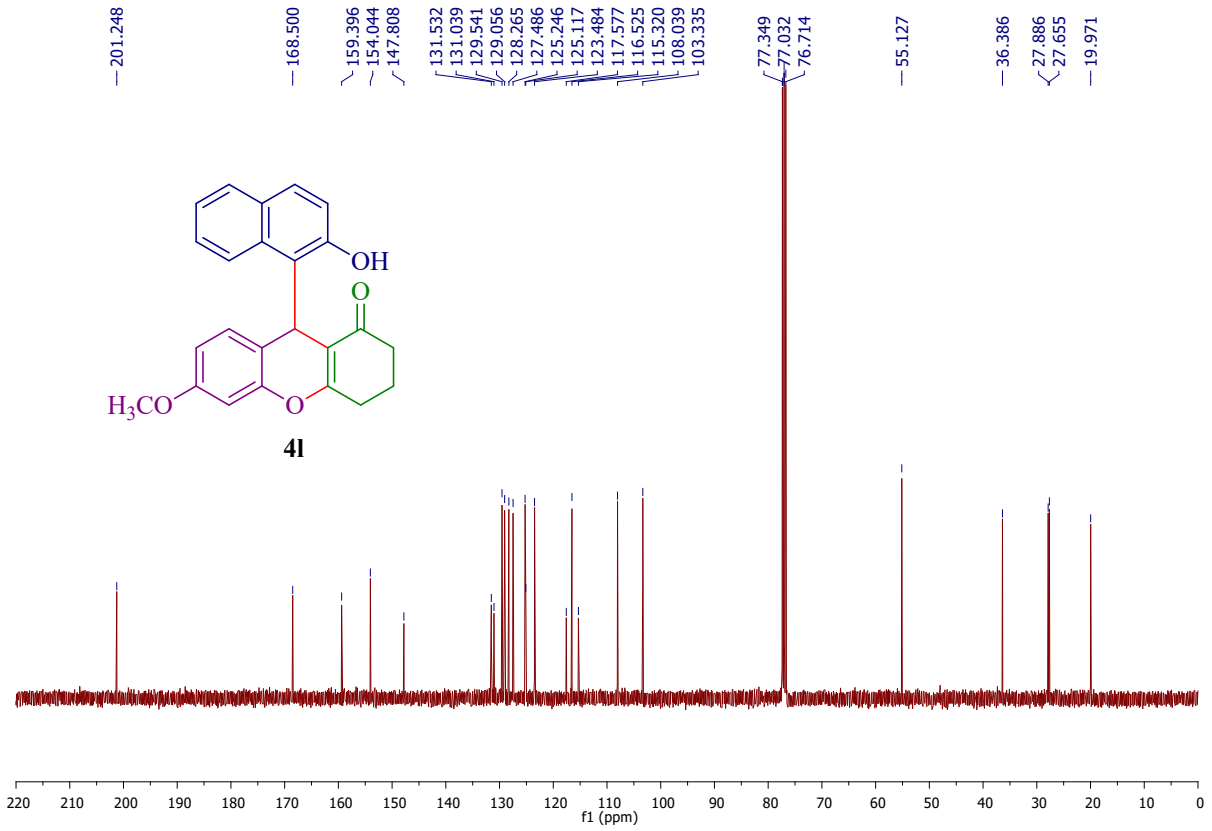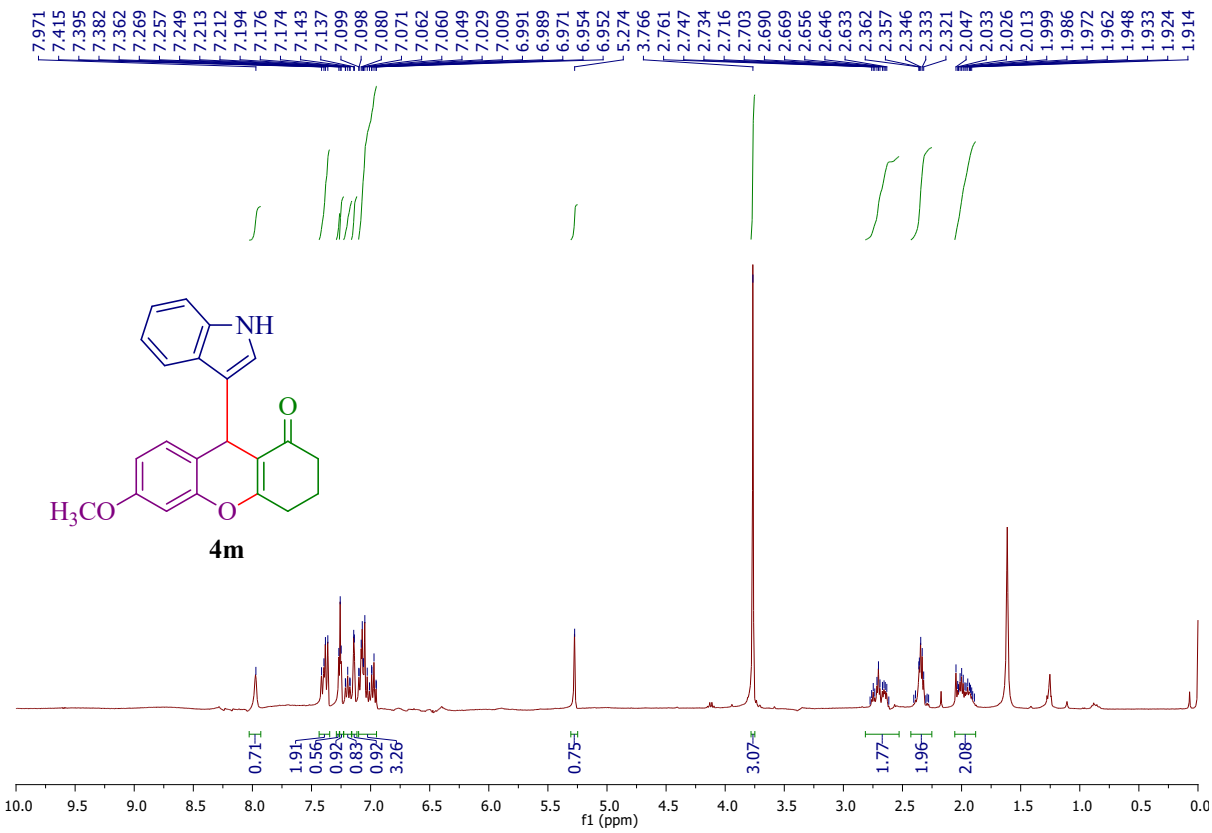

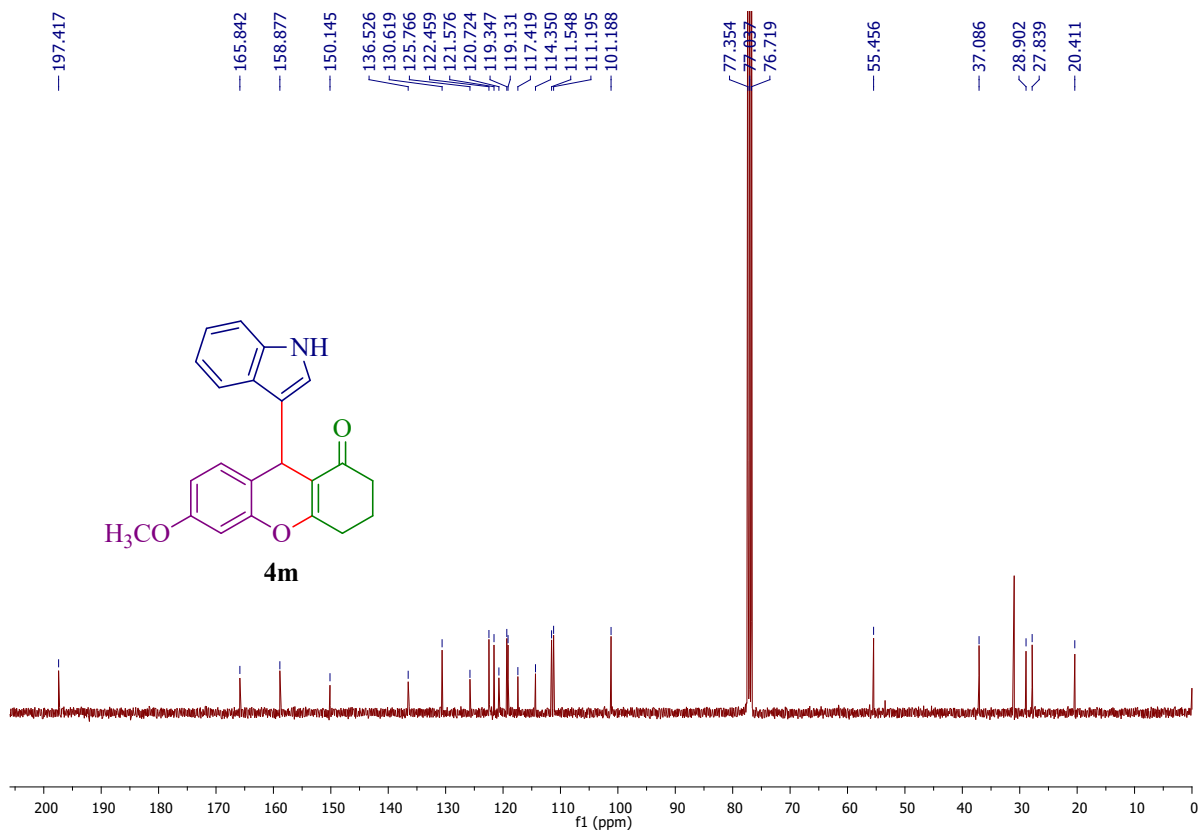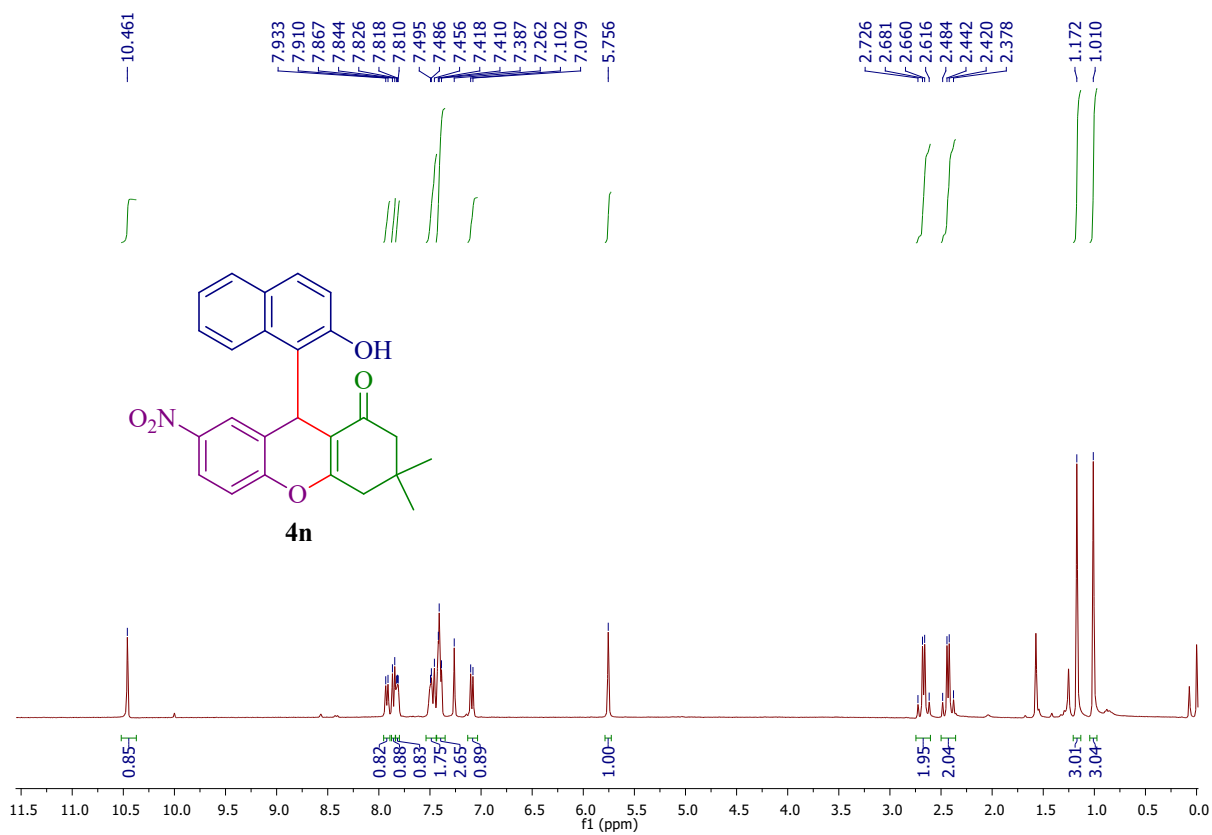



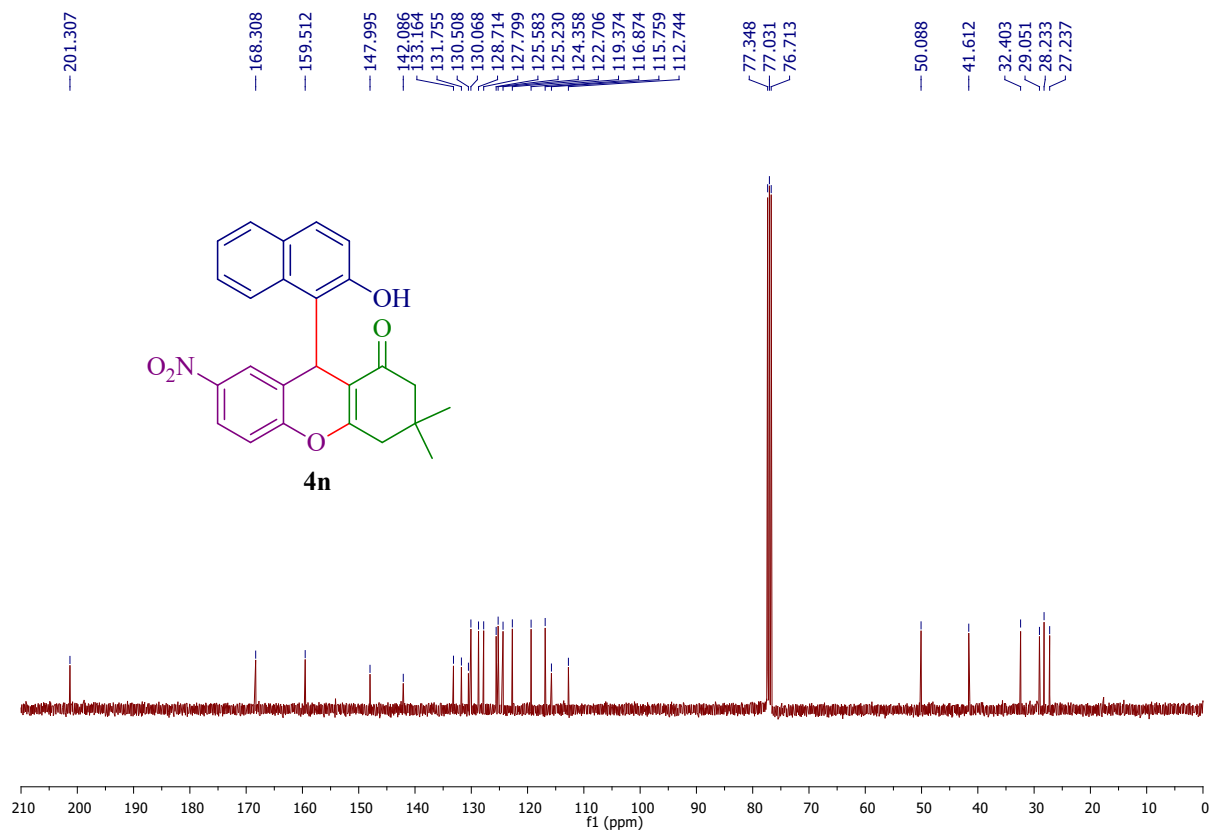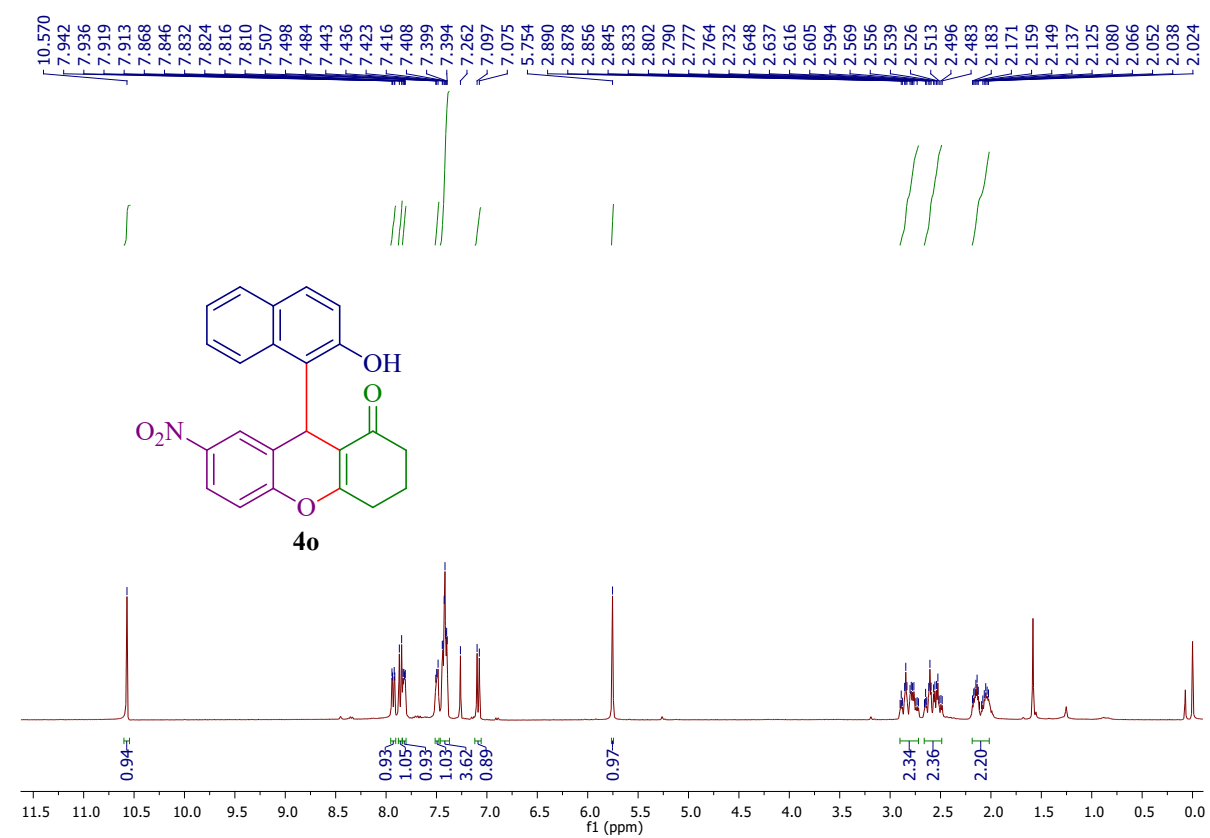

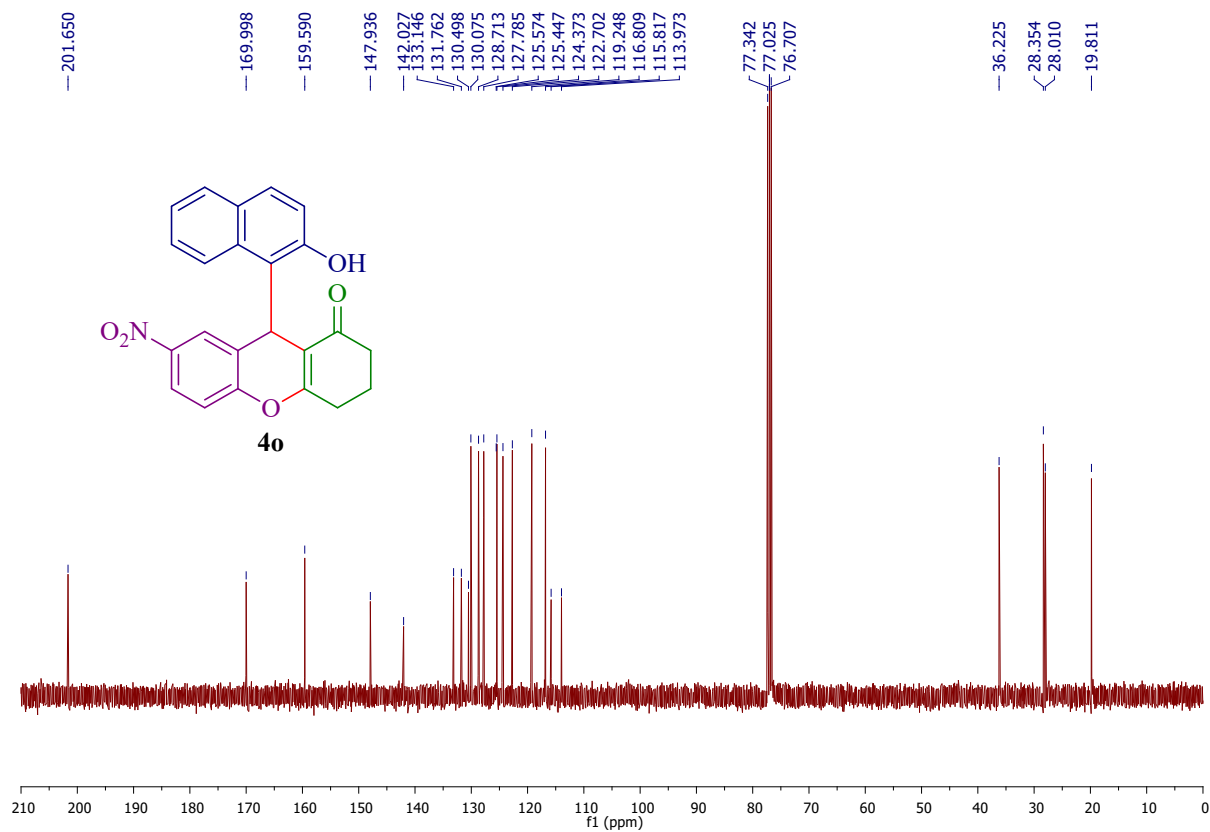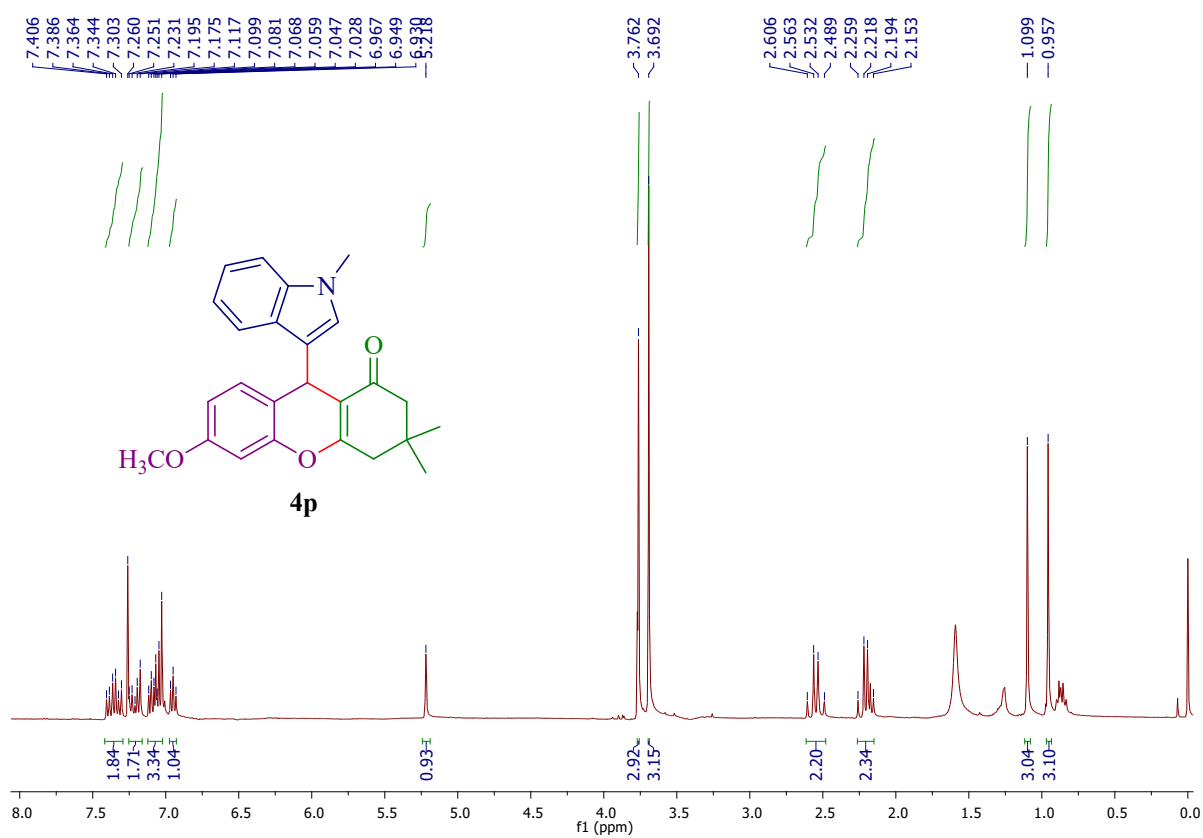

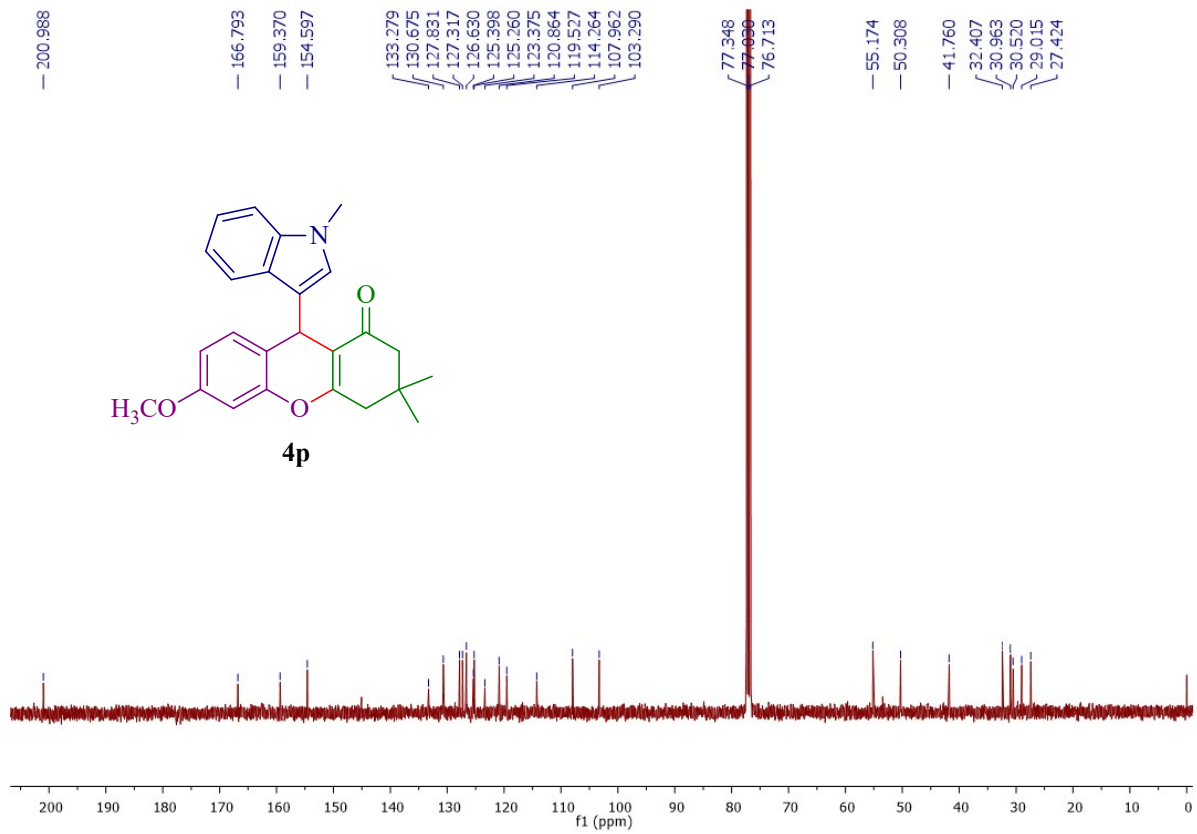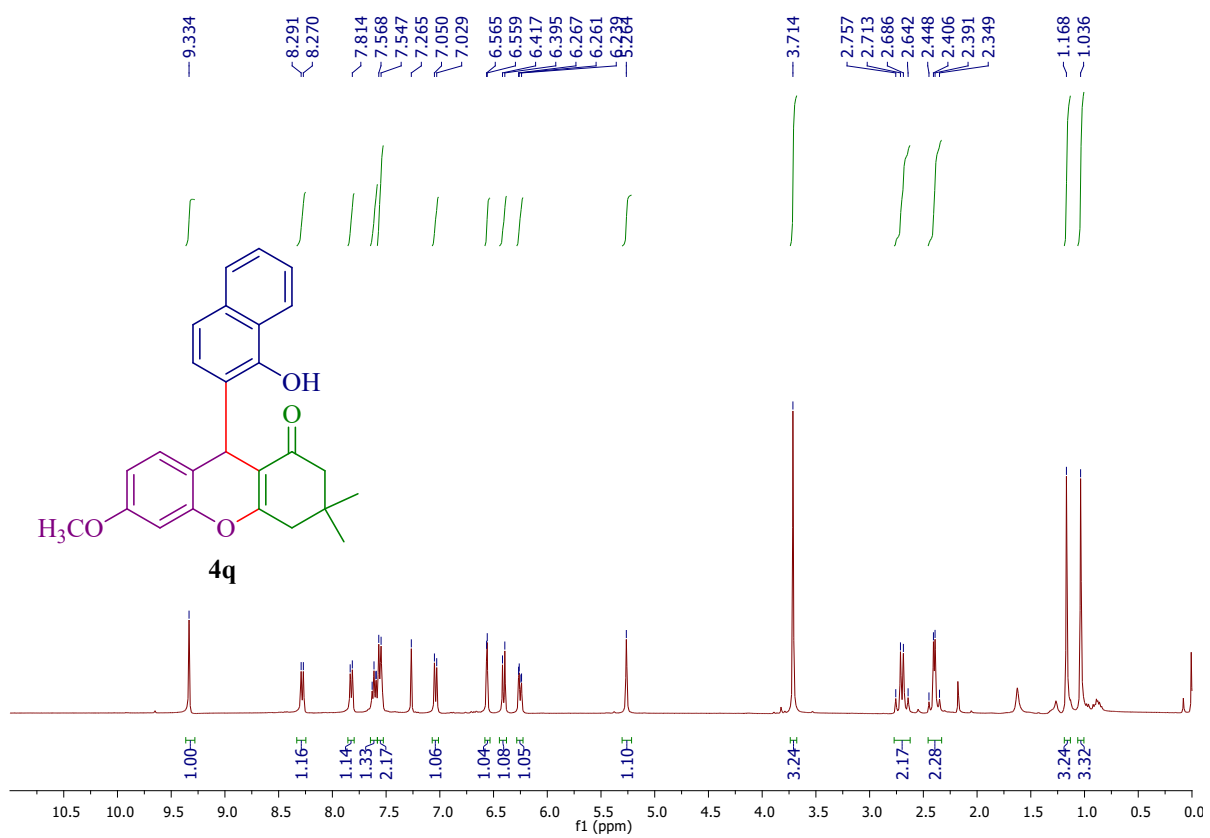

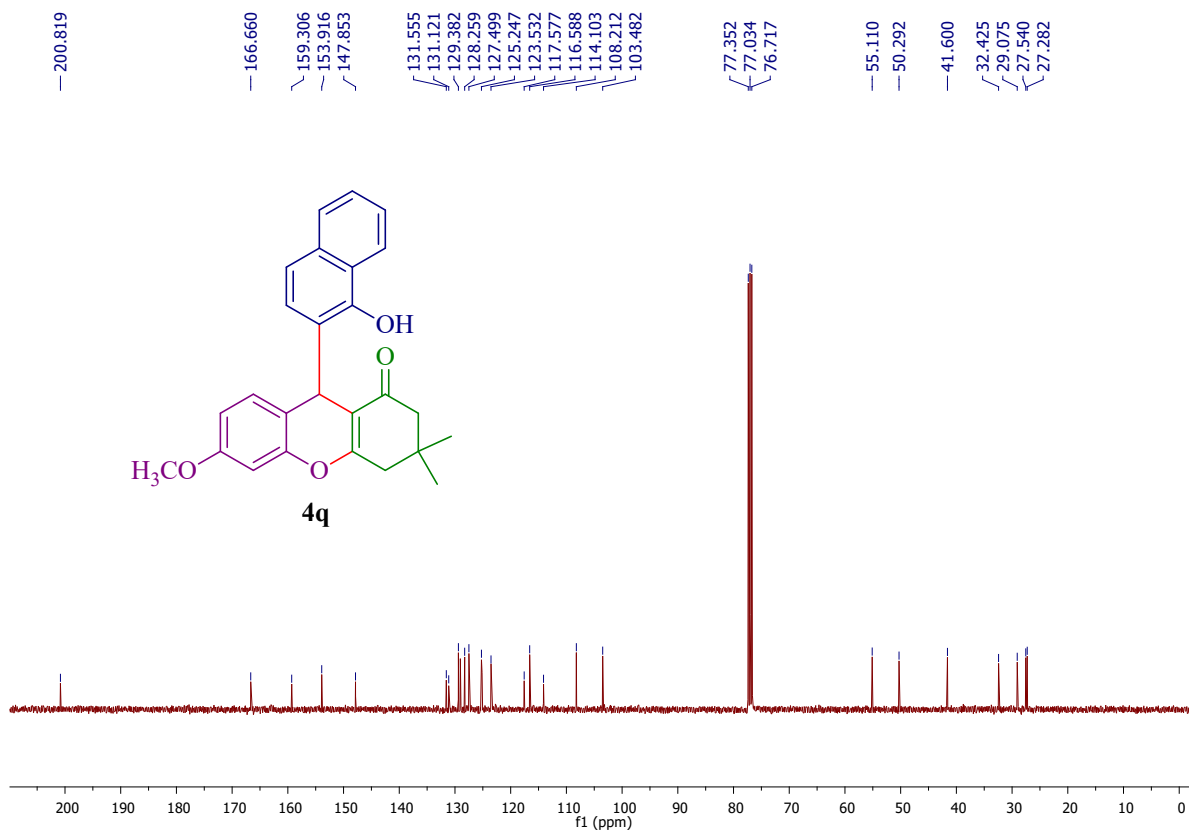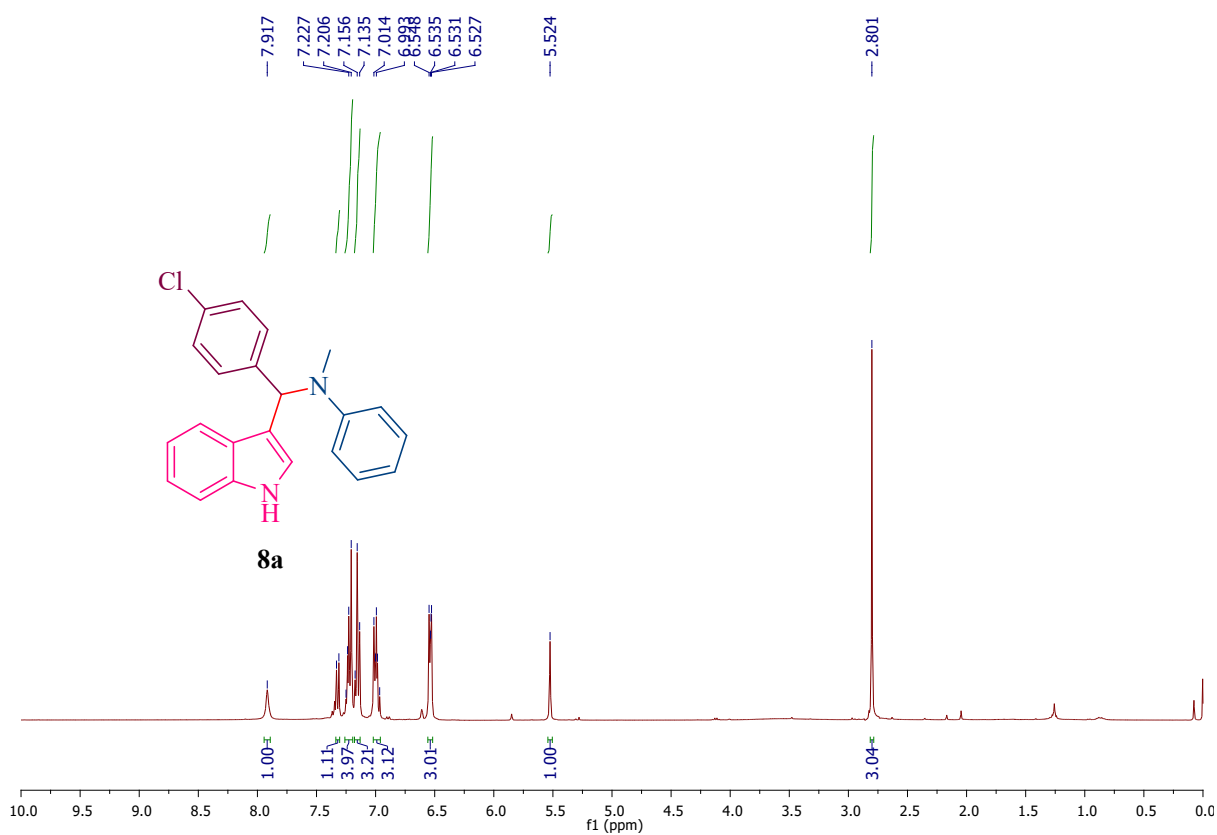

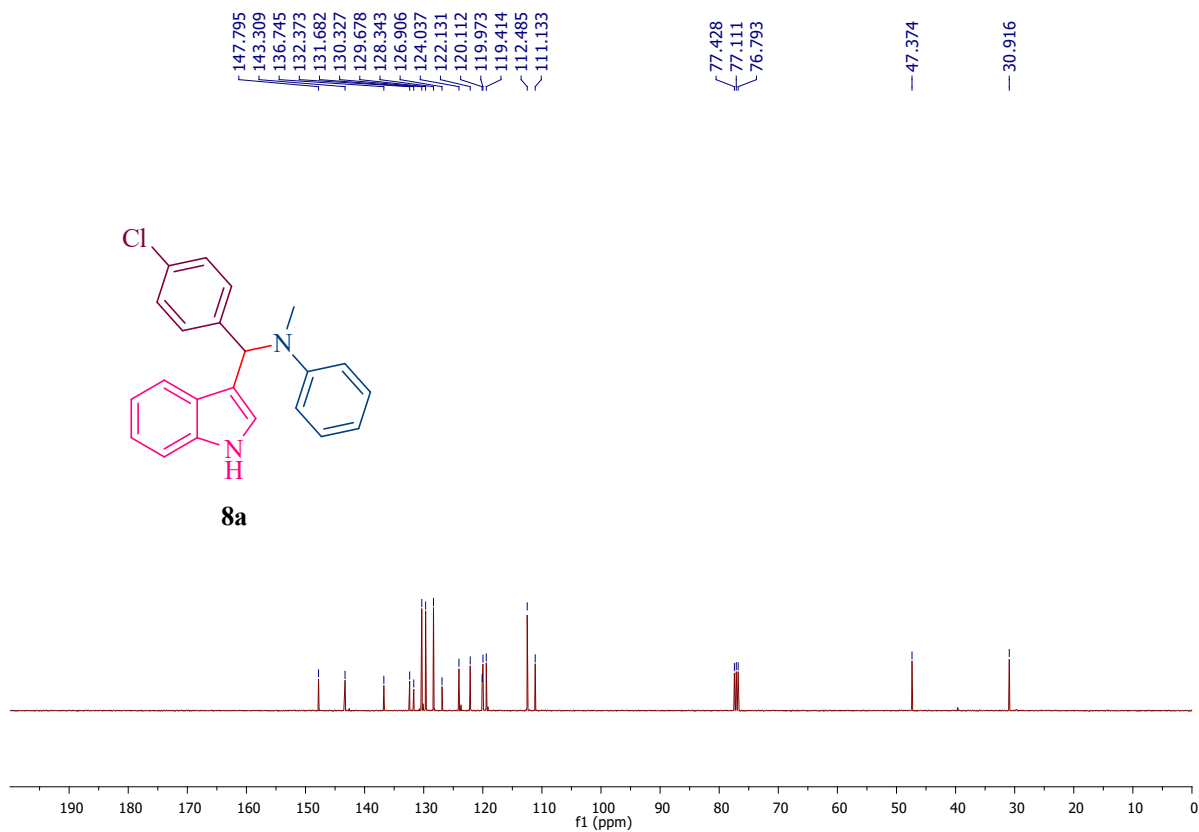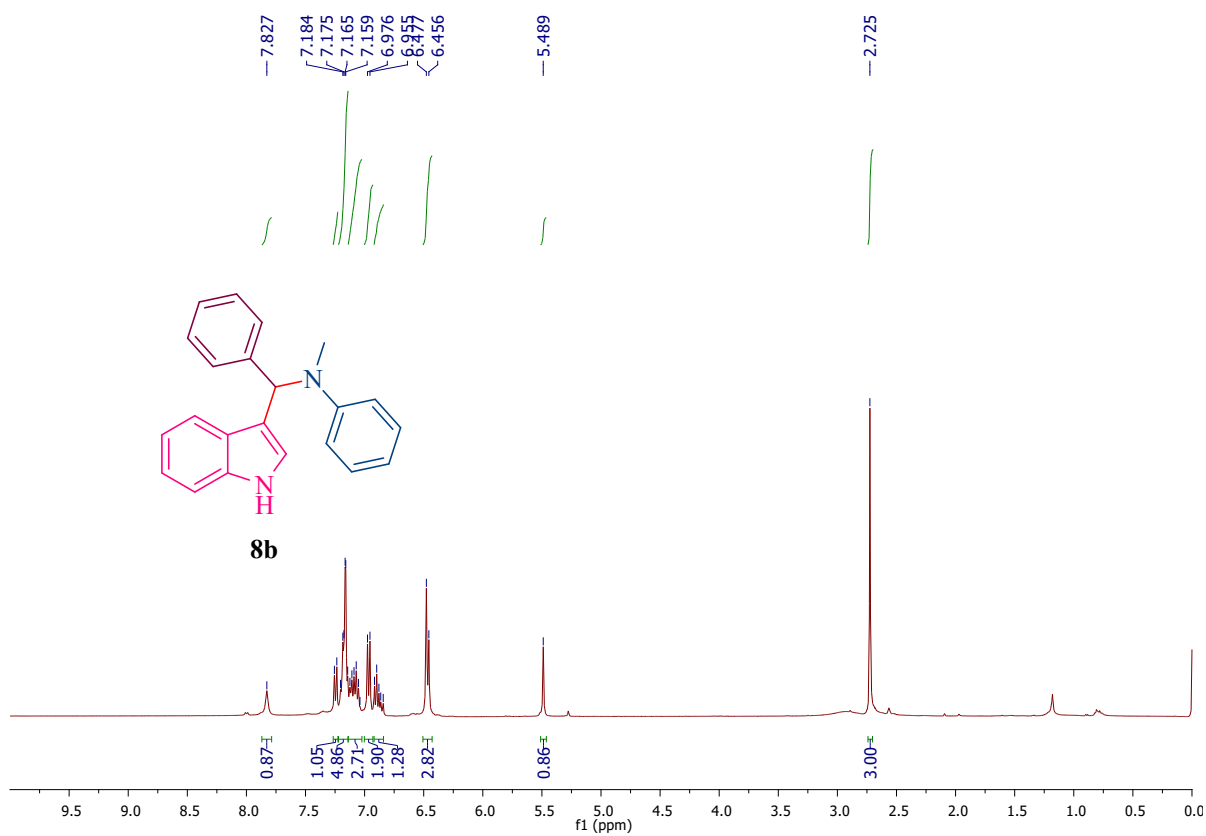

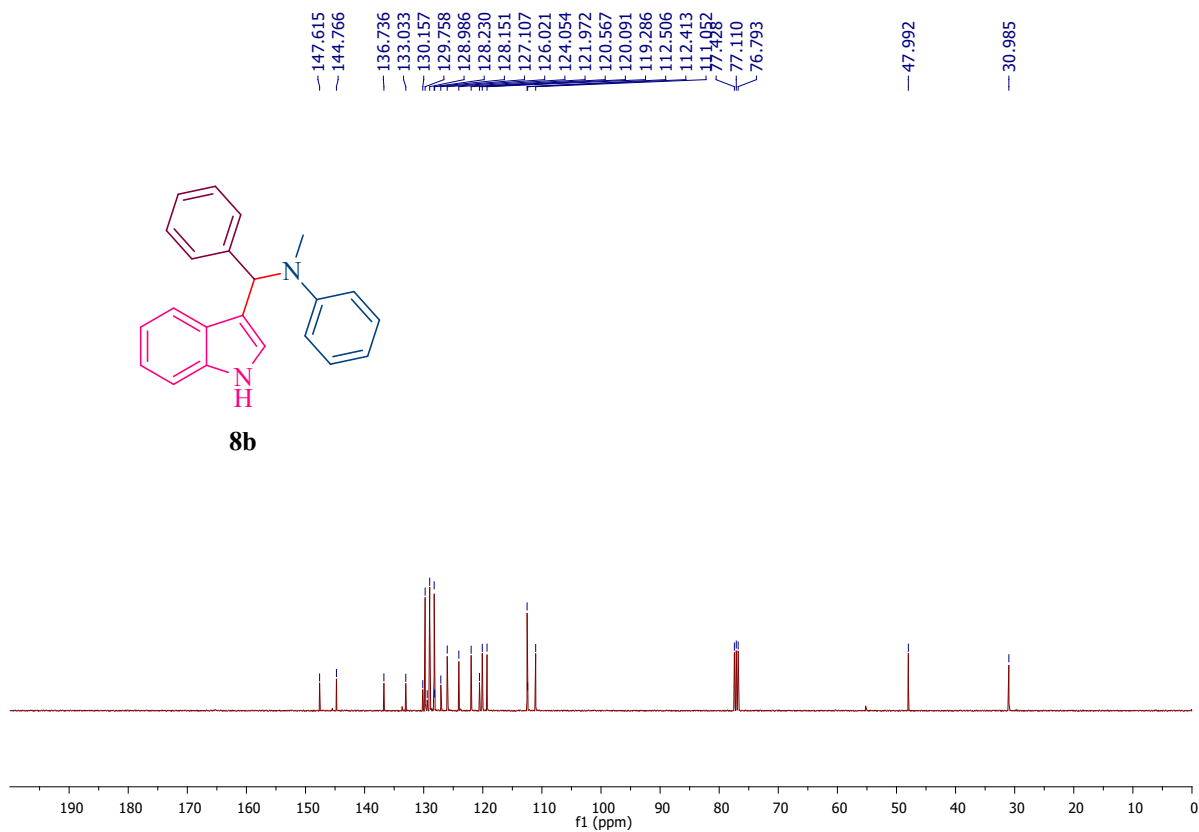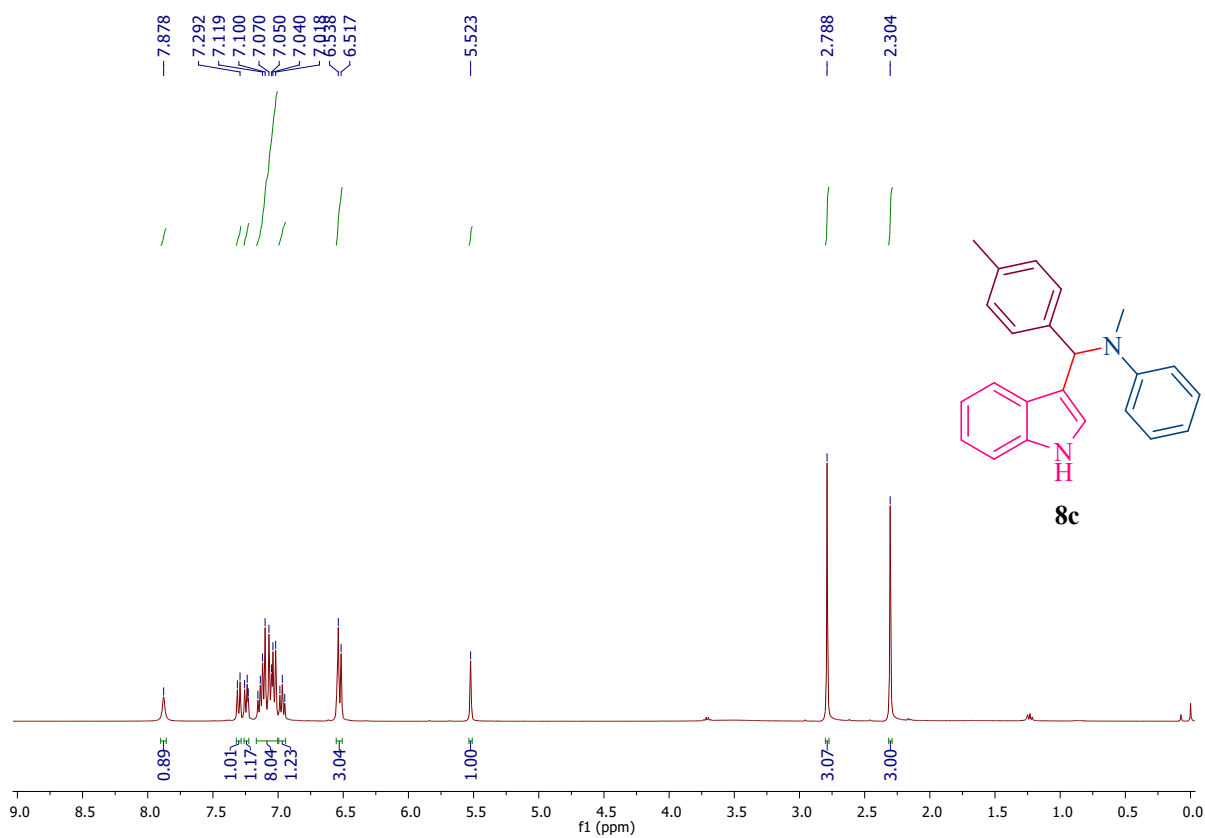

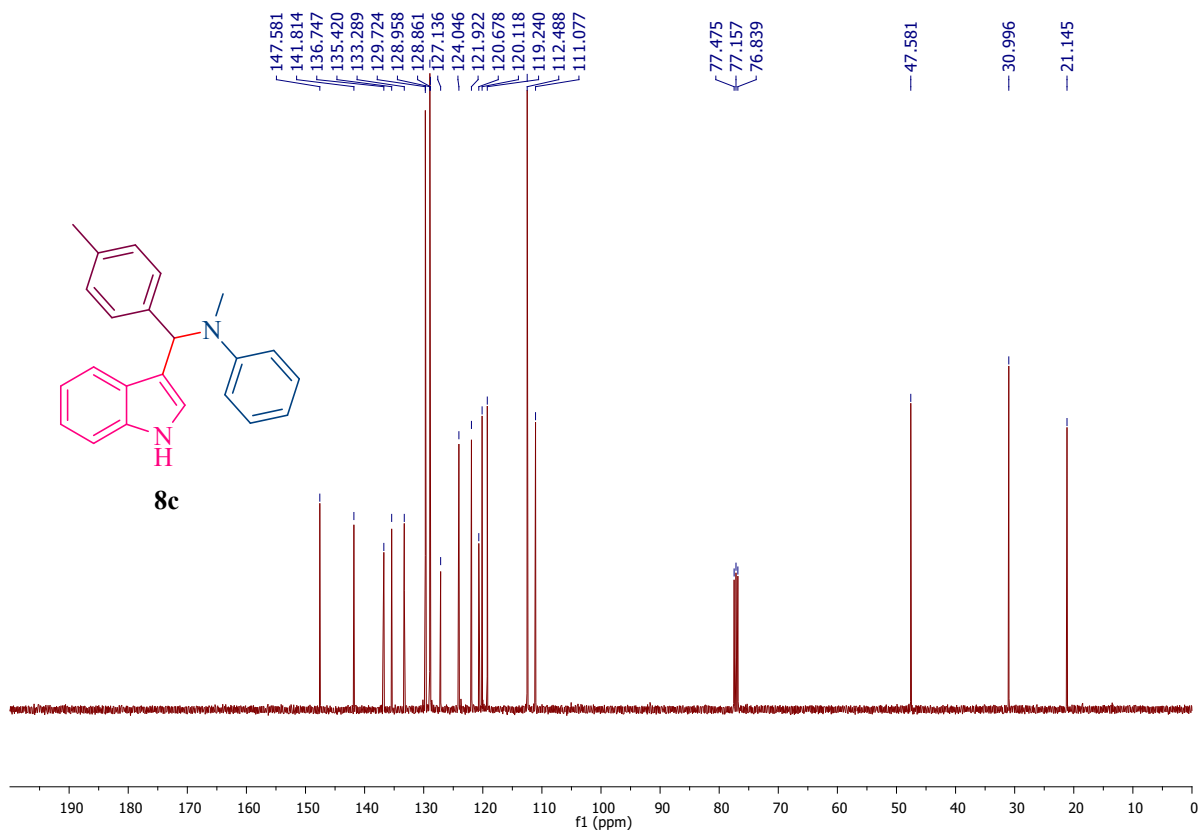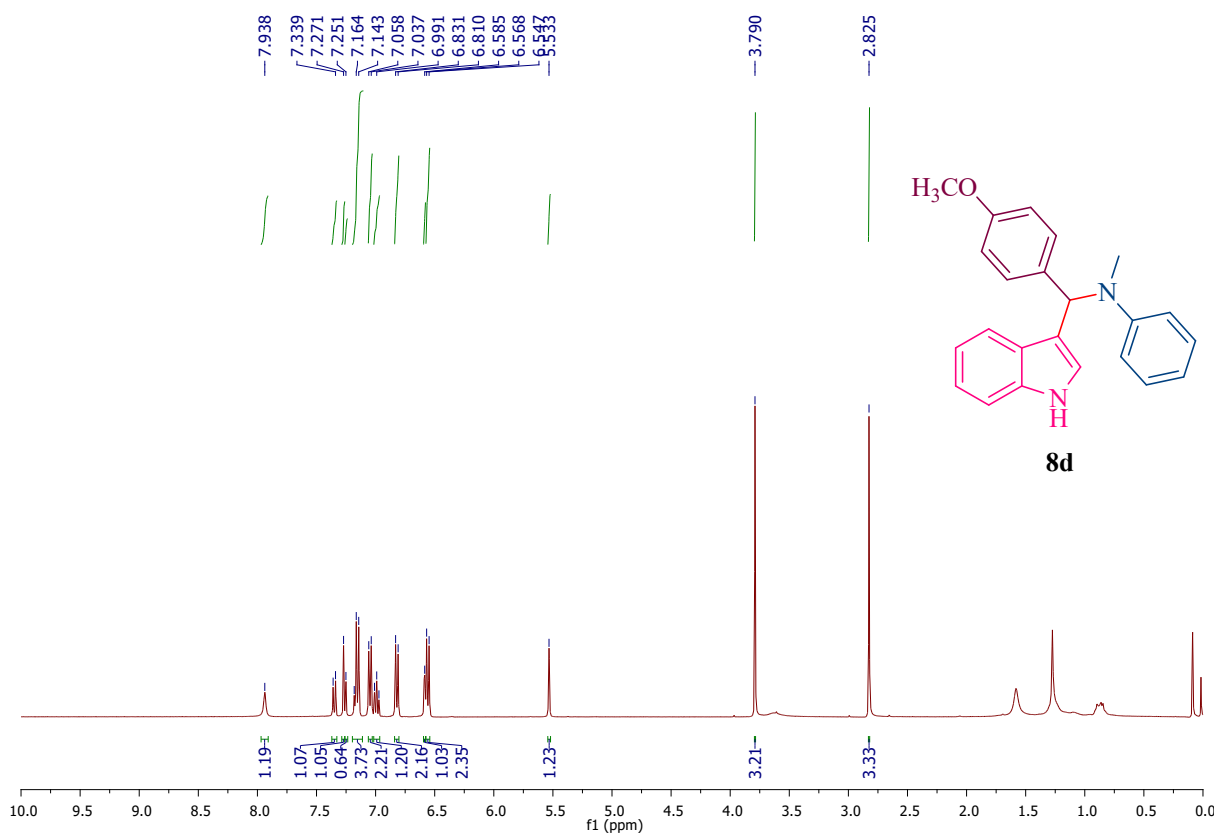

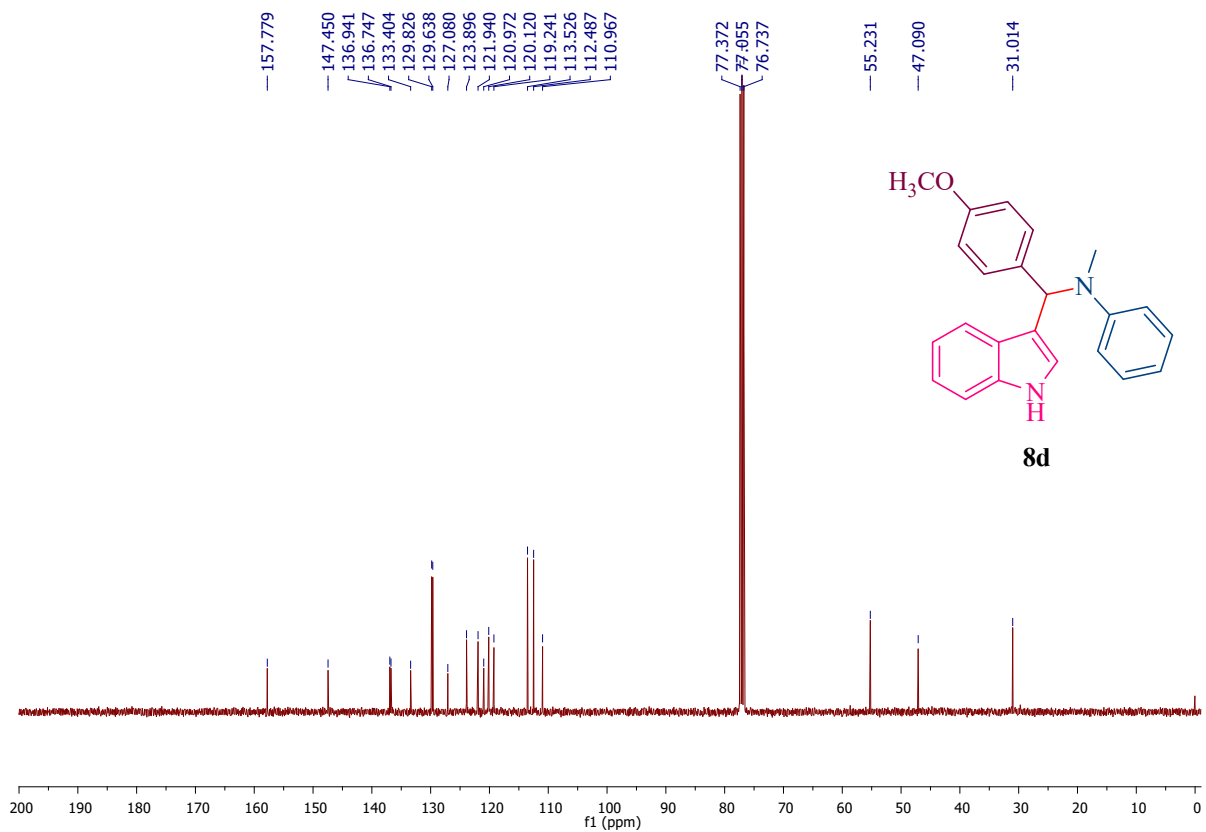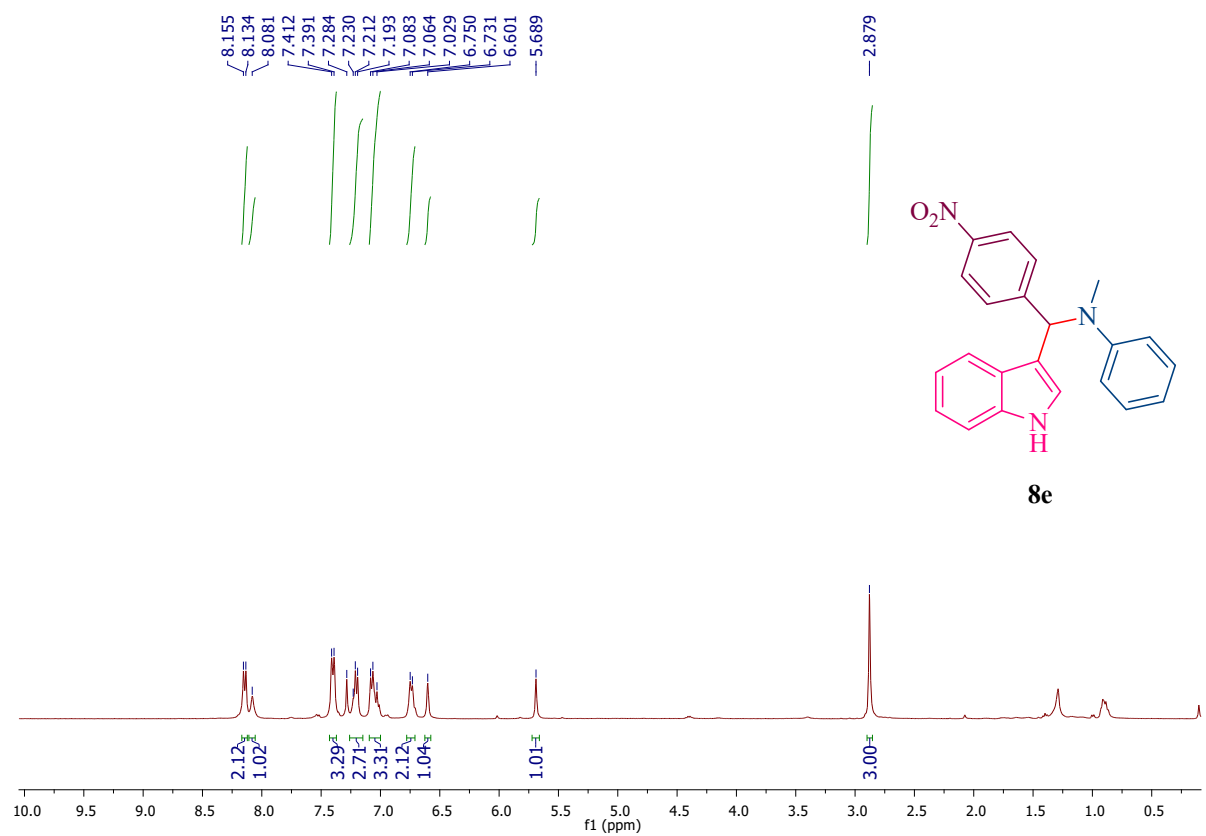



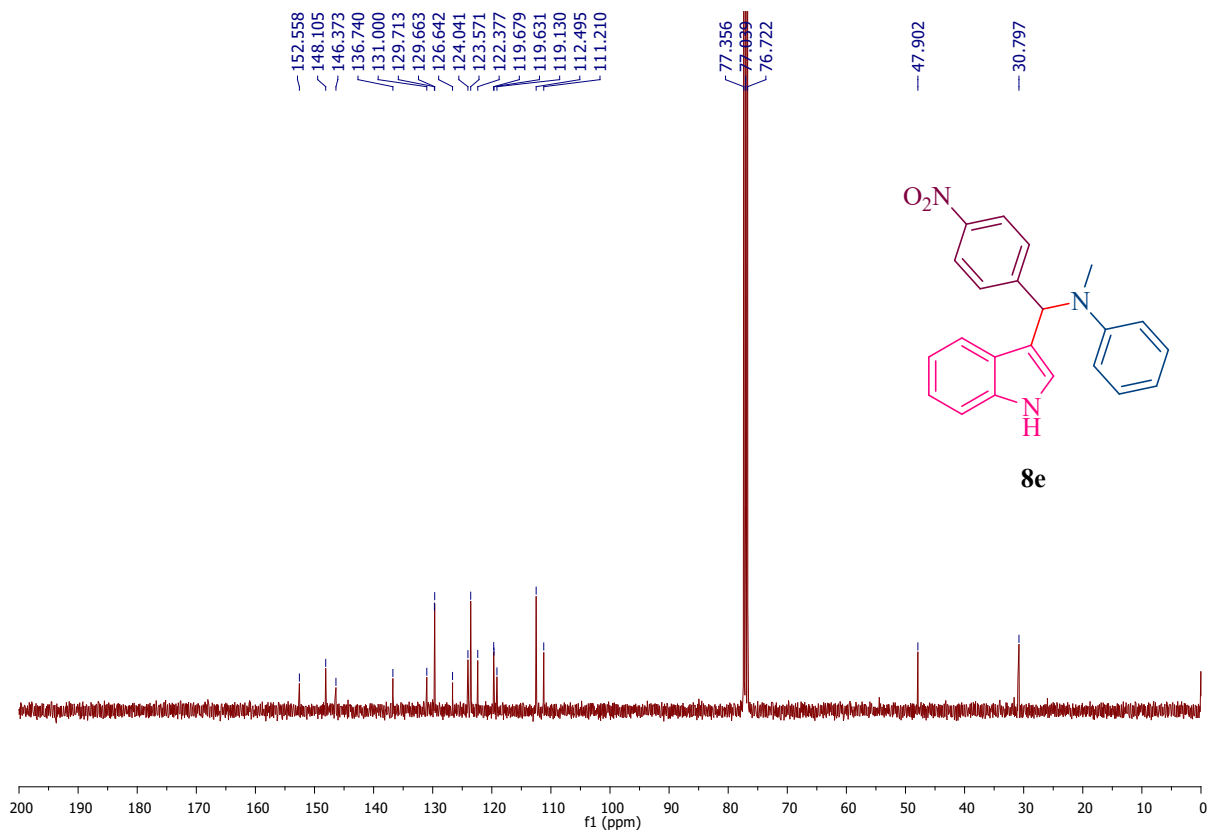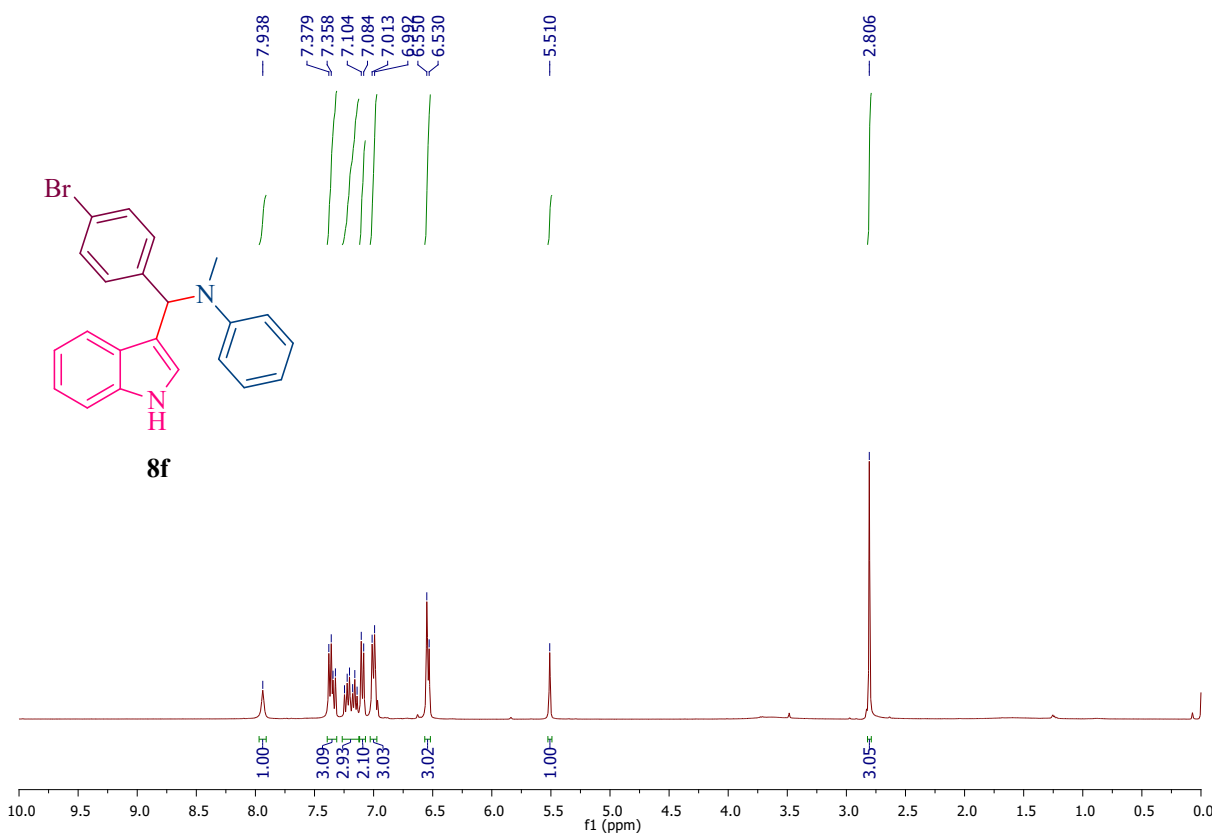

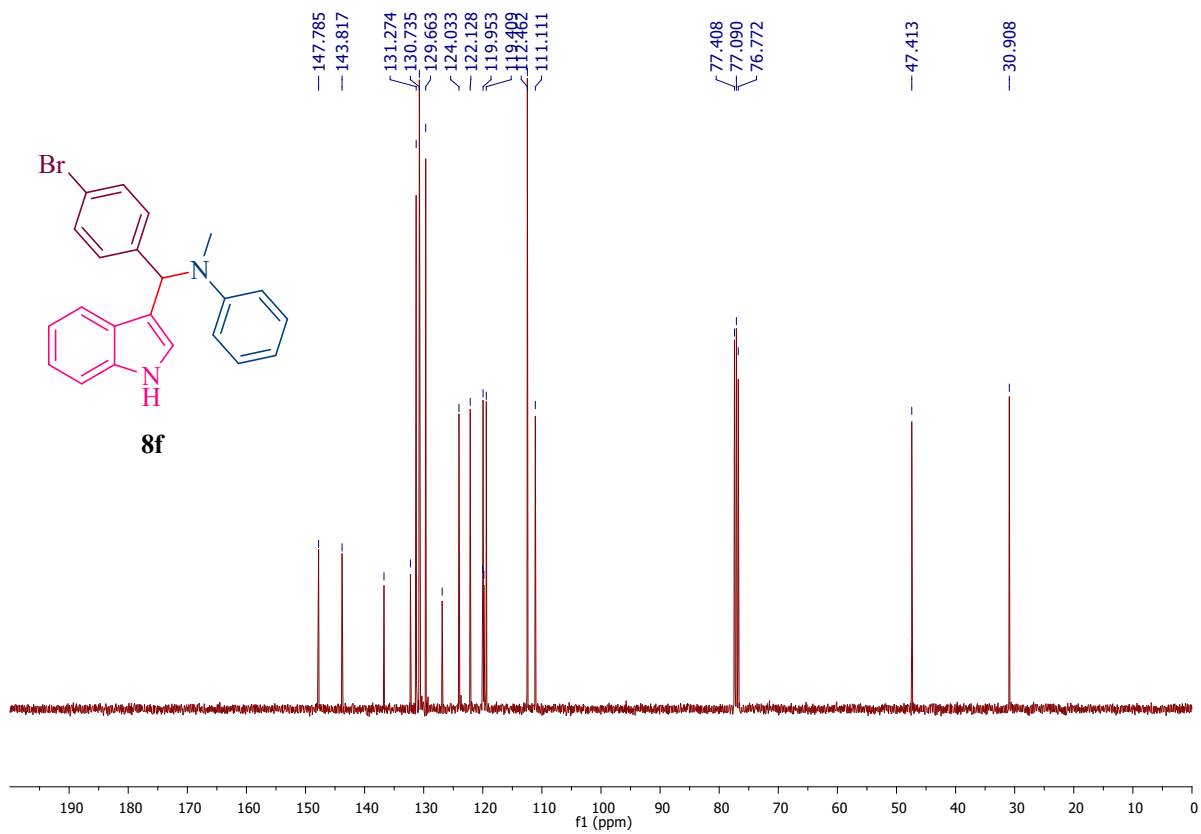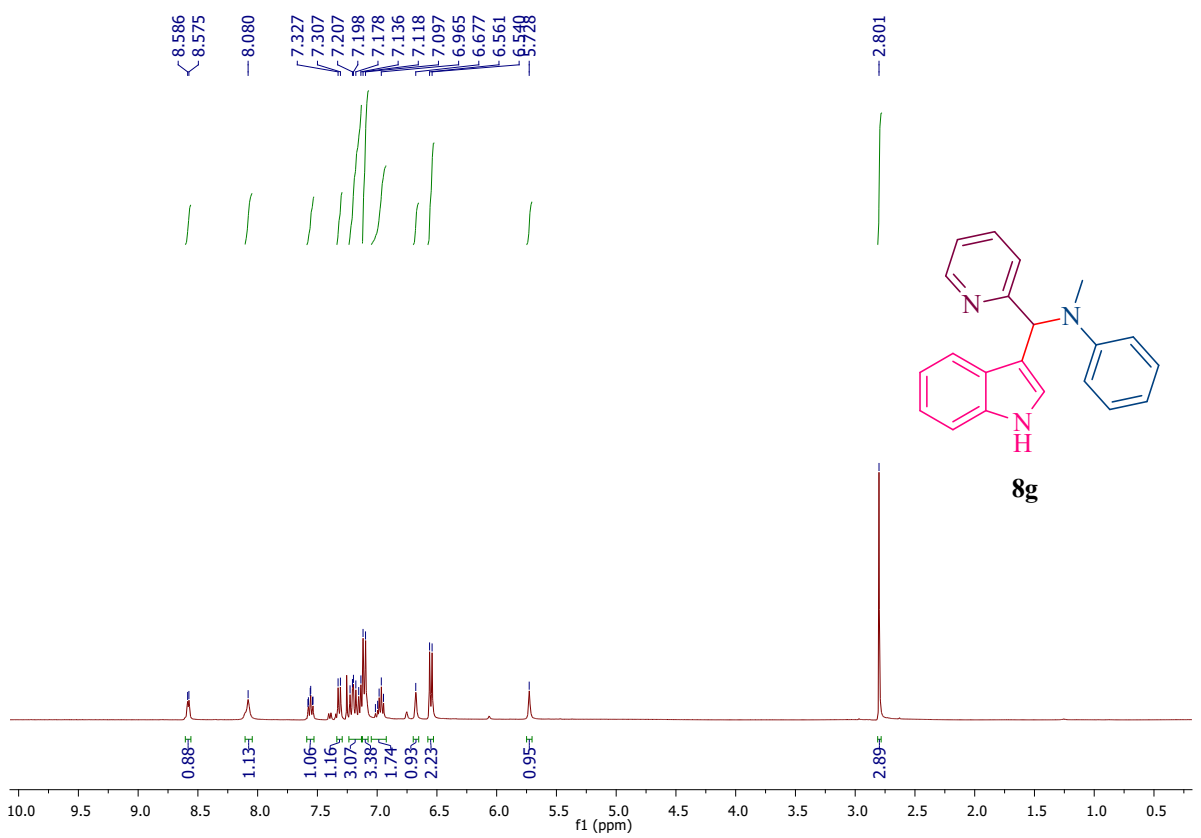

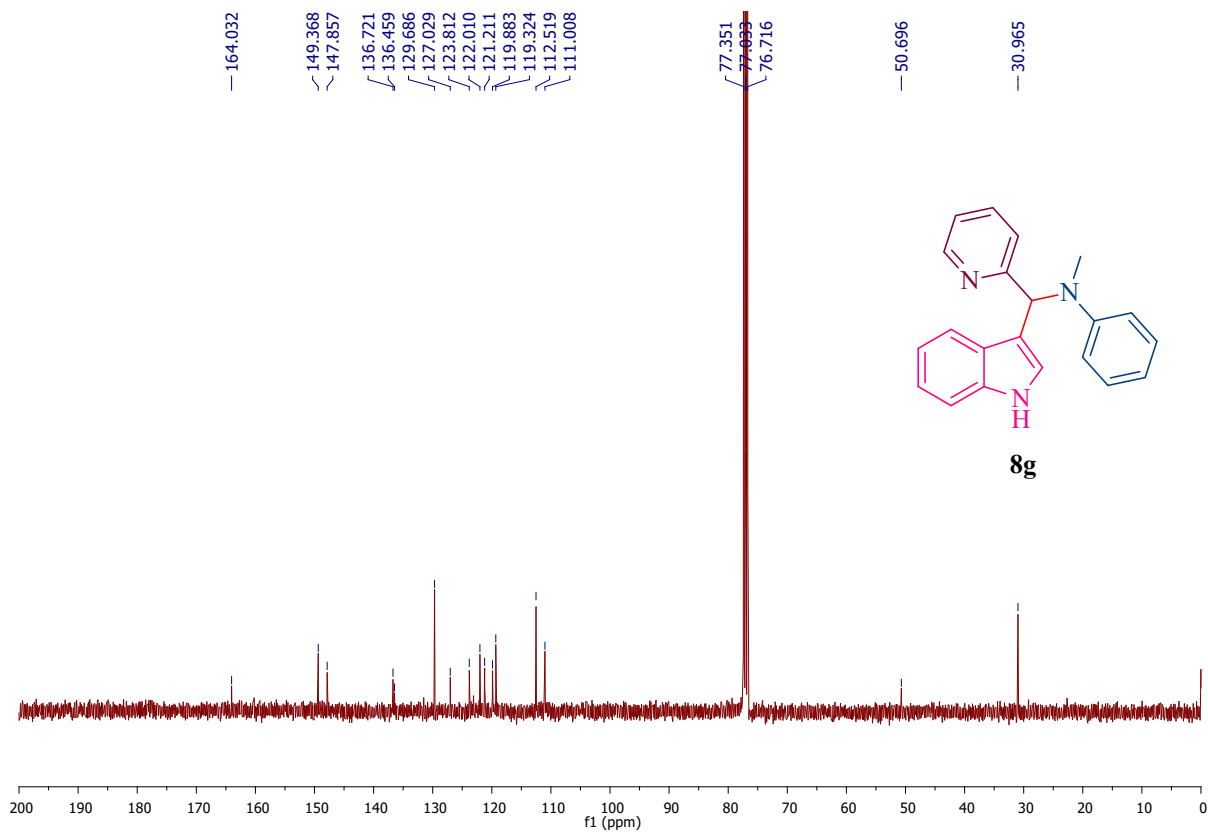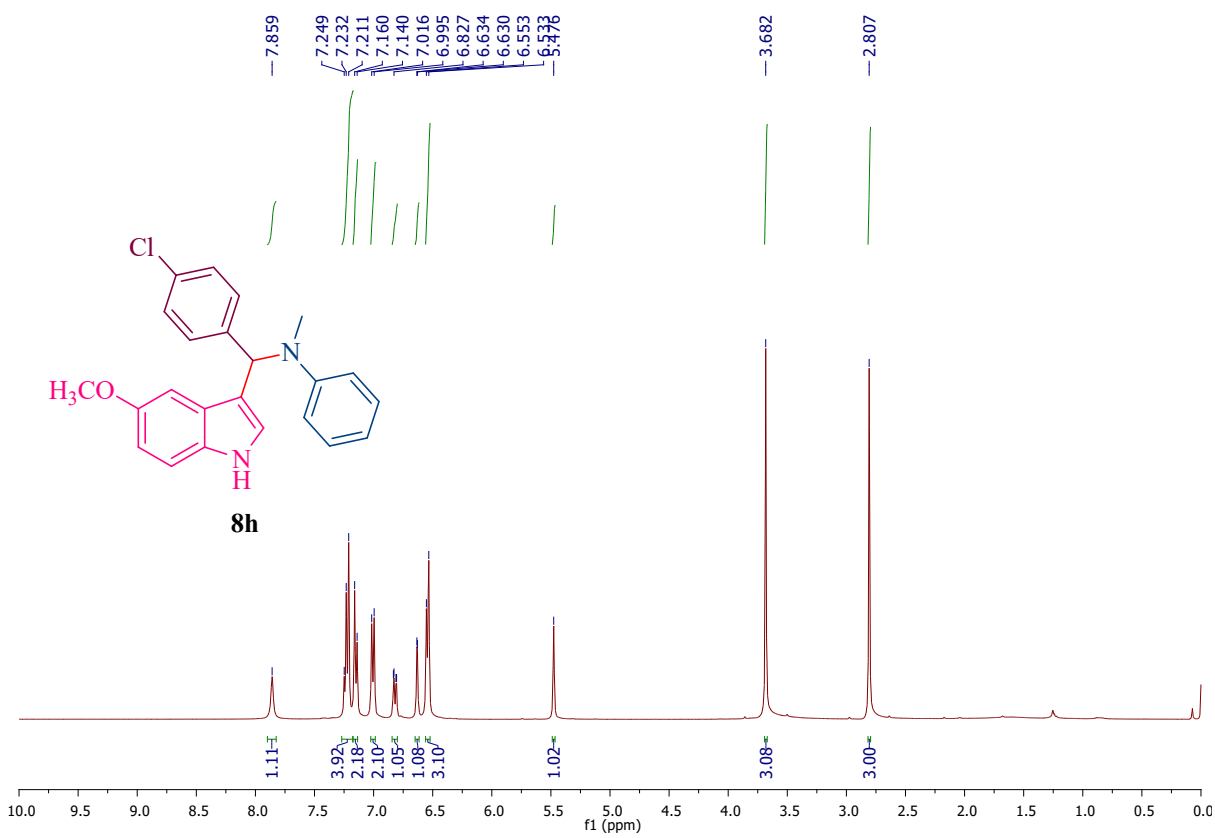

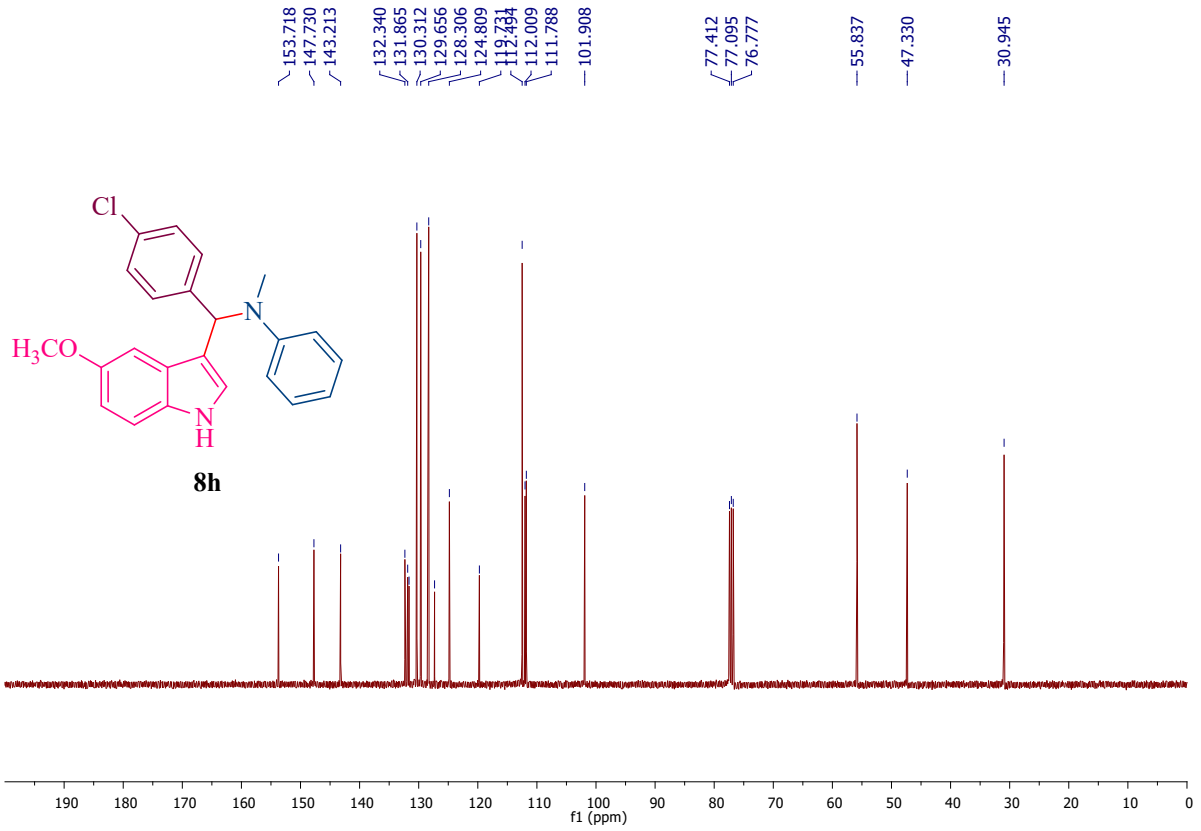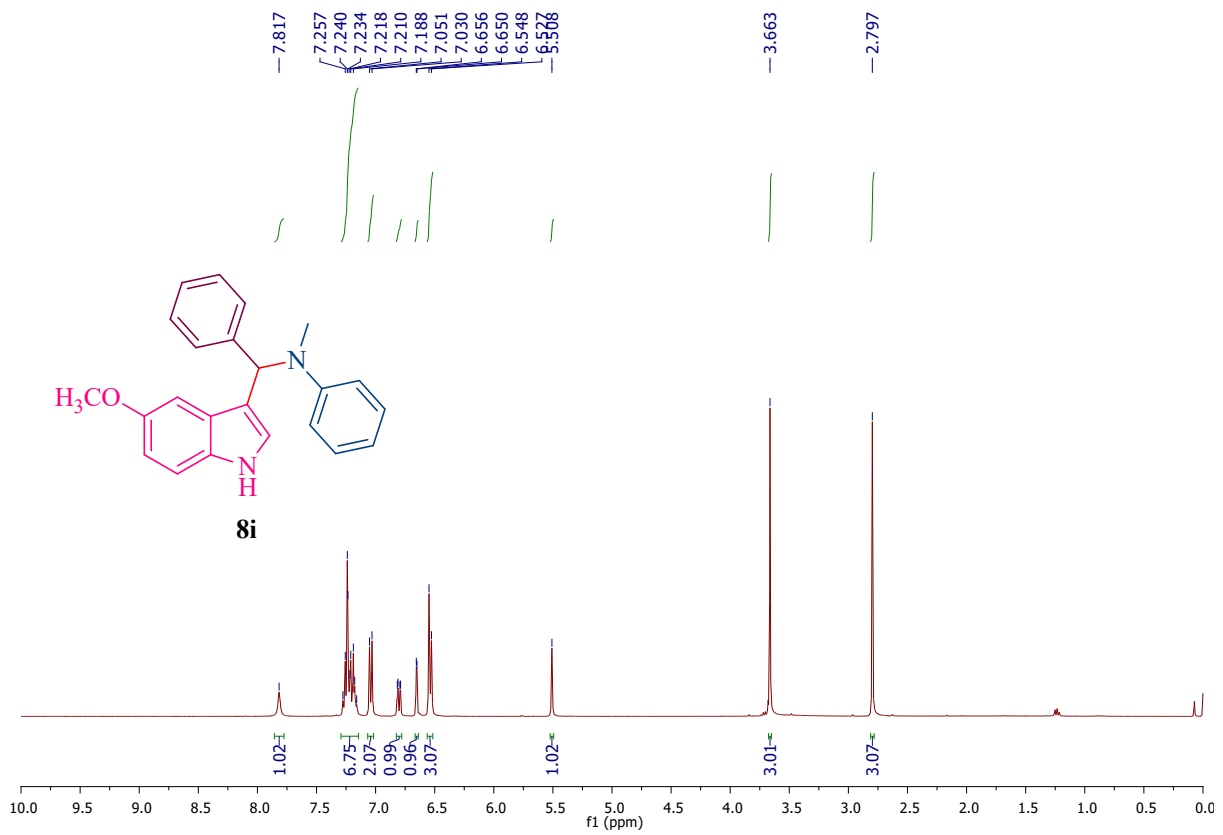

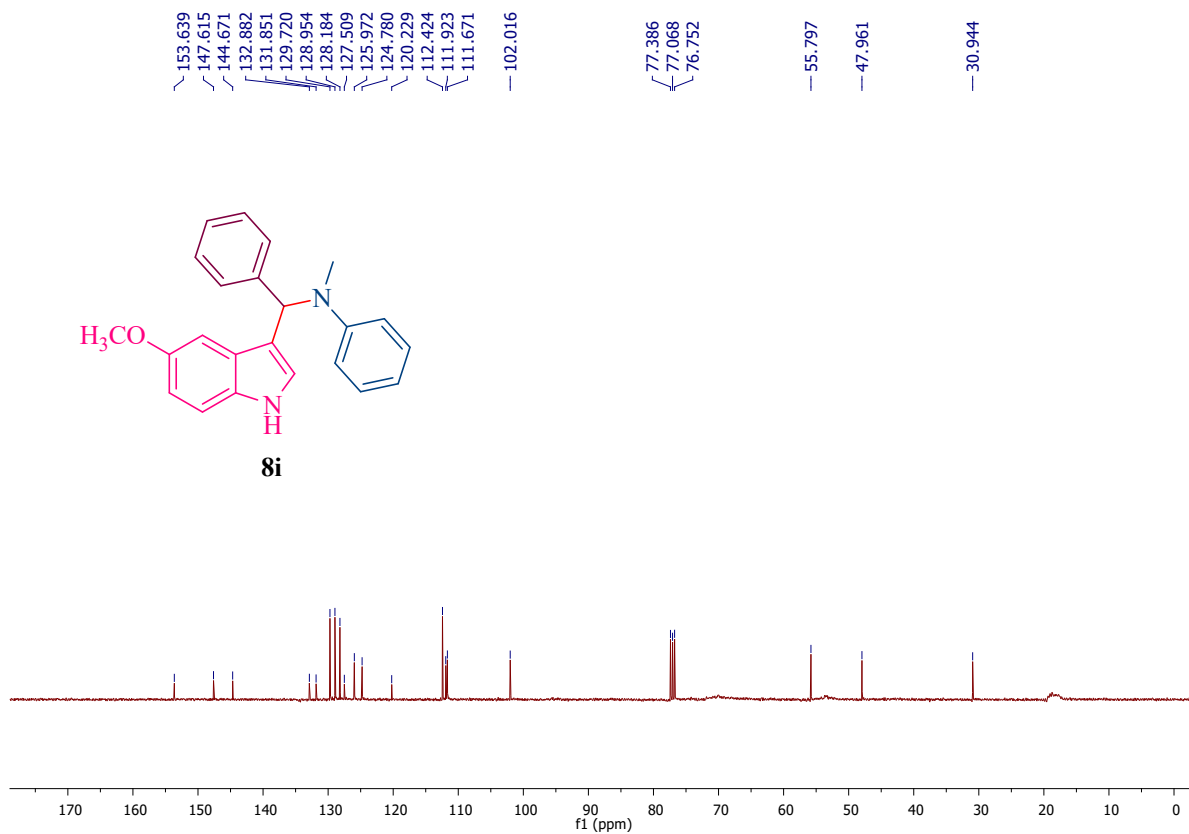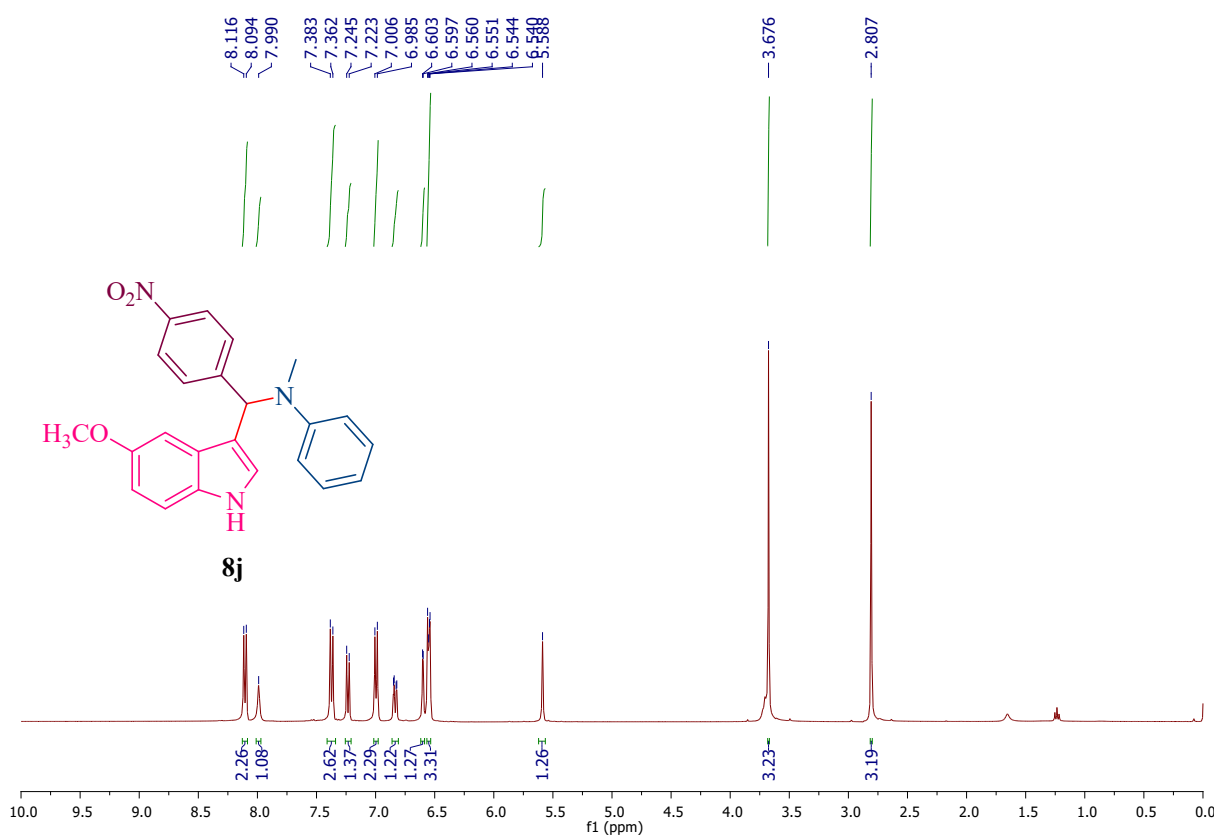

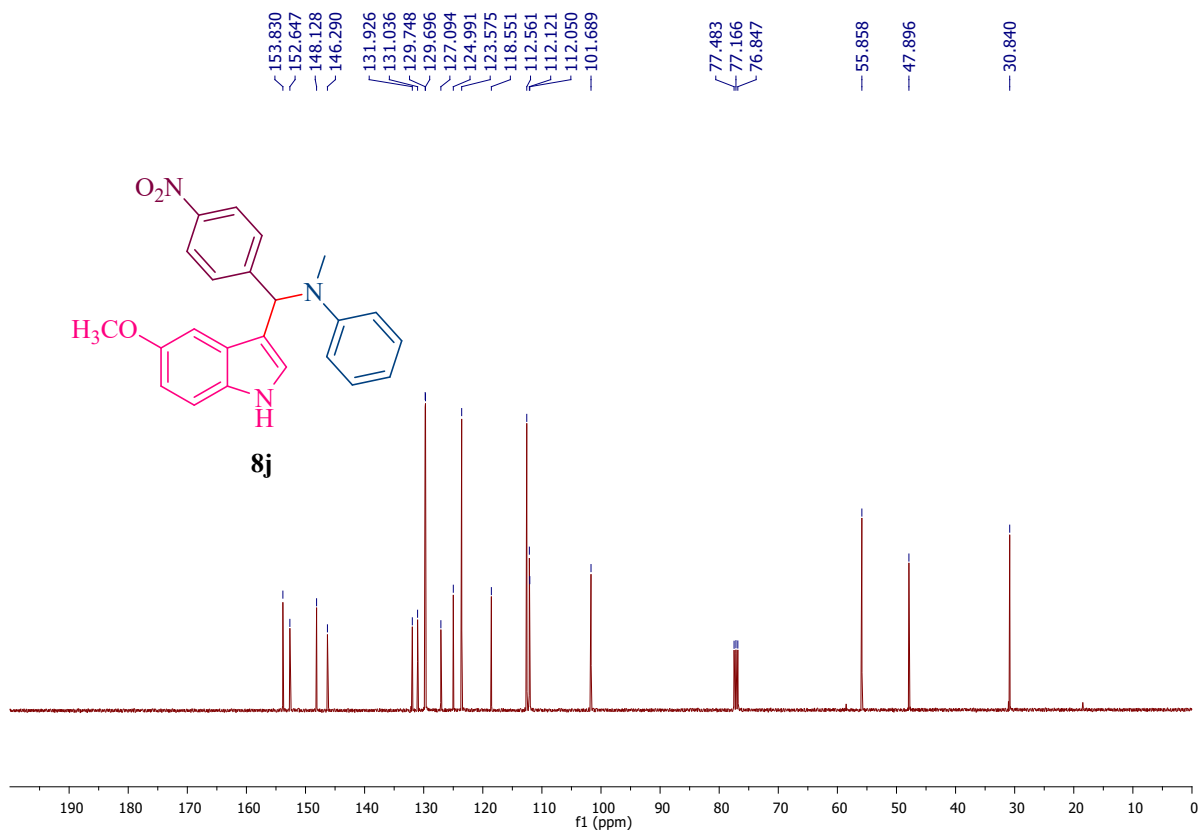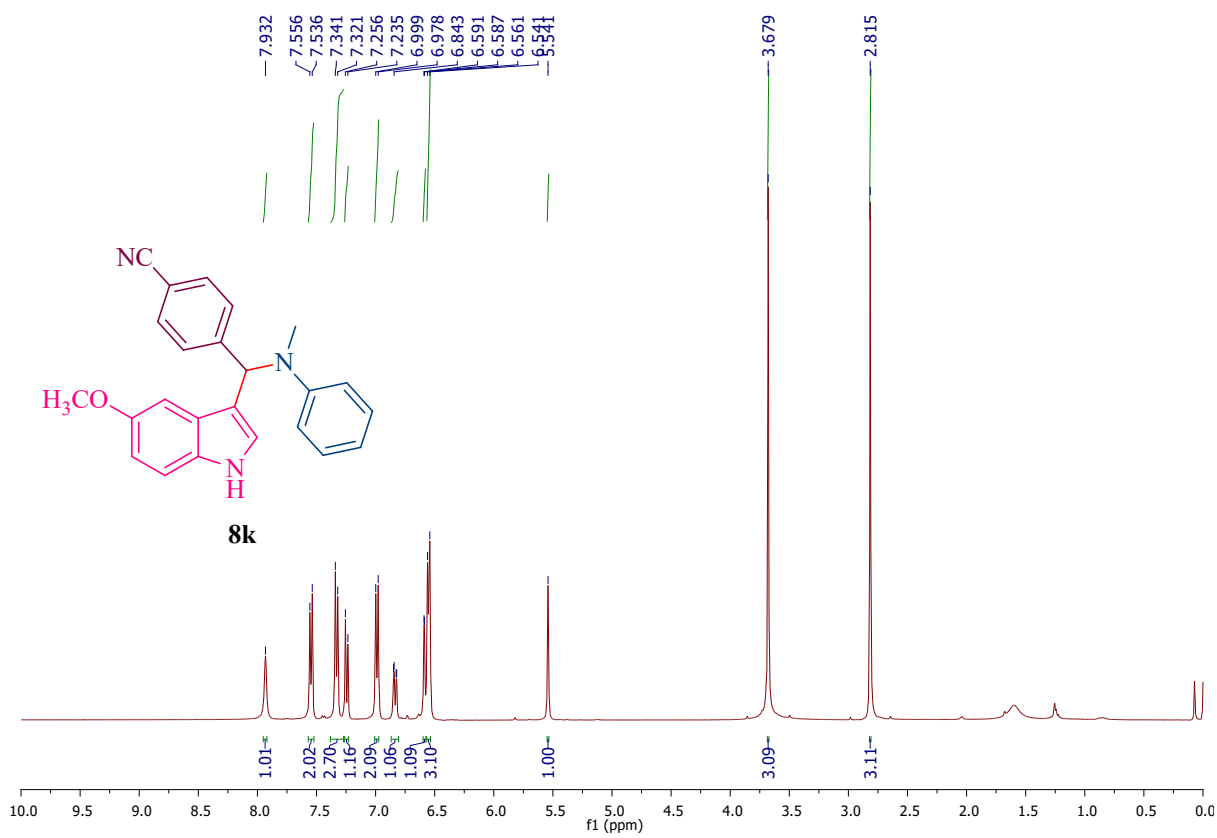

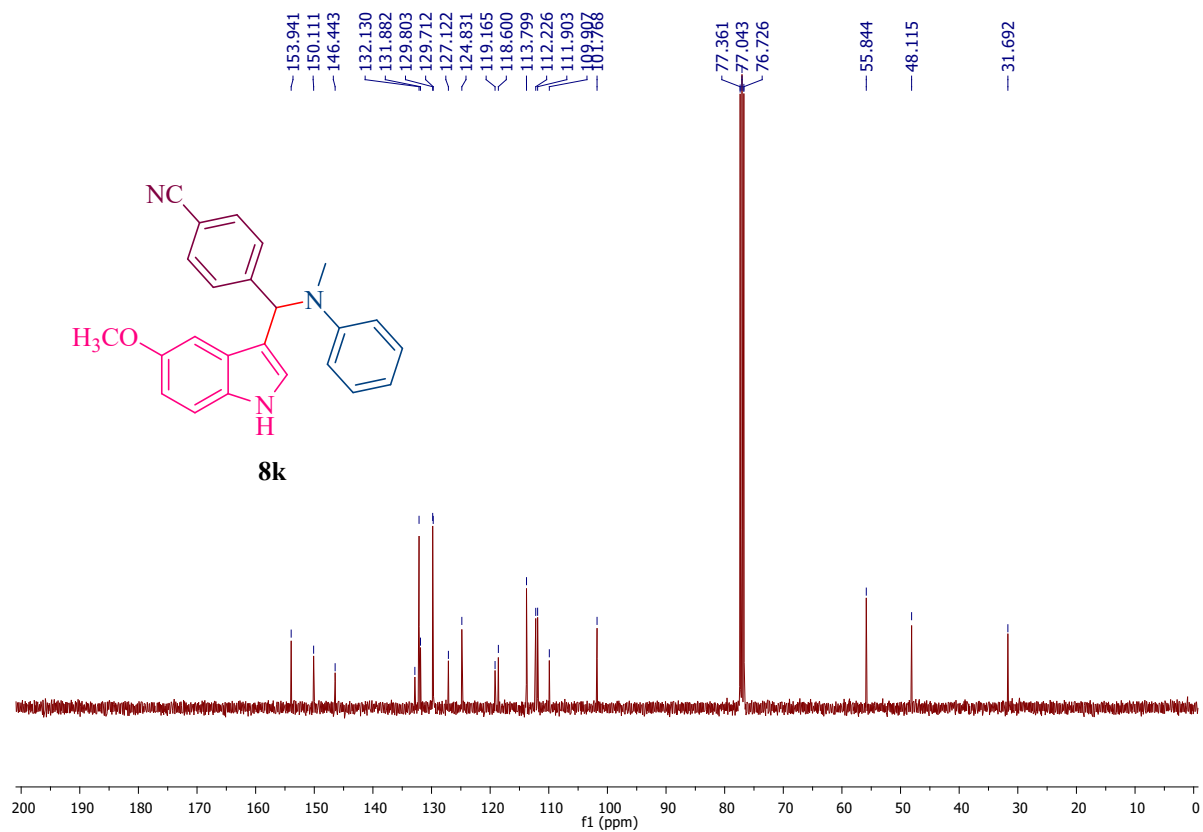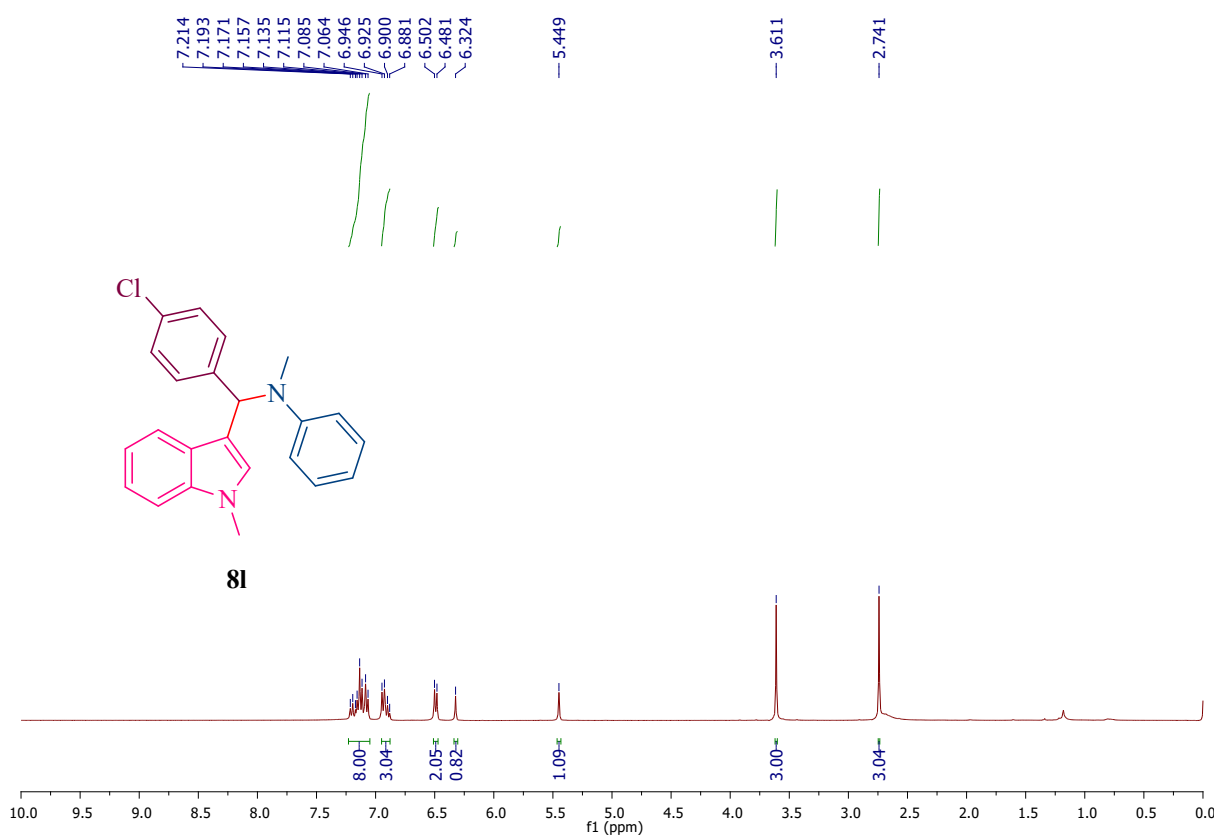

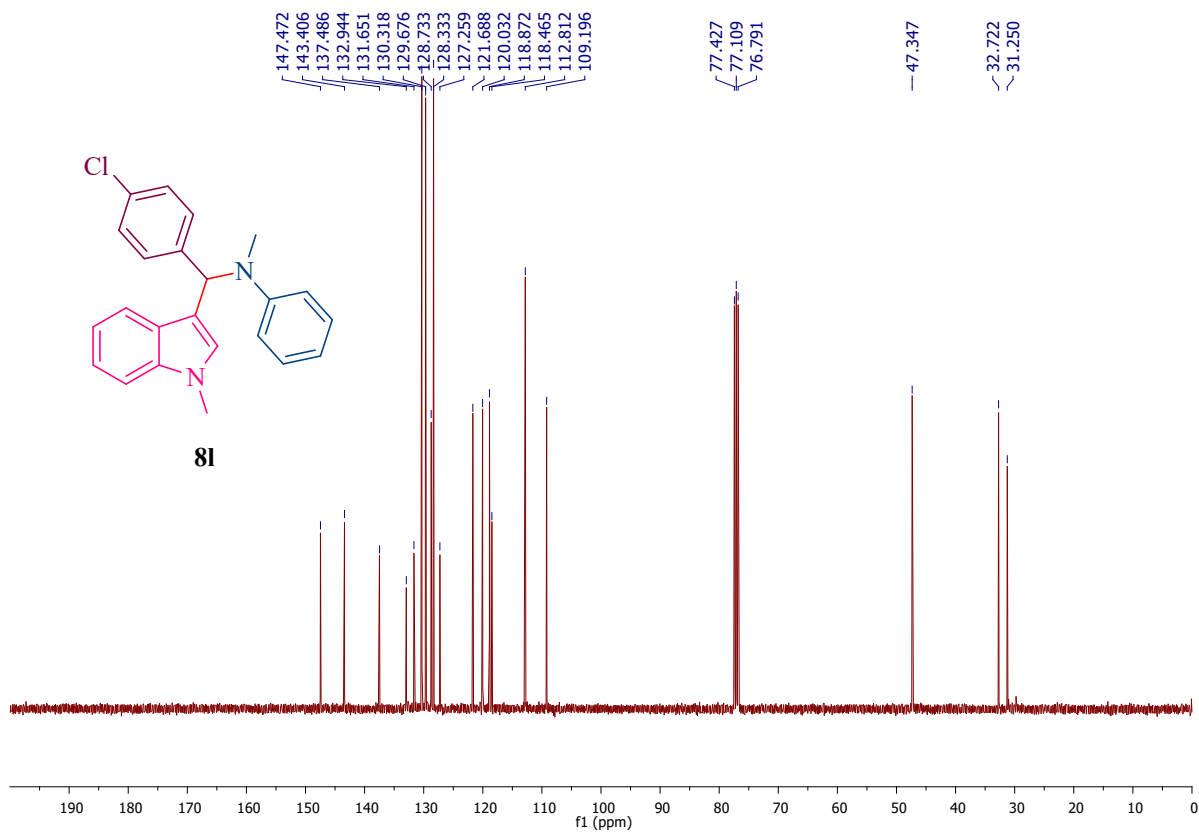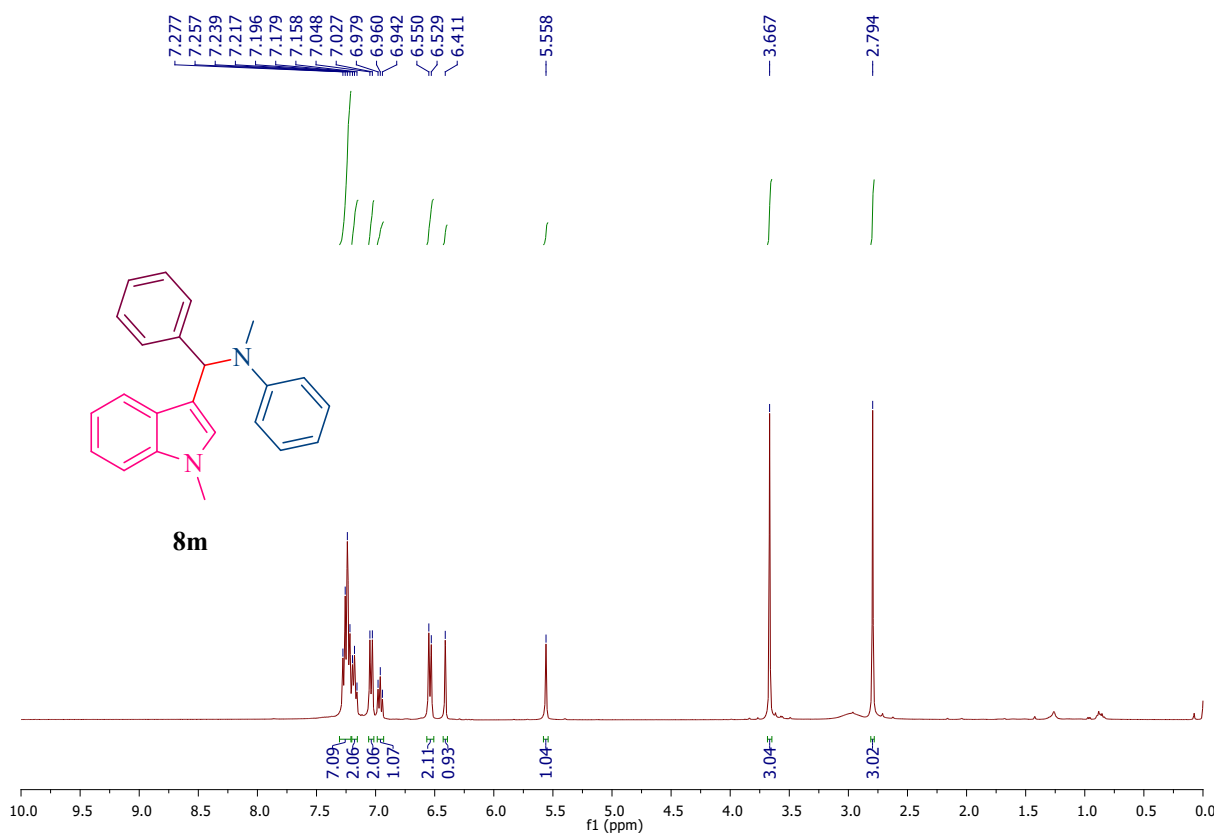



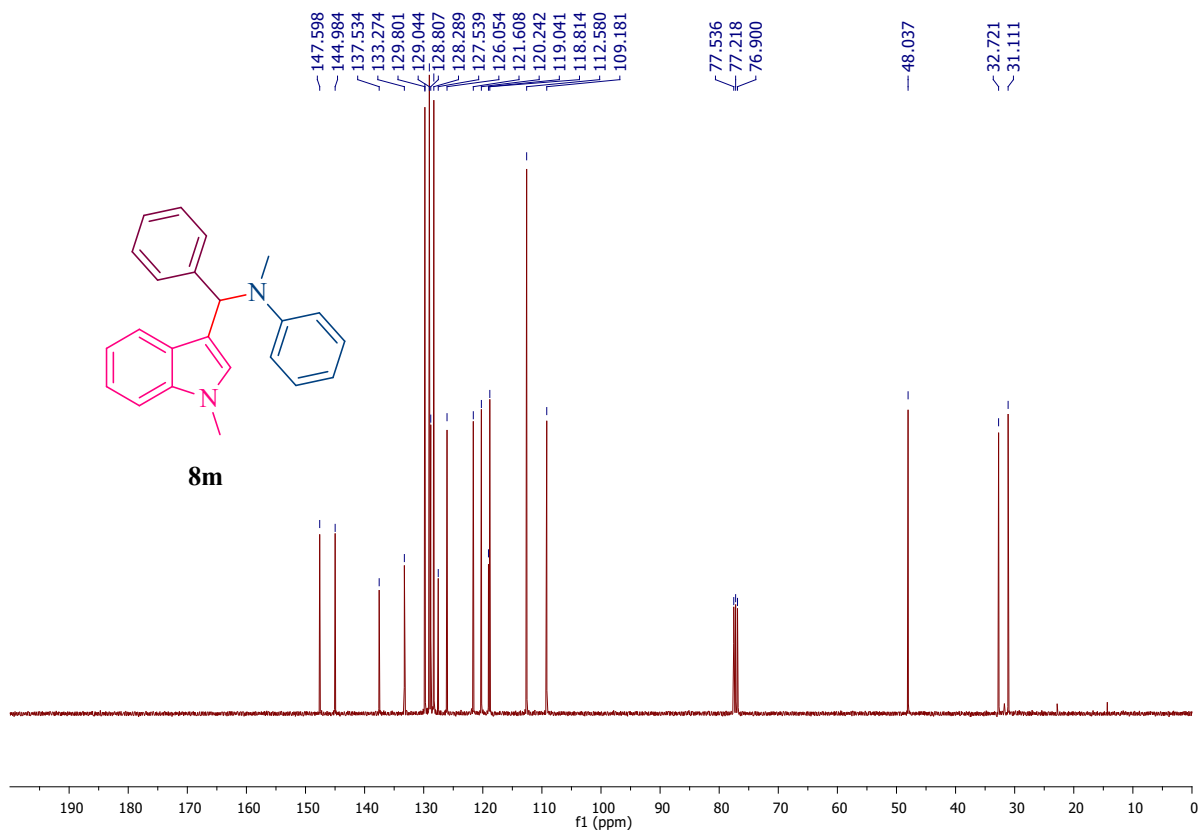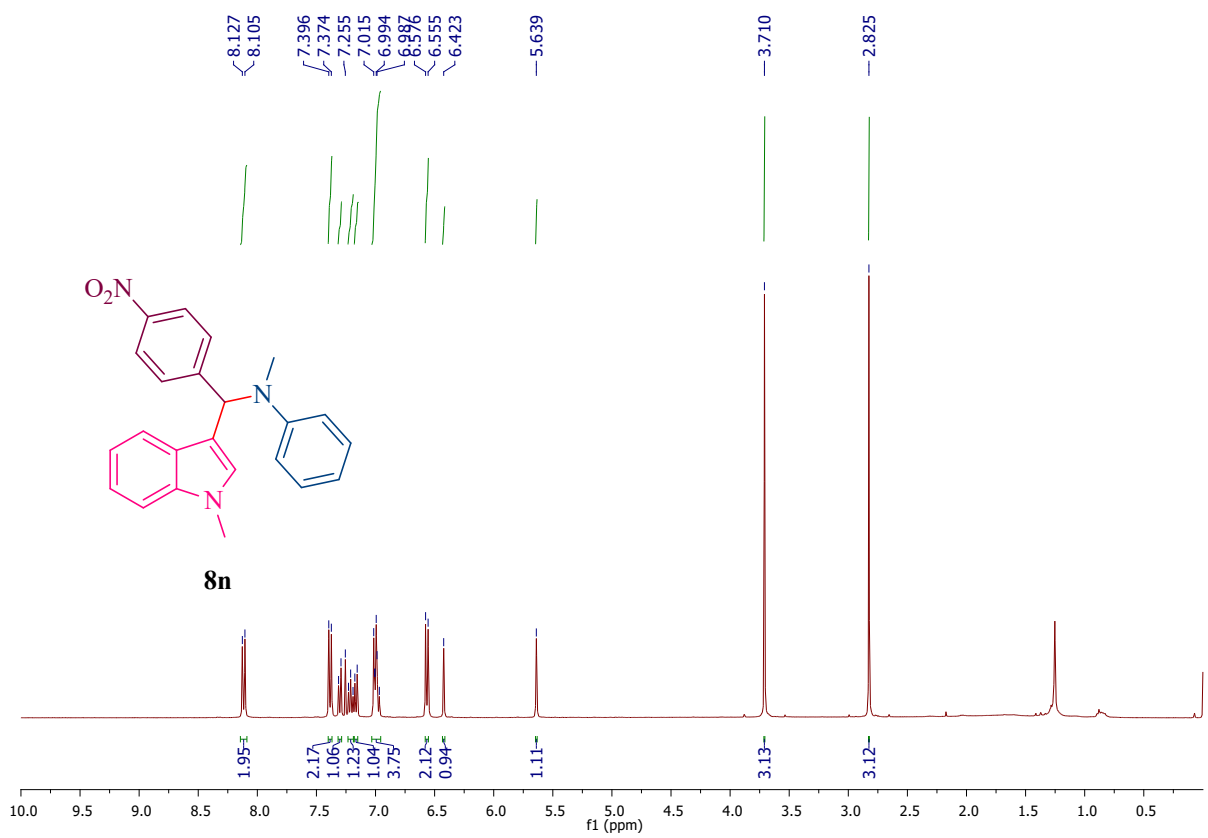

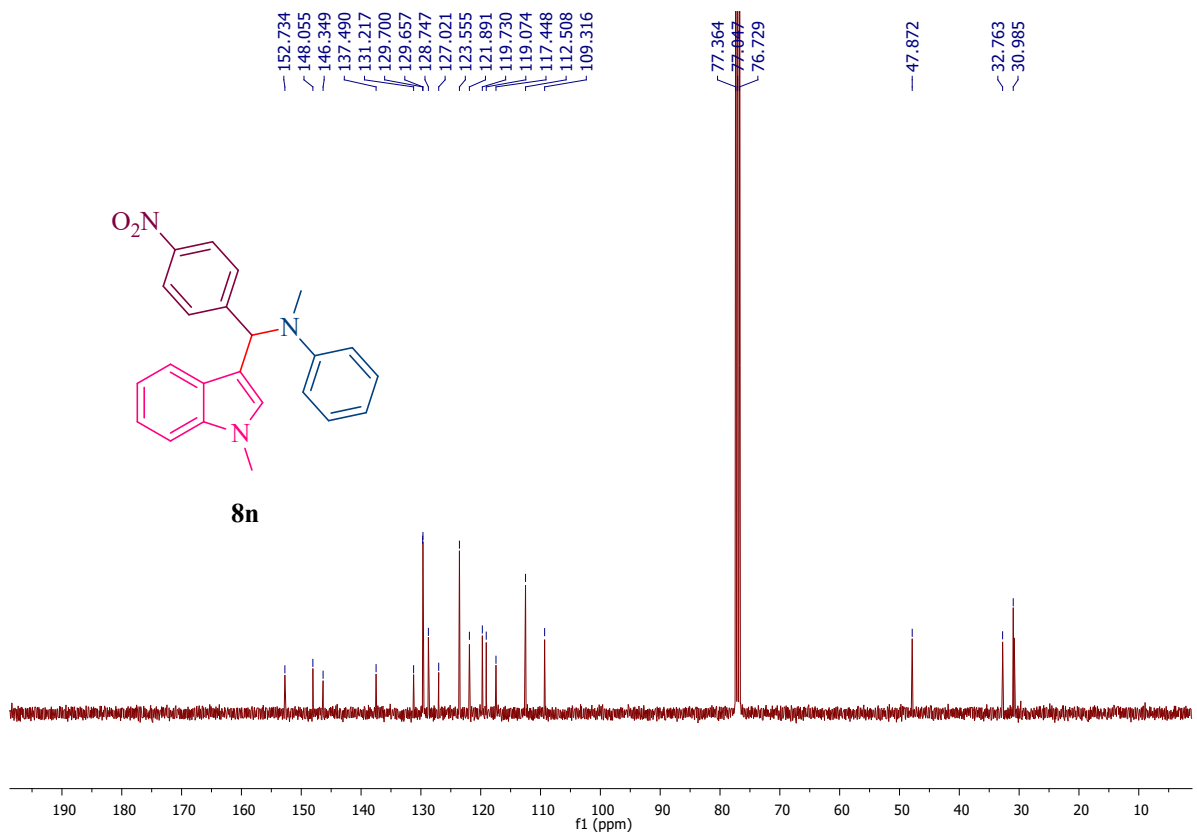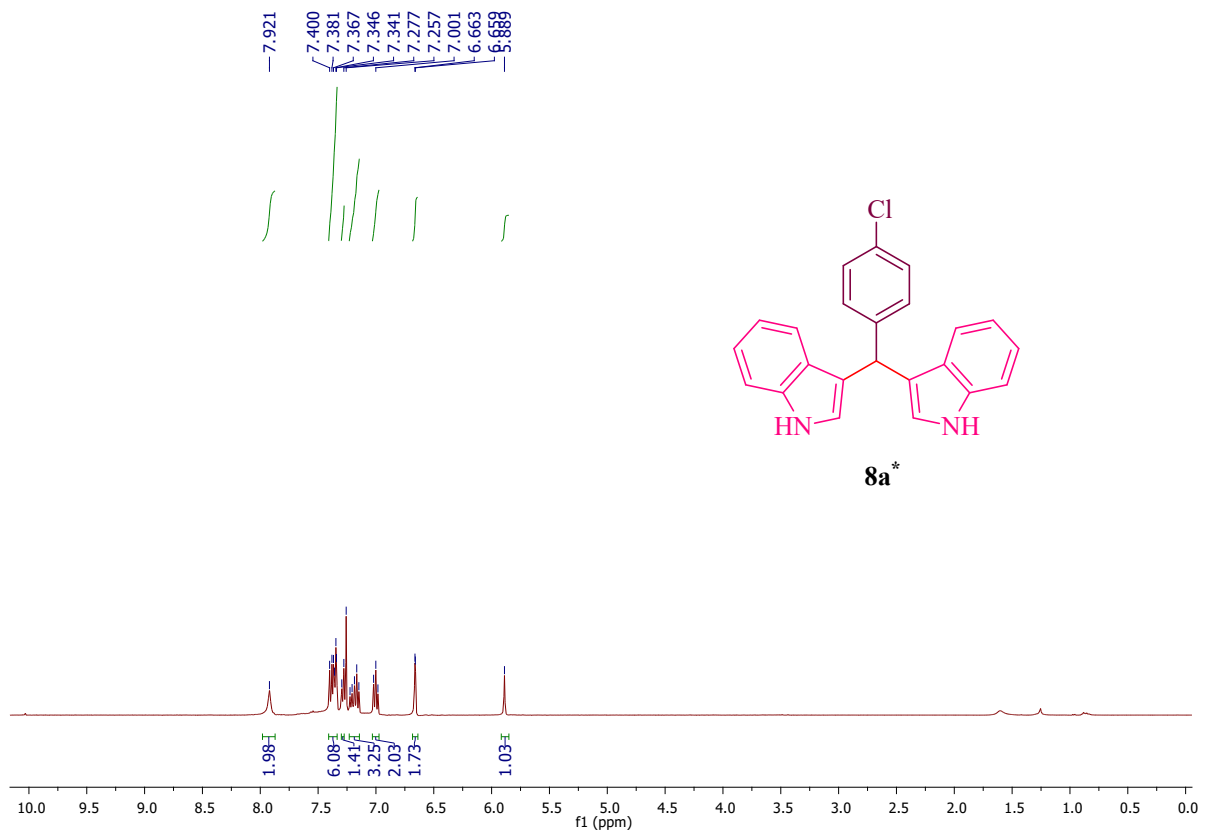

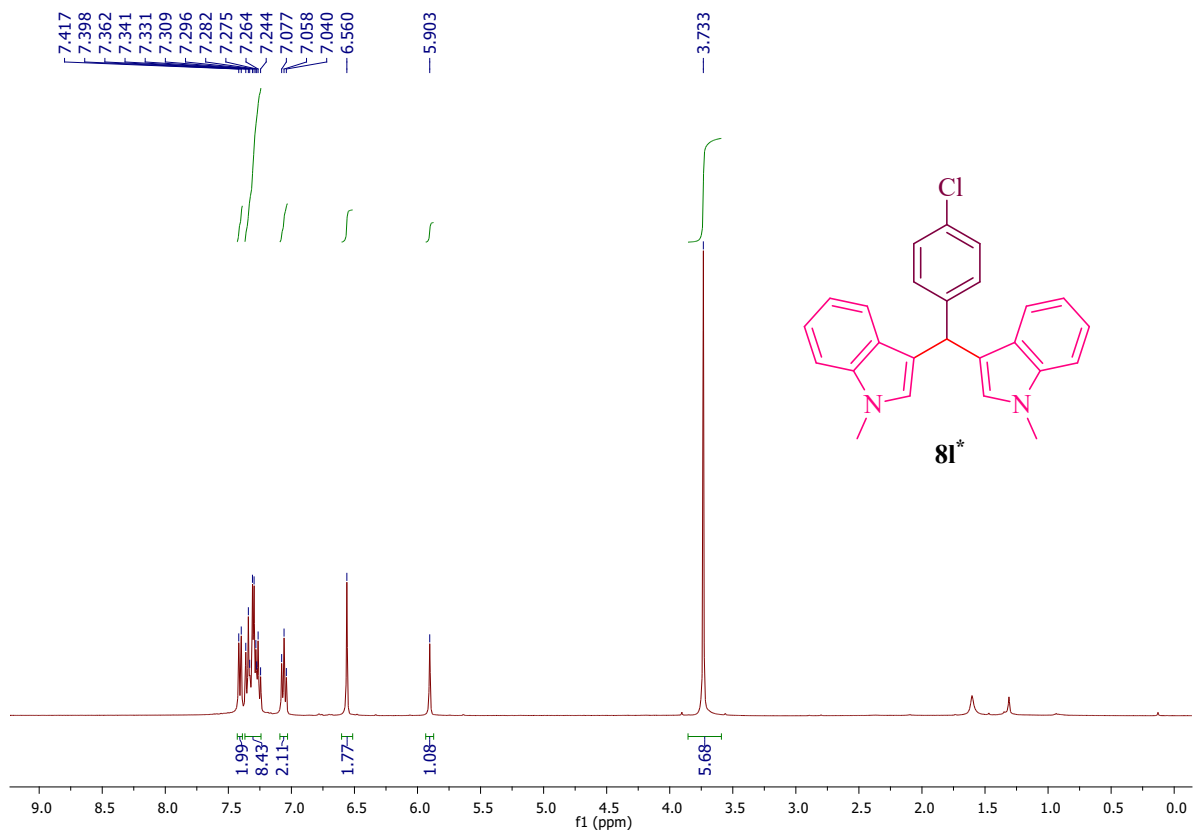

Supplement: d2nj00756h1.pdf [file d2nj00756h1.pdf]
